# Supplementary material for: Comparison of TNFα to Lipopolysaccharide as an Inflammagen to Characterize the Idiosyncratic Hepatotoxicity Potential of Drugs: Trovafloxacin as an Example
Source: Int J Mol Sci. 2010 Nov 18;11(11):4697–714. doi: 10.3390/ijms11114697 (PMC3000109; doi:10.3390/ijms11114697)
Supplement: Supplementary file 1 [file ijms-11-04697-s001.xls]

## Sheet: Sheet1
Comparison of TNFa to Lipopolysaccharide as an Inflammagen to Characterize the Idiosyncratic Hepatotoxicity Potential of Drugs: Trovafloxacin as an Example
Michael J. Liguori, Amy C. Ditewig, Jane F. Maddox, James P. Luyendyk, Lois D. Lehman-McKeeman, David M. Nelson, Vasanthi M. Bhaskaran, Jeffrey F. Waring, Patricia E. Ganey, Robert A. Roth, and Eric A.G. Blomme
All gene expression changes; changes with p>0.05 are considered unchanged (FC=1)
Sequence Code	Primary Sequence Name	Gene Name	Veh_Trovafloxacin1	Veh_Trovafloxacin_2	Veh_Trovafloxacin3	Veh_Levofloxacin1	Veh_Levofloxacin2	Veh_Levofloxacin3	TNFa_Veh1	TNFa_Veh2	TNFa_Veh3	TNFa_Trovafloxacin1	TNFa_Trovafloxacin2	TNFa_Trovafloxacin3	TNFa_Levofloxacin1	TNFa_Levofloxacin2	LPS+Veh1	LPS+Veh2	LPS+Veh3	LPS+Veh4	LPS+Veh5
1390860_at	Igf2bp3	insulin-like growth factor 2 mRNA binding protein 3	1	-3.02464	-3.9162	1	1	1	-5.89736	-8.17859	-3.72308	-5.02543	-11.2101	-9.58874	-4.78755	-4.4308	-2.26928	-2.26408	-3.42112	-4.43278	-5.98098
1387981_at	Olr59	olfactory receptor 59	-1.81313	-2.17909	-2.96845	1	1	-1.86345	-2.3246	-3.2555	-2.3865	-9.68306	-18.3949	-11.1532	-3.97349	-5.17639	1	-5.66552	-7.51269	1	-4.61709
1367758_at	Afp	alpha-fetoprotein	1	1	1	1	1	1	-2.2539	-6.6661	-4.45585	-4.98323	-4.23755	-6.61723	-4.40792	-6.03316	-3.09577	-5.30169	-8.10911	-5.76585	-3.483
1392852_at	Smoc1	SPARC related modular calcium binding 1	-1.99345	-1.49761	-2.01495	1	-1.59036	-1.4355	-4.44147	-2.87388	-2.97626	-5.95899	-6.61876	-6.14881	-6.30481	-4.94261	-5.11041	-3.40437	-2.62242	-2.59771	-3.59554
1379452_at	Gas2	growth arrest-specific 2	-1.35409	1	-1.47387	1	-1.38421	1	-4.09376	-2.77264	-2.63809	-5.34897	-10.524	-4.62547	-6.10786	-3.82085	-2.80911	-3.05582	-2.49813	-3.30305	-3.93749
1391056_at	RGD1562954_predicted		-1.75584	-2.31717	-2.49523	1	-1.46991	1	-3.45603	-2.57265	-4.11079	-5.54127	-6.15299	-5.57594	-6.17225	-3.15629	-1.97827	-4.77939	-4.19591	-1.87138	-6.78237
1382518_at	Pde8a	phosphodiesterase 8A	1	1	1	1	1	1	-4.42533	1	1	-8.97496	1	-6.26761	-4.59575	1	-5.46645	-3.24034	-4.55332	1	1
1376860_at	Slc22a23	Solute carrier family 22, member 23	1	-1.52107	1	1	1	1	-3.67438	-2.92998	-2.69481	-4.96232	-3.96538	-4.15278	-3.59958	-3.94811	-4.15733	-2.43356	-2.61855	-2.27743	-2.94523
1389785_at	Acy3	aspartoacylase (aminoacylase) 3	-1.82797	-1.73523	-2.52565	1	-1.6448	1	-2.83886	-4.15813	-2.68232	-7.48366	-19.3641	-7.35957	-3.33945	-2.58016	-2.84127	-2.49534	-2.82081	-3.0426	-3.27823
1393202_a_at	Igf2bp3	Insulin-like growth factor 2 mRNA binding protein 3	-2.08882	-3.07134	-4.06303	1	1	1	-4.85361	-3.40271	-3.54381	-8.49592	-7.22808	-14.2806	-4.49408	-3.53941	-2.71415	-3.63832	-3.41755	-5.89645	-5.80142
1370464_at	Abcb1a	ATP-binding cassette, sub-family B (MDR/TAP), member 1A	-2.28182	-2.87601	1	1	1	1	-5.94749	-3.30955	-3.23555	-17.7461	-4.24684	-16.5328	-7.86826	-13.6327	-2.95057	-2.702	-1.68271	-2.83036	-3.16686
1387307_at	Hal	histidine ammonia lyase	-2.39895	-1.76417	-1.69174	1	1	-2.06469	-5.98463	-2.92746	-5.86064	-11.9243	-11.5758	-9.35511	-5.9169	-5.12647	-3.23503	-2.90244	-2.76977	-2.49714	-3.14906
1387156_at	Hsd17b2	hydroxysteroid (17-beta) dehydrogenase 2	-2.36902	-3.7461	1	-3.54489	-4.65082	1	-4.32083	-4.84031	-2.7302	-7.89	-5.03339	-5.50326	-11.7819	-6.31262	-5.62811	-4.91879	-6.41994	-4.61908	-7.71081
1393070_at	Scrn2	secernin 2	1	1	1	1	1	1	1	1	1	-13.0743	1	-11.3057	-14.9091	-12.3413	1	1	1	1	1
1369902_at	Bmf	Bcl2 modifying factor	-8.36382	-6.16374	-4.50696	1	1	1	-4.73696	1	-3.59495	-10.5989	1	-8.86044	-12.4323	-9.74745	1	1	1	1	1
1393560_at	RGD1310153_predicted		-4.57491	-3.52417	-4.46828	-1.93126	1	-3.14049	-4.43158	-2.09364	-2.92642	-11.4111	-13.4692	-8.64305	-5.62821	-3.56806	-6.37531	-4.66929	-7.0419	-2.60262	-2.82259
1389908_at	Nfia		1	1	1	1	1	1	-6.13289	-4.32856	-2.41175	-18.375	-23.5455	-21.408	-5.3264	-10.0878	-3.9524	-4.39192	-4.18071	-6.20807	-5.47002
1369485_at	Acot12	acyl-CoA thioesterase 12	-1.68934	1	1	1	1	1	-3.29655	-4.08697	-3.53413	-18.6744	-4.12887	-22.3883	-9.16653	-3.60518	-4.35521	-4.32476	-3.51663	-4.23304	-4.3301
1387947_at	Mafb	v-maf musculoaponeurotic fibrosarcoma oncogene family, protein B (avian)	1	-1.647	-1.4288	1	1.79762	1	-4.63623	-2.97127	-4.82115	-7.97807	-3.5897	-6.15695	-2.81291	-3.69962	-4.49943	-3.29127	-5.70114	-2.58841	-5.22882
1387492_at	Slco2a1	solute carrier organic anion transporter family, member 2a1	-1.37672	-1.8752	1	1	1	-1.79264	-4.00103	-3.05178	-3.49187	-5.71836	-1.96328	-4.29519	-4.65153	-5.13398	-4.68594	-5.27952	-2.91532	-2.52634	-3.22666
1390822_at	Cdh16	cadherin 16	1	1	1	1	1	1	-8.27113	1	1	1	1	1	1	1	1	1	1	1	1
1387924_at	Ngef	neuronal guanine nucleotide exchange factor	1	1	1	1	1	1	-7.08944	-3.76106	-6.21657	-6.50412	1	-11.0543	-8.16885	-7.65612	1	1	1	-5.60879	-4.97118
1393508_at	1393508_at		1	1	1	1	1	1	-4.57464	-8.57401	-3.02106	-3.62429	-6.15974	1	-3.00562	-3.12196	-3.05576	-2.71662	-3.78443	-1.61129	-4.3265
1377048_at	Dak	dihydroxyacetone kinase 2 homolog (yeast)	-3.23604	1	1	1	1	1	-7.90665	-3.91807	-7.03489	-5.19613	-10.7366	-3.91726	-4.82868	-5.38518	-2.92359	-3.66919	-2.95365	-3.23788	-2.49662
1387228_at	Slc2a2	solute carrier family 2 (facilitated glucose transporter), member 2	-1.40424	-1.22511	-1.31922	1	1	1	-9.70721	-4.19473	-7.90077	-5.91362	-7.40223	-3.55155	-3.99468	-3.09287	-4.20699	-4.17231	-2.47418	-1.86428	-4.00176
1379636_at	Fam82a	family with sequence similarity 82, member A	1	-1.54001	-1.88463	-1.32491	1	1	-3.71024	-3.77806	-2.83592	-5.72894	-10.692	-6.74343	-3.65201	-2.82537	-2.01686	-3.96742	-2.01603	-3.68935	-3.12214
1371069_at	Slc22a23	solute carrier family 22, member 23	1	1	1	1	1	1	-3.91879	-4.15797	-3.06642	-3.4101	1	-4.06872	-6.76934	-5.06265	-5.31401	-3.40436	-2.98541	-2.63178	-4.17604
1368755_at	Clec4f	C-type lectin domain family 4, member f	1	1	1	1	1	1	-12.283	-7.89282	-5.90877	-3.88513	-16.4854	-3.29118	-4.9006	-2.88643	-4.58123	-5.72723	-2.46682	-1.9149	-2.49502
1371915_at	Pcbp4	poly(rC) binding protein 4	1	1	1	1	1	1	-6.81865	-3.7464	-8.08515	-9.41744	1	-17.8711	1	-9.03201	-6.04881	-4.17695	-6.65199	1	1
1372920_at	Prodh	similar to Proline oxidase, mitochondrial precursor (Proline dehydrogenase) /// similar to Proline oxidase, mitochondrial precursor (Proline dehydrogenase)	-2.50742	-2.12254	-5.79858	1	1	1	-7.05889	-3.17061	-4.11073	-4.35458	-16.6774	-9.28341	-3.35317	-3.76167	-4.01	-7.15115	-4.7254	-3.26706	-2.80861
1371412_a_at	Nrep	Neuronal regeneration related protein	1	-1.94223	1	1	-2.37606	-3.47486	-12.3969	-5.94003	-10.7517	-6.98018	-8.63474	-5.6246	-1.69204	-4.2666	-2.33455	-5.00045	-4.67996	-2.90327	-8.26934
1369864_a_at	Sds	serine dehydratase	-2.29939	1	-2.28655	1	2.93687	1	-34.2652	-25.3841	-29.6008	-28.9042	-57.4581	-27.7021	-4.31182	-9.67524	-17.7608	-4.57663	-5.29398	1	-6.01201
1368428_at	Xpnpep2	X-prolyl aminopeptidase (aminopeptidase P) 2, membrane-bound	-1.82377	-3.04094	-4.11899	-2.44079	1	-1.74105	-7.72671	-5.08461	-8.71437	-5.19522	-7.83801	-12.6267	-5.40607	-9.35208	-3.54006	-6.19844	-5.40281	-1.81613	-16.4883
1383814_at	1383814_at		1	1	-8.02383	-7.88775	-8.35596	-7.59184	1	1	1	-7.16607	1	-6.60127	1	1	1	1	1	1	1
1376505_at	1376505_at		-5.98636	-6.50392	1	1	1	1	1	1	1	-6.49813	1	1	-5.71839	-5.33386	1	1	1	1	1
1380038_at	RGD1560364	similar to vacuolar protein sorting 13C protein	1	-3.55891	-5.21931	-4.73976	1	-3.49493	1	1	1	-4.02097	1	1	1	1	1	1	1	1	1
1373244_at	Tmub2	transmembrane and ubiquitin-like domain containing 2	1	1	1	1	1	1	1	1	1	1	-27.4245	1	1	1	1	1	1	1	-2.4356
1388426_at	Srebf1	sterol regulatory element binding transcription factor 1	-4.98321	-4.07567	-6.47847	-3.18089	1	-2.76517	-4.84154	-4.93314	-5.10049	-7.47178	-8.18353	-9.13541	-5.87542	-7.45538	1	1	1	1	1
1377437_at	Veph1	similar to VEPH isoform A /// ventricular zone expressed PH domain homolog 1 (zebrafish)	1	1	-4.55396	1	1	1	-9.03548	1	-10.2451	-11.4124	1	-10.0728	-7.80959	-10.9194	1	1	1	1	1
1385077_at	Gbf1	golgi-specific brefeldin A-resistance factor 1	1	-8.90203	1	1	1	1	1	1	1	-11.2124	1	1	1	-9.29062	1	1	1	1	1
1389581_at	Il33	interleukin 33	1	-2.58064	-3.17734	-3.59036	-1.6946	-2.8449	-4.51617	-3.45488	-6.03515	-4.50314	-5.03156	-9.79308	-11.9909	-4.5109	1	1	1	1	1
1383102_at	1383102_at		1	1	1	1	1	1	1	1	1	-10.9189	-9.45193	1	1	1	1	1	1	1	1
1387006_at	Sult2al1	rat senescence marker protein 2A gene, exons 1 and 2	2.15664	-2.98702	-3.38835	-1.74029	-2.69408	1	-6.5693	1	-5.90612	-7.21321	-3.16764	-5.50463	-7.58077	-5.34706	-1.44232	-1.73721	1	-1.83689	-2.06074
1389112_at	Nkd1	naked cuticle 1 homolog (Drosophila)	1	1	1	1	1	-10.012	1	1	1	1	1	1	1	1	1	1	1	1	1
1388944_at	Sox11		1	1	1	1	1	1	1	1	1	1	1	-5.40392	1	1	1	1	1	1	1
1379888_at	LOC498633		1	-4.0235	-5.72478	1	1	1	-3.80821	1	-43.6871	-6.63206	1	1	-3.98568	1	1	1	1	-5.55248	-27.777
1367592_at	Tnnt2	troponin T2, cardiac	1	1	1	1	1	1	1	1	1	1	1	1	1	1	1	1	1	1	-4.72145
1394993_at	1394993_at		1	1	1	1	1	-3.2227	-7.38907	-5.1227	-5.68038	-3.59401	1	1	1	1	1	-3.43996	1	-5.04345	-4.36103
1379387_at	Rgs18		1	1	1	-5.05611	1	1	-8.18588	1	-3.56295	-6.29849	1	-8.42503	-3.4419	1	1	1	1	1	1
1383447_at	Etv5	ets variant gene 5	1	1	1	1	1	1	-3.77414	1	1	-4.43103	1	1	1	1	1	1	1	1	1
1386843_at	Cd5l	CD5 antigen-like	1	1	1	-3.94105	1	1	1	-4.3057	-4.08241	-4.6642	1	-5.74135	-5.22102	1	1	1	1	1	1
1396506_at	1396506_at		1	1	1	1	1	1	-4.49745	1	1	1	1	1	1	1	1	1	1	1	1
1367857_at	Fads1	fatty acid desaturase 1	-2.00425	-1.73767	1	1	1	1	-3.27029	-2.95478	-3.48005	-2.50256	-4.30262	-2.55125	-3.8718	-2.4525	-2.84804	-2.47253	-2.85807	-1.677	-3.22613
1390532_at	LOC500080		1	-3.0895	-2.90983	1	1	1	-4.34618	-3.40997	-4.7182	-5.95193	-4.07282	-7.19855	-5.2183	-3.87699	1	-3.90664	-3.3766	1	-3.42596
1385375_at	Noxa1_predicted		1	1	1	1	1	-2.95355	-5.81835	-5.01277	-3.22975	-9.9735	1	-4.82907	-3.40716	-3.75141	1	1	-3.74856	1	1
1385015_at	Zadh2	zinc binding alcohol dehydrogenase, domain containing 2	1	1	1	1	1	1	1	1	-4.93017	-9.47042	1	-7.70433	1	1	-4.14139	1	-5.69663	1	1
1391032_at	Sez6	seizure related gene 6	1	-2.98083	-5.79931	1	1	-2.07207	-3.20036	-2.56059	-2.86565	-3.54477	-4.17235	-3.34581	-3.80679	-2.69397	-1.80888	-5.73988	-5.15763	-1.86711	-3.5443
1376977_at	Ptger3	Prostaglandin E receptor 3 (subtype EP3)	-1.62137	-1.46592	-1.61036	-1.62876	-1.62973	-1.44724	-3.01625	-3.74027	-2.51794	-6.90185	-4.40348	-6.69394	-4.34558	-4.42797	-1.90887	-2.82274	-2.4923	-1.73035	-3.78681
1369169_at	Slc23a1	solute carrier family 23 (nucleobase transporters), member 1	1	1	-2.05292	1	1	1	-2.57838	-2.98988	-2.63465	-5.16771	-6.02993	-4.30042	-4.13896	-3.12535	-2.27605	-2.58118	-2.50346	-1.5979	-3.90986
1376068_at	Prr12	Proline rich 12	1	1	1	1	1	1	-4.05472	-3.76636	1	-5.56593	-5.23363	1	-4.38106	1	1	-4.06655	1	1	1
1388545_at	Smoc1	SPARC related modular calcium binding 1	-1.79976	-1.58705	-1.94645	-1.35801	-1.51852	-1.43849	-5.26212	-2.86579	-2.67898	-5.61297	-5.87878	-4.56507	-5.23417	-3.86203	-2.65469	-2.79699	-1.98368	-2.09579	-2.88028
1383795_at	1383795_at		1	1	1	1	1	1	-3.44808	-2.74745	-2.38736	-4.4551	-6.41013	-5.00151	1	-3.81226	-2.24084	-2.21118	-2.36529	-2.17857	1
1392612_at	Prlr		1	1	1	1	1	1	1	1	1	1	1	1	1	-6.60016	1	1	1	1	1
1388463_at	Tex264	testis expressed gene 264	1	1	1	1	1	-2.27899	-5.37516	-3.36794	-2.90796	-3.64278	1	-4.65635	-4.85851	-3.59225	-3.01988	-2.43934	-1.83106	-2.26976	-3.2112
1385635_at	Cd5l	CD5 antigen-like	1	1	1	-2.04344	1	1	-10.3162	-6.74145	-5.43799	-3.265	-9.0736	-4.0299	-7.36416	-2.69913	-2.47155	-3.15711	-1.83415	-1.95459	-2.79605
1368426_at	Crot	carnitine O-octanoyltransferase	-1.44914	-1.54173	1	1	1	1	-3.42847	-3.29462	-3.20847	-3.57256	-3.24433	-3.43614	-3.87809	-3.14374	-1.49511	1	-1.85408	-3.42311	-2.5865
1387183_at	Crot	carnitine O-octanoyltransferase	-1.504	1	1	-1.32731	1	1	-3.66994	-3.66387	-3.52291	-3.41817	-3.41529	-3.17311	-3.89173	-2.95186	-1.84911	1	-1.89993	-3.22584	-2.14163
1368435_at	Cyp8b1	cytochrome P450, family 8, subfamily b, polypeptide 1	1	1	1	1	1	1	-7.06499	-3.18076	1	-3.11233	-3.91861	-2.19644	-4.76383	-4.34634	-2.91845	-1.7658	-2.41487	-2.09571	-3.0658
1382335_at	Gsta3		1	1	1	1	1	1	1	1	1	1	1	1	-10.1182	1	1	1	1	1	-6.11244
1383722_at	Prosc	proline synthetase co-transcribed	1	1	1	1	1	1	-3.47862	1	-2.76143	-14.3674	-10.8137	-14.3761	1	1	1	-2.83964	-2.89321	1	1
1368558_s_at	Aif1	allograft inflammatory factor 1	1	1	1	-2.32393	1	1	-4.78871	-2.17326	-3.81595	-2.90352	-3.94663	-3.59058	-3.87931	-2.83753	-2.96587	-2.66877	-1.86789	1	-2.63617
1367838_at	Cth	cystathionase (cystathionine gamma-lyase)	-1.42252	-1.39577	-1.70703	1	1	1	-6.16315	-2.96896	-5.67215	-4.34391	-4.67708	-4.9064	-4.08162	-2.6194	-2.83204	-2.57373	-1.60746	-2.00702	-2.41316
1375781_at	1375781_at		-2.40311	-2.32924	-4.1611	-1.82397	1.49551	-1.89501	-8.9684	-2.39241	-4.07788	-3.65767	-3.04347	-2.78338	-4.00435	-1.98755	-1.95011	-2.13642	-1.91513	1	1
1373970_at	Il33	interleukin 33	1	-2.2295	-2.47815	-2.05654	1	-1.82811	-2.62243	-1.94455	-3.16766	-2.63064	-4.50316	-3.93681	-4.15019	-3.15281	1	1	1	1	1
1379363_at	Mgam_predicted		1	1	-3.89611	-2.53674	1	1	-3.81902	-2.15423	-4.30492	-3.50283	-6.016	-3.29093	-3.94913	-2.77631	1	1	1	1	1
1371104_at	Srebf1	sterol regulatory element binding transcription factor 1	-2.57283	-2.99933	-4.36224	-2.06267	1	1	-3.04536	-2.84179	-3.18652	-4.24908	-9.39603	-4.442	-3.14552	-3.57042	1	1	1	1	1
1382856_at	Xrcc6bp1	XRCC6 binding protein 1	1	1	1	1	1	1	1	1	1	-7.57018	1	-8.6836	1	1	-2.28487	1	1	1	1
1390944_at	Chmp4c	chromatin modifying protein 4C	1	1	1	1	1	1	1	1	1	1	1	1	1	-8.36184	-4.2941	1	1	1	1
1389855_at	Ppp2r2c	Protein phosphatase 2 (formerly 2A), regulatory subunit B (PR 52), gamma isoform	1	1	1	1	1	1	-10.8784	1	1	1	-8.62519	1	1	1	1	1	1	1	1
1387704_at	Esr1	estrogen receptor 1 (alpha)	1	1	1	1	1	1	-8.09336	1	1	1	1	1	1	1	1	1	1	1	1
1376944_at	Prlr		1	1	1	1	1	1	-8.1251	1	-4.04451	-3.40035	1	-6.76917	-2.86656	-2.8231	1	1	1	1	1
1370384_a_at	Prlr	prolactin receptor	1	1	1	-4.71834	-2.09905	-2.33848	-5.80394	-3.02603	-12.6931	-8.83713	-5.22102	-7.43566	-6.8593	-9.19099	1	-2.34821	1	-3.62172	-3.51384
1389782_at	RGD1305587	hypothetical protein LOC679430 /// similar to RIKEN cDNA 2010107G23	-2.04364	-2.35894	-2.10353	1	1	1	-1.78949	1	1	-7.46276	-8.45744	-8.66788	-4.52002	-2.69633	-4.10227	-4.6662	-3.52812	-2.06734	-4.05614
1377412_at	1377412_at		-1.76713	-1.76979	-1.95328	-2.17924	1	-1.77137	-3.43706	1	-2.11361	-8.47469	1	-12.445	-3.74531	-3.02963	-6.79607	-2.59968	1	-2.78819	-2.73952
1368264_at	Pex6	peroxisomal biogenesis factor 6	1	-2.08035	1	1	1	1	1	1	1	-7.51075	-14.8819	-7.2967	-3.16546	-3.26477	-4.30501	1	-3.72428	-2.58254	1
1372987_at	Tyk2_predicted		-2.41569	-2.82047	-2.20869	1	1	1	1	1	1	-6.29682	-7.96687	-11.2828	-4.00187	-3.01545	-4.61237	-4.43654	-4.83089	-2.97166	-3.88237
1377921_at	Etnk2	ethanolamine kinase 2	-2.34142	-2.6212	-2.55692	-1.27467	-1.3878	-1.34233	-2.02516	-1.57455	-1.52997	-5.60475	-13.8074	-6.40319	-3.60548	-2.95192	-5.49931	-5.33507	-3.65786	-4.70433	-4.19768
1374625_at	Hes6	hairy and enhancer of split 6 (Drosophila)	-2.07754	-2.21787	-2.15707	1	1	1	-1.76025	-1.57998	-1.40356	-7.32308	-8.29932	-8.84079	-2.69164	-2.53132	-4.4606	-4.36396	-4.14263	-3.57342	-3.80105
1375073_at	RGD1310271	similar to hypothetical protein MGC45873	1	-2.22827	-1.85761	-1.807	1	1	-2.50273	1	1	-6.27831	-4.49334	-6.46159	-2.7286	-2.34947	-7.81013	-5.72856	-3.36626	-3.26541	-14.0796
1389612_at	1389612_at		-1.64295	-2.06224	-1.89564	-1.38896	-1.36941	-1.36431	-1.81419	-1.52355	-1.77745	-5.89588	-5.01141	-7.68184	-3.10377	-2.50432	-4.77726	-3.9328	-3.04206	-3.07357	-4.75895
1394117_at	Acp2		1	1	1	1	1	1	1	1	1	1	1	-4.79292	-3.3296	-3.42933	-7.33502	-5.23476	-3.50222	-4.26522	-3.45014
1377013_at	Wbscr14		-1.64097	-3.37191	-2.44375	1	1	1	1	1	1	-6.54702	-5.29315	-7.93802	-1.85909	-1.89997	-4.87649	-4.05182	-4.08081	-3.52937	-4.57996
1391485_at	Hnf4a		-1.76102	-2.09897	-3.0367	1	1	1	-2.04461	-2.14554	-2.05494	-9.91671	-4.10111	-9.22561	-3.181	-3.42532	-2.78876	-3.38931	-2.76708	-4.2003	-4.07803
1382462_at	L2hgdh	L-2-hydroxyglutarate dehydrogenase	1	1	1	1	1	1	1	1	1	-13.0319	-10.3651	-11.7702	1	1	-4.52754	-6.66143	-5.90035	-11.9188	-2.69591
1381269_at	1381269_at		1	-4.14378	-2.42816	1	1	1	-2.81164	1	-1.9695	-10.7441	-8.53314	-7.86219	-7.22309	-3.12881	1	1	1	1	1
1375621_at	Sfxn5	sideroflexin 5	1	-2.23098	-2.44159	1	1	1	1	1	1	-7.87464	-4.63805	-10.0407	-3.03557	-3.39612	-2.74227	-4.33516	-4.46984	-3.21426	-4.2965
1370553_at	Stx2	syntaxin 2	1	-2.73803	-2.30812	1	1	1	1	1	1	-5.23506	1	-9.88789	-3.67452	-4.45389	-3.96531	-10.7871	-8.75216	1	1
1398130_at	Prkcbp1		1	1	1	1	1	1	1	1	1	1	1	-6.26749	1	1	1	1	1	1	1
1375656_at	Tecpr1	similar to RIKEN cDNA 2210010N04 gene	1	1	1	1	1	1	1	1	1	1	1	-6.61161	1	1	1	1	1	1	1
1388423_at	RGD1302996	hypothetical protein MGC:15854	1	1	1	1	1	1	-2.03089	1	-3.68363	-3.69914	-4.23823	-4.61042	1	-1.98442	-2.9569	-3.62961	-2.48682	-2.71566	-4.33549
1374648_at	Gpr155	G protein-coupled receptor 155	1	1	1	1	1	1	-3.0795	1	1	-8.55832	-5.32575	-8.65636	1	-3.88815	-6.92238	-9.07469	1	1	1
1388122_at	Gstp2	glutathione-S-transferase, pi 1	1	1	1	1	1	1	1	1	-4.20803	-6.42142	1	-8.66126	1	1	-6.4827	-5.08501	-3.56025	1	1
1369886_a_at	Cabp1	calcium binding protein 1	1	-3.69306	1	1	1	1	-2.85338	1	1	-7.13957	1	-3.25536	1	-3.20219	1	1	1	1	1
1388795_at	1388795_at		1	-2.19017	1	1	1	-2.23423	-2.71207	1	1	-8.53256	-8.71226	-4.73676	1	-3.02894	-2.0251	-8.18272	-3.40958	-5.74031	1
1392013_at	Depdc2_predicted		1	1	1	-1.6617	1	-1.54031	-2.55399	-1.95006	-1.74444	-3.55407	-4.10938	-4.34397	1	-2.99879	-5.4082	-4.01645	-3.12383	-4.67408	-3.85239
1382032_at	1382032_at		1	1	1	1	1	1	1	1	1	-6.88532	-5.50081	-5.30205	1	-2.77004	-5.16525	-10.3583	-3.50562	-2.21825	-4.10593
1391202_at	1391202_at		-3.30805	-2.74662	1	-2.66317	1	-2.82135	1	1	1	-4.21664	1	-3.1726	1	-2.3906	-3.92255	-3.09457	-3.19841	-4.75505	-4.37268
1371137_at	Acox2	acyl-Coenzyme A oxidase 2, branched chain	-2.02747	-1.67308	-2.0239	1	1	1.82239	-1.99837	-1.76288	-1.66229	-5.72661	-4.16123	-4.99648	-2.58446	1	-5.07245	-3.18003	-4.33257	-2.06146	-1.98961
1369723_at	Xylt2	xylosyltransferase II	1	1	1	1	1	1	-2.89824	1	1	-3.67995	1	-7.1607	1	-4.97991	-6.52009	-4.8414	1	1	1
1368403_at	Rbl2	retinoblastoma-like 2	-2.45998	-2.34449	-2.6636	1	1	1	-2.72957	1	-1.78512	-10.5722	-15.2128	-13.7812	-1.94102	-1.90531	-3.68834	-3.44523	-2.93528	-2.44259	-2.39884
1383279_at	Rcbtb2	regulator of chromosome condensation (RCC1) and BTB (POZ) domain containing protein 2	-1.66813	-1.43315	-1.48706	1	1	1	-2.08759	-1.80777	-1.6912	-6.81807	-12.0717	-6.56159	-3.66076	-2.7271	-6.81793	-6.42814	-3.37426	-4.05014	-3.89477
1371805_at	Ankrd46	ankyrin repeat domain 46	-1.5807	1	-1.77351	1	1	1	-1.95642	-1.72776	-1.57743	-3.26543	-3.12838	-2.91919	1	-2.10481	-4.32599	-3.48003	-3.89886	-3.00042	-3.42002
1368296_at	Slco2b1	solute carrier organic anion transporter family, member 2b1	-1.63646	-1.41502	-1.76638	1	1	-1.49194	-2.11356	-2.30186	-1.80948	-5.63452	1	-7.20171	-3.01306	-2.21054	-5.71423	-3.21123	-3.47244	-3.3868	-3.84427
1374758_at	1374758_at		1	-1.47057	-1.59121	1	1	-1.40185	-2.79306	-1.96102	-2.06073	-4.86807	-5.38294	-5.23261	-2.99301	-4.22727	-4.27719	-3.88654	-4.46581	-3.42051	-4.52622
1398358_a_at	Itgb5	integrin, beta 5	-1.57409	-1.71702	-1.39759	-1.48039	-1.432	-1.33054	-2.10779	-1.97622	-2.14739	-4.54257	-5.59342	-4.2057	-2.41432	-2.65447	-4.23925	-4.12581	-5.06031	-3.54523	-4.55959
1393915_at	Lpcat3	membrane bound O-acyltransferase domain containing 5	-1.63003	1	1	-1.88621	1	1	-2.10314	-1.69405	1	-3.21925	-5.5147	-5.99664	-2.34898	-2.7085	-4.486	-4.03609	-3.98549	-3.31313	-2.72831
1394392_at	RGD1307696	similar to dJ881L22.2 (novel protein)	1	-1.87216	1	1	-1.79215	1	-1.86719	-2.25172	-2.37996	-4.43488	-3.85116	-4.19924	-2.56257	-2.51567	-3.52303	-3.39714	-4.26023	-5.15494	-3.7826
1372925_at	Sirt3	sirtuin 3 (silent mating type information regulation 2, homolog) 3 (S. cerevisiae)	-3.89633	1	1	1	1	1	-2.42279	1	1	-5.21036	-6.23189	-8.29881	-2.10746	1	-3.12502	-3.3694	-3.47718	-3.57246	-2.3245
1377890_at	1377890_at		-1.68822	-1.83674	-1.53632	1	-1.85241	1	-2.20113	1	1	-4.1571	-8.68926	-8.721	-2.08412	-2.53404	-2.83221	-3.98288	-2.66589	-2.30896	-2.90594
1374244_at	LOC501038		1	1	1	1	-2.52062	1	1	1	1	-6.71729	-5.76069	-4.0149	-5.87447	-3.00921	-2.46715	-4.0352	-2.26999	-3.93531	-2.44811
1376813_at	Lpcat3	membrane bound O-acyltransferase domain containing 5	1	1	1	1	1	1	-1.87878	1	1	-4.57305	-2.35412	-5.58417	-2.67488	-3.33716	-4.01698	-3.00449	-3.10816	-3.47702	-3.22298
1374915_at	Gga1		-1.85878	-2.69785	1	1	1	1	-2.04271	-1.84634	1	-3.79431	-7.23313	-4.59163	-3.20633	-4.89833	-2.90931	-3.01634	-2.32254	-3.15432	-2.93854
1395815_at	1395815_at		1	-2.18899	1	-2.11706	1	1	-2.6063	-2.36534	1	-5.19089	1	-3.03282	-3.56883	1	-3.54963	-3.65698	-2.62043	-4.26076	-3.78149
1371744_at	LOC679203	similar to Negative elongation factor D (NELF-D) (TH1-like protein)	1	1	1	1	1	1	1	1	1	-10.8376	1	1	1	1	1	1	1	1	1
1394995_at	Cobll1_predicted		1	1	1	1	1	1	1	1	1	1	1	1	1	1	1	-8.69531	-6.29394	1	1
1374278_at	RGD1307696	similar to dJ881L22.2 (novel protein)	1	1	1	1	1	1	-2.80066	1	-1.86988	-5.62327	-4.15236	-9.04067	1	-2.40204	-3.28786	-3.38063	-3.11421	-4.40665	-4.07455
1376573_at	Rab34	RAB34, member of RAS oncogene family	1	1	1	1	1	1	1	1	1	1	1	-7.11812	1	1	-4.34143	-5.10214	-3.62984	-3.28284	-3.54283
1385904_at	Cirbp	cold inducible RNA binding protein	1	1	1	1	1	1	1	1	1	-4.564	1	-11.11	1	1	-4.35678	-6.51398	1	1	1
1369157_at	Pde3b	phosphodiesterase 3B, cGMP-inhibited	1	-1.4505	-1.59492	1	1	1	-1.97567	-2.01893	-1.46785	-5.69453	-7.20686	-5.5312	-3.63856	-3.56871	-4.54037	-4.55074	-3.88626	-2.3319	-3.76303
1389412_at	LOC499414		1	1	1	1	1	1	-2.17796	1	1	-6.42155	-5.64273	-6.20908	-2.25338	-2.43168	-4.77318	-5.80843	-4.7562	-2.85473	-3.23118
1373578_at	Trim2	tripartite motif protein 2	1	1	1	1	1	1	-2.62721	-2.40833	1	-9.11752	-6.76623	-5.29669	-3.09538	-2.03458	-3.67661	-4.51741	-4.05019	-3.27191	-3.96571
1376571_at	Tmem42	transmembrane protein 42	1	-2.13639	1	1	1	1	1	1	1	-7.64029	-12.4212	-10.9451	1	1	-4.15099	-5.95856	-4.76604	-2.78919	-3.50692
1371931_at	Gtf2i	general transcription factor II I	1	-2.08798	-1.64905	1	1	1	1	1	1	-5.80899	-11.5933	-9.50022	1	1	-3.83868	-4.65039	-4.33608	-4.16516	-4.69187
1371549_at	Wdr23	WD repeat domain 23	-1.43526	-1.3735	-1.33146	1	1	1	-2.01278	-1.37647	-1.4596	-5.3347	-8.52719	-6.2627	-2.48442	-1.94971	-3.35622	-3.43178	-2.6781	-2.73544	-2.52079
1372960_a_at	Xylt2	xylosyltransferase II	1	1	1	1	1	1	1	1	1	-4.20561	1	-4.07842	-2.6933	-1.94543	-4.09239	-4.21113	-3.26171	-2.96877	-3.56002
1393419_at	Rcbtb2	regulator of chromosome condensation (RCC1) and BTB (POZ) domain containing protein 2	1	1	1	1	1	1	-2.18769	1	1	-5.26386	-11.3147	-3.96691	-3.049	-2.63655	-4.68904	-3.28742	-2.61819	-4.03036	-4.16664
1390851_at	Lactb2	Lactamase, beta 2	1	1	1	1	1	1	-1.49411	-1.40583	1	-3.45178	-3.75565	-3.43776	-2.07788	-1.4819	-3.94601	-4.08184	-3.86988	-4.15101	-4.06957
1376771_at	Ppm1l	protein phosphatase 1 (formerly 2C)-like	1	1	1	1	1	1	1	1	1	1	1	1	1	1	1	1	1	-9.29155	1
1390591_at	Slc17a3	solute carrier family 17 (sodium phosphate), member 3	-1.676	-2.83125	-2.41079	-2.06363	1	1	-1.98766	-1.84161	-2.28381	-2.76551	-2.79103	-3.42735	-3.3446	-2.08269	1	-2.24136	-2.28771	1	-2.70192
1374493_at	1374493_at		1	-2.34869	1	-2.13067	1	-2.08756	-2.22066	1	1	-3.94689	1	-6.22641	-2.58971	-5.28045	-2.68001	-2.83311	1	1	1
1369633_at	Cxcl12	chemokine (C-X-C motif) ligand 12	-1.47334	-1.85027	-1.76468	-1.87148	-1.83544	-2.12875	-1.82478	1	-1.43135	-4.40034	-4.02269	-4.02815	-4.14003	-3.51604	-3.49319	-3.21429	-3.07013	-2.00849	-3.04118
1375418_at	Trrap	transformation/transcription domain-associated protein	1	-2.84396	1	-2.05225	1	-2.04928	-2.06772	1	1	-3.65383	1	-5.31225	-2.21563	-2.91133	-2.72048	1	1	1	-4.0156
1387655_at	Cxcl12	chemokine (C-X-C motif) ligand 12	-1.67286	-1.93273	-1.99254	-1.93631	-2.03372	-1.95062	-2.70431	-1.76052	-2.01382	-4.32516	-2.46815	-3.6303	-5.15803	-3.70524	-3.08473	-2.13179	-2.49504	-1.83347	-2.437
1392338_at	1392338_at		1	1	1	1	1	1	1	1	1	1	1	1	-5.77972	1	1	1	1	1	-6.54028
1390399_at	Crebl2	cAMP responsive element binding protein-like 2	1	1	1	1	1	1	1	1	1	-8.23773	1	-13.4352	1	1	1	-3.12766	-3.95728	1	-6.08053
1375231_a_at	Cxxc5	CXXC finger 5	1	-2.58623	1	1	1	-2.04769	1	1	1	-2.31819	-2.57354	-2.13275	-2.70508	-3.01663	-3.25313	-5.27588	-3.83853	-3.42787	-3.40055
1393062_at	1393062_at		1	1	-2.56668	1	1	1	-2.34734	1	1	-2.67284	1	-4.38349	1	1	-2.59094	-4.06293	-2.66114	1	1
1394576_at	1394576_at		1	1	1	1	1	1	1	1	1	-2.29737	1	-3.08656	-2.26084	-2.23662	1	1	1	1	1
1385931_at	Hook3	hook homolog 3 (Drosophila)	1	1	1	1	1	1	1	1	1	-2.82944	1	-2.78321	1	1	1	-4.82476	-4.02267	1	1
1374350_at	1374350_at		1	1	1	1	1	1	1	1	1	-3.88699	1	-3.43002	1	1	1	-3.10385	-3.0399	1	-4.212
1374791_at	Acot8		1	1	-2.22467	1	1	1	1	1	1	-2.42302	1	1	1	-2.36885	1	1	-5.89134	-4.98216	1
1374709_at	1374709_at		1	-2.16126	1	1	1	1	-1.69259	1	1	-2.17818	1	-2.20405	-1.89581	-1.96855	1	-2.50732	-2.51243	-2.95216	-2.7634
1379118_at	1379118_at		1	1	1	1	1	1	1	1	1	-2.28682	1	-3.28761	-2.0457	1	-2.39904	-2.17102	1	-1.99023	1
1377472_at	Extl1	exostoses (multiple)-like 1	1	-2.57255	-2.16321	1	1	1	1	1	1	-2.96665	1	-2.8049	1	-2.40692	1	1	1	1	1
1373399_at	Wdr6	WD repeat domain 6	-2.45066	-2.08138	-2.04437	1	1	1	-2.02881	1	-1.63467	-3.09148	-3.14484	-2.81828	-1.75197	-1.83319	-1.90313	-2.57725	-2.04468	-1.99478	-2.16671
1373253_at	Acbd4	acyl-Coenzyme A binding domain containing 4	-2.17583	-1.8339	-1.76429	1	1	1	-1.82188	1	-1.75588	-3.06028	-3.43923	-2.7156	-2.01525	-2.13036	1	1	1	1	1
1398233_at	1398233_at		1	1	-1.80781	1	1	1	1	1	1	-2.8064	1	-2.71577	-2.00116	-1.80557	-2.59265	-2.3752	-2.92952	1	-2.82654
1393142_at	Cep70	centrosomal protein 70	1	1	1	1	1	1	1	1	-1.88627	-1.95218	1	-2.74491	-2.35704	-2.17971	-2.48963	-2.05987	-2.08387	-2.49678	-2.74437
1380254_at	1380254_at		1	1	-2.10805	1	1	1	-2.145	1	-2.02536	-2.96878	1	-3.94963	-2.28418	1	-2.16919	-2.37525	1	-2.86387	-4.76359
1383060_at	Gkap1	G kinase anchoring protein 1	-1.82115	-2.30963	1	1	1	1	1	1	1	-3.93736	1	-4.60624	-1.83294	-2.3786	-1.7948	-2.17434	-2.42188	-2.69034	-2.95887
1374001_at	1374001_at		1	-2.42798	-2.32935	1	1	1	1	1	1	-3.13235	-4.89799	-3.61657	-2.02612	1	-2.45656	-2.4947	-3.18918	1	1
1377084_at	Fads6_predicted		-1.44051	-1.73271	-1.6612	1	1	1	-1.97193	-1.49962	-1.55739	-3.36711	-3.43119	-3.38022	-2.6014	-2.45989	-3.07308	-2.58069	-2.51885	-2.43116	-2.76323
1371833_at	Bri3	brain protein I3	-1.6317	-1.66768	-1.56914	1	1	-1.48898	-1.81757	-1.87625	-1.66441	-3.16387	-3.39226	-3.061	-2.21366	-2.8049	-3.28726	-2.63023	-2.45246	-2.11834	-2.87637
1369291_at	Agtr1a	angiotensin II receptor, type 1a	-1.58617	-1.54966	-1.37795	-1.68405	1	1	-1.80488	-1.65565	-1.53046	-3.57523	-3.06043	-2.99405	-3.00258	-2.03837	-2.92707	-2.43574	-2.81127	-2.64953	-3.40824
1385074_at	Smarca2	SWI/SNF related, matrix associated, actin dependent regulator of chromatin, subfamily a, member 2	1	1	1	1	1	1	1	1	1	-3.08002	1	-3.2662	1	-2.3124	-2.09047	-2.55635	-2.4904	-2.43364	-4.02122
1383637_at	1383637_at		1	-1.92672	-1.8017	-1.5992	-1.50914	1	-1.4847	1	1	-2.64659	-3.70096	-4.13055	-5.48305	-4.72113	-1.99463	-3.20224	-2.48665	-2.89288	-1.88882
1372328_at	Klc4	kinesin light chain 4	-1.56415	-2.01016	-1.9298	1	1	1	-1.86392	-1.55486	-1.83837	-2.60372	1	-3.4142	-2.11625	-2.09978	-2.2523	-3.1889	-2.57531	-2.04181	-2.35672
1385093_at	RGD1565033	similar to hypothetical protein LOC284018 isoform b	-1.95204	1	1	1	1	1	1	1	1	-2.92919	1	-3.06351	-1.93698	-2.29569	-2.56556	-3.1414	-3.62692	-2.27672	-3.38712
1390672_at	Rprm	reprimo, TP53 dependent G2 arrest mediator candidate	1	1	-3.56883	1	1	1	1	1	1	1	-7.51928	-4.88557	1	1	1	-5.30994	-4.90307	1	1
1376337_at	Smarca2	SWI/SNF related, matrix associated, actin dependent regulator of chromatin, subfamily a, member 2	1	-1.4376	-1.51322	1	1	1	-1.61319	-1.51998	1	-2.70146	-3.15908	-2.62247	1	-2.15929	-2.84704	-3.34625	-2.87455	-2.72311	-3.36082
1374767_at	Npepo	similar to hypothetical protein FLJ14675	1	1	1	1	1	1	1	1	1	-3.53233	-11.6609	-3.18361	1	1	-2.6619	-3.37603	-2.67927	1	-3.68485
1377807_a_at	Iqwd1	IQ motif and WD repeats 1	1	1	1	1	1	1	1	1	1	-3.1369	-6.10229	-5.44589	1	-2.75616	-3.30268	-3.38249	-2.88423	-3.89503	-2.49032
1375869_at	Ulk1	Unc-51 like kinase 1 (C. elegans)	1	1	1	1	1	1	1	1	-1.87744	-3.46398	-4.69385	-4.77251	1	1	-3.67299	-6.81825	-2.73035	-2.49749	-2.9586
1379909_at	Gkap1	G kinase anchoring protein 1	1	-1.63694	-1.46275	1	1	1	1	-1.75743	1	-2.95116	-4.22531	-4.47153	1	-1.68919	-2.64382	-3.21261	-2.8304	-3.07934	-2.10594
1382874_at	Npl	N-acetylneuraminate pyruvate lyase	1	1	1	1	1	1	1	1	1	1	1	1	1	1	1	-5.80943	1	1	1
1383498_at	1383498_at		1	1	-1.58143	1	1	-1.81478	-1.5482	1	1	-3.51625	-4.06072	-4.06418	1	-2.79062	1	-2.79404	-2.40592	-1.77156	-2.00342
1372221_at	A_42_P567075		1	1	1	1	1	1	1	1	1	-2.4116	1	-4.2674	-2.79488	-3.99607	-3.20729	-3.75386	-2.63874	-2.46921	-2.32543
1399109_at	1399109_at		-1.62499	1	-1.72085	1	1	-1.56789	1	1	1	-2.58836	-5.89109	-3.73035	1	-2.08067	-3.23136	-3.29886	-2.3348	-1.90483	-2.44387
1383443_at	LOC498685	similar to UPF0308 protein C9orf21	1	-1.75807	1	-1.75882	1	1	1	1	1	-3.59495	-2.98303	-3.31357	-2.08802	-1.6907	-2.76376	-3.41912	-2.65732	-1.81428	-2.50993
1372814_at	Sft2d2	SFT2 domain containing 2	1	1	1	1	1	1	1	1	1	-3.3721	1	-5.29798	-2.81236	1	-2.84586	1	-4.46548	-2.22259	-2.63307
1368295_at	Slco2b1	solute carrier organic anion transporter family, member 2b1	-1.49447	-1.24335	-1.4443	1	1	-1.25126	-1.49048	-1.34475	-1.43098	-2.69658	-2.11298	-3.25098	-1.94386	-1.45634	-2.90351	-2.28006	-2.71289	-2.27083	-2.69954
1369200_at	Nt5e	5' nucleotidase, ecto	-1.45202	-1.52581	-1.59761	-1.20846	-1.18741	-1.29168	-1.52048	-1.29713	-1.51772	-2.63903	-4.14259	-2.82556	-1.66091	-1.62198	-2.92918	-2.6358	-2.73505	-2.70946	-4.07324
1380283_at	Tshz1	teashirt zinc finger family member 1	1	1	1	-1.80939	1	-1.928	-2.00195	1	1	-2.47726	1	-3.1414	-1.81706	-1.88597	-3.07587	-2.75182	-2.61189	-2.30286	-4.93523
1392929_at	RGD1565616	RGD1565616	1	1	-1.90338	1	1	1	1	1	1	-5.09053	-7.69278	-3.40014	-2.53843	-2.28999	-3.07854	-3.03953	-3.61813	-2.69569	-2.33089
1379342_at	Znf692	zinc finger protein 692	1	1	1	1	1	1	1	1	1	-4.46958	1	1	1	1	-5.96926	1	1	1	1
1367896_at	Car3	carbonic anhydrase 3	1	-2.24405	-4.04798	-1.71256	1	1	-1.28818	-3.4697	-1.74037	-2.39423	-4.13326	-3.26631	1	-1.71765	1	-1.95705	-7.98768	1	-3.52472
1386977_at	Car3	carbonic anhydrase 3	1	-3.76947	-7.5641	-2.29939	1	1	-1.91799	-6.14609	-3.04814	-4.74101	-6.95039	-7.04169	1	-2.41104	1	-3.12468	-12.0265	1	-5.44284
1379203_at	Tfdp2	transcription factor Dp 2	1	1	1	1	1	1	1	1	1	1	1	-5.53525	1	1	1	1	1	1	1
1377423_at	RGD1560471_predicted		1	1	1	1	1	1	1	1	1	1	1	1	1	1	1	1	-5.40957	1	1
1373613_at	Slc48a1	similar to RIKEN cDNA 4930570C03	1	1	1	1	1	1	1	1	1	-4.02248	1	-3.89583	1	1	-3.9325	-3.22804	1	1	1
1372536_at	Cabc1	chaperone, ABC1 activity of bc1 complex like (S. pombe) /// presenilin 2	-1.60039	-1.54812	-1.92835	-1.47246	1	-1.48147	-3.16528	-1.60883	-2.28246	-3.95638	-7.31583	-5.51848	1.48761	-2.89637	-1.89177	-2.37175	-2.58695	-2.23467	-3.21141
1377402_at	Cdk10	cyclin-dependent kinase (CDC2-like) 10	1	1	1	1	1	1	1	1	1	1	1	-5.48653	1	1	-5.06392	-3.88791	-2.94252	1	-4.60768
1386906_a_at	40430	septin 9	1	1	1	1	1	1	1	1	1	-4.38741	1	-5.5027	-4.67065	-3.71442	-3.69222	1	1	1	1
1388725_at	Leprot	leptin receptor overlapping transcript	-1.55328	-2.07783	-2.07574	-1.50992	1	-1.49653	1	1	1	-3.77319	-4.97934	-4.48873	-1.96504	-2.50997	-2.88121	-2.78553	-2.11275	-1.9236	-3.10679
1383555_at	RGD1560258	similar to RIKEN cDNA 4930579G22	1	1	1	1	1	1	1	1	1	-3.52516	-13.0087	-3.65396	1	-2.26675	-4.86713	1	1	1	-3.28028
1391005_at	Fbxl4	F-box and leucine-rich repeat protein 4	1	1	1	1	1	1	1	1	1	-4.27103	1	-9.5256	1	1	1	-3.31525	1	-2.30733	-4.95825
1390997_at	Slc26a1		-1.71601	-1.85989	-1.79067	1	1	-1.78987	-2.48181	1	-2.04147	-6.22192	-6.97407	-5.88969	-2.2353	-1.91738	-3.00697	-2.68896	-2.08384	-1.6788	-2.55527
1372462_at	Acat2	acetyl-Coenzyme A acetyltransferase 2	-2.2433	-2.07015	-2.74173	-2.22174	1	1	1	1	1	-3.30844	-5.93946	-4.19756	-2.32647	-1.8732	-2.35509	-2.85513	1	1	-2.24111
1390857_at	Xylb	xylulokinase homolog (H. influenzae)	-1.81264	-1.65014	-1.64265	1	-1.51446	1	-1.4422	-1.59616	-1.81663	-4.40352	-4.15083	-4.39222	-3.54907	-2.29327	-3.11774	-2.45021	-2.12744	-1.84739	-2.6471
1370322_at	Stk16	serine/threonine kinase 16	-1.38374	-1.56837	-1.54759	1	1	1	-1.43063	-1.56922	-1.38622	-3.47889	-3.98288	-4.22836	-2.57214	-1.89246	-1.78768	-2.06437	-2.24152	-2.0496	1
1374566_at	Nisch		1	1	1	1	1	1	1	1	1	1	1	-5.27357	1	1	1	1	1	1	1
1372494_a_at	Hmg20b	high mobility group 20 B	1	1	1	1	1	1	1	1	-1.64873	-3.07471	-2.94745	-2.90335	-2.29734	-2.8452	-2.45333	1	1	1	1
1399129_at	RGD1309765	similar to hypothetical protein	1	1	1	1	1	1	1	1	1	-3.59062	-7.78037	-5.71583	1	1	1	1	1	1	-3.8238
1392062_a_at	rCG_34541		1	1	1	1	1	1	-3.57818	1	1	1	1	-3.25031	1	1	-2.80511	-2.84349	-2.49175	1	1
1389107_at	Cgnl1	cingulin-like 1	-1.52412	-1.7886	-1.52488	1	1	1	-1.71917	-1.43185	-1.80845	-4.2888	-5.90306	-5.97074	-3.4093	-2.06575	-1.84619	-1.84396	-1.66988	-1.46842	-2.14188
1371560_at	Irf3	interferon regulatory factor 3 /// serine/threonine kinase 22 substrate 1	-1.72787	-1.86058	-1.83184	1	1	1	-1.59121	-1.47063	1	-4.3197	-6.79789	-4.72519	-2.66688	-2.30237	-2.01293	-2.57974	-2.01013	-2.06142	-1.90334
1368538_at	Exoc7	exocyst complex component 7	-1.98541	-2.05339	-1.94187	1	1	1	1	1	1	-3.70782	1	-5.26604	1	-2.12614	-2.34697	-2.07264	-1.90797	-2.17799	1
1386618_at	Flywch1	FLYWCH-type zinc finger 1	1	1	1	1	1	1	1	1	1	-3.25299	1	-7.38147	1	-3.69165	1	1	1	1	1
1382051_at	Hscb	HscB iron-sulfur cluster co-chaperone homolog (E. coli)	1	1	1	1	1	1	1	1	1	-3.88853	1	-5.53048	1	-2.40705	1	1	1	1	1
1375954_at	S100a13	S100 calcium binding protein A13	1	1	1	1	1	1	1	1	1	1	1	-6.43526	1	1	1	1	1	1	1
1397613_at	Tmem63b	transmembrane protein 63b	1	1	1	1	1	1	1	1	1	1	1	-4.66055	-6.04874	1	1	1	1	1	1
1381832_at	Pycrl	pyrroline-5-carboxylate reductase-like	1	1	1	1	1	1	1	1	1	-3.96338	-3.2369	-5.84409	1	-1.9721	-5.44325	-2.17042	-2.50051	-2.52641	-1.7761
1371604_at	Mrpl34	mitochondrial ribosomal protein L34	1	1	1	1	1	1	-1.51292	1	1	-3.06272	-3.63285	-3.44665	1	-2.28666	-2.56729	-2.90239	-2.24633	-1.78977	1
1383572_at	Zdhhc6	zinc finger, DHHC domain containing 6	-1.31017	1	-1.46676	1	1	1	-1.34536	-1.37927	-1.23769	-3.06199	-4.07397	-3.43191	-2.44133	-1.86217	-2.30686	-2.32244	-2.29435	-2.01482	-2.38315
1387503_at	Cpn1	carboxypeptidase N, polypeptide 1	1	1	1	1	1	1	1	1	1	-4.41719	-4.60289	-2.9144	-4.27668	-2.10331	-2.38863	-2.79614	-2.20701	-2.70615	-2.11464
1372942_at	Exosc5	exosome component 5	1	1	1	1	1	1	1	1	1	-3.70336	-9.30243	-3.87386	1	1	-3.3467	-2.91168	-2.47729	-4.27184	-2.2809
1382136_at	Slc2a9	solute carrier family 2 (facilitated glucose transporter), member 9	1	1	1	1	1	1	1	1	1	-2.77833	-3.74196	-2.99288	-2.16045	1	-3.65983	-2.9616	-2.44533	-2.30489	-3.11142
1374491_at	Cmtm8	CKLF-like MARVEL transmembrane domain containing 8	1	-1.85309	1	1	1	1	1	1	1	-3.52099	-4.25461	-2.80625	-2.83116	1	-2.36391	-2.97541	-2.04567	-3.46033	-2.87104
1382318_at	Pctk3		1	1	1	1	1	1	1	1	1	1	1	-3.70999	1	-2.13987	1	-2.61147	-2.63155	1	1
1374860_at	LOC684993	hypothetical protein LOC684993	1	-2.11299	1	1	1	1	1	1	1	-4.28069	-5.9183	-4.44789	1	1	-2.74262	-2.09718	1	-2.71125	-3.17126
1370374_at	Steap3	STEAP family member 3	-1.76963	1	1	1	1	1	1	1	1	-3.05115	-4.38787	-2.44586	1	-2.13149	-2.22994	1	1	-2.459	1
1382330_at	Ddef2	development and differentiation enhancing factor 2	1	-3.07739	-4.68732	1	1	1	1	1	1	-7.04151	1	-6.07636	1	-2.02406	-2.05735	-2.68562	-2.56314	-2.13403	-2.52025
1388751_at	Cap2		1	1	-1.8402	1	1	1	1	1	1	-3.06206	-3.20415	-3.63753	-2.42383	-2.04373	-2.20011	-2.71422	-2.51424	-2.21076	-2.31333
1369909_s_at	Tmem150	transmembrane protein 150	-1.60052	-1.596	-1.4518	1	1	-1.28189	-1.31466	-1.4439	1	-6.50441	-4.57584	-3.93666	-2.29066	-2.14706	-2.49594	-2.19996	-2.55179	-1.96308	-2.10978
1383553_at	Nlrx1	NLR family member X1	1	1	1	1	1	1	1	1	1	-7.59297	1	1	1	1	-2.67443	-2.50188	-3.28288	1	-3.14127
1384743_at	1384743_at		1	-1.98767	1	1	1	1	-1.78432	-2.02156	1	-4.50707	-8.3764	-3.68349	-2.27508	-2.34726	-2.13072	-2.79375	-3.48675	-3.29411	-6.19823
1376567_at	Mad1l1	mitotic arrest deficient 1-like 1	1	1	1	1	1	1	1	1	1	-4.85614	1	-4.75515	-3.22765	-3.27301	-4.7136	-2.81159	-3.80248	1	-5.07797
1374486_at	RGD1309453	Similar to hypothetical protein FLJ32884	1	1	1	1	1	1	1	1	1	-3.41217	1	-4.28616	1	-2.50816	-3.39766	1	-2.5568	1	1
1373710_at	1373710_at		-1.69498	-1.5961	-1.64465	1	1	1	-2.14933	-1.66701	-1.8682	-4.50011	-4.77165	-4.19739	-2.1524	-1.51168	-2.13903	-2.23449	-2.45402	-1.56072	-3.48701
1389219_at	LOC679692	Similar to lysophosphatidylglycerol acyltransferase 1	1	1	1	1	1	1	1	1	-1.68723	-4.1559	-4.44266	-3.63161	-2.17557	1	-1.96107	-2.4503	-2.67046	-1.73323	-2.26872
1396300_at	Afmid	similar to kynurenine formamidase	-1.70314	1	-2.40684	1	1	1	1	-2.411	1	-4.3934	-7.63712	-13.4179	-3.75544	-1.79015	-1.85578	-3.54634	-6.1179	-2.69364	-2.83491
1396301_x_at	Afmid	similar to kynurenine formamidase	1	1	-1.85558	1	1	1	1	-1.81006	1	-2.91318	-8.97037	-4.55974	-2.3762	1	-1.6544	-3.50285	-4.29645	-1.94837	-2.8964
1385667_x_at	1385667_x_at		1	1	1	1	1	1	1	1	1	-5.86538	1	-5.82308	1	-6.33584	-3.20309	1	1	1	-7.88762
1386129_at	Ing2	inhibitor of growth family, member 2	1	1	1	1	1	1	1	1	1	-6.39176	1	-9.81831	1	1	1	1	-3.78927	1	1
1379544_at	LOC689253		1	-2.29668	1	1	1	1	-2.16885	1	1	-4.53947	-5.16325	-5.49803	1	-3.29228	-2.1006	-2.27008	-2.0442	1	-2.29538
1370204_at	Frag1	FGF receptor activating protein 1	1	1	1	1	1	1	-1.92156	1	1	-6.14783	-8.59507	-6.22932	-2.52996	-2.9205	-3.34955	1	1	1	-3.52883
1390289_at	Fig4	FIG4 homolog (S. cerevisiae)	1	1	1	1	1	1	1	1	1	-4.1917	1	-4.65058	1	1	-2.83921	1	1	1	-2.97956
1394580_at	Tusc4	tumor suppressor candidate 4	1	1	1	1	1	1	1	1	1	1	1	1	1	-4.57366	1	1	1	1	1
1385365_at	Extl1	exostoses (multiple)-like 1	-2.68856	-4.4797	-4.4347	1	1	1	1	1	1	-4.90107	-4.00175	-7.68516	-2.25699	-3.45672	1	-3.14278	1	-5.17533	1
1376892_at	Gria3	glutamate receptor, ionotropic, AMPA3 (alpha 3)	1	1	1	1	1	-2.80632	1	1	1	-11.9863	1	-3.98106	-3.14555	-3.05822	1	1	1	1	1
1382022_at	RGD1308640_predicted		1	1	1	1	1	1	1	1	1	-4.09856	1	-5.72389	1	1	1	1	1	1	-2.67388
1393458_s_at	Phf14	PHD finger protein 14	1	1	1	1	1	1	1	1	1	-10.7109	1	-9.60962	1	1	1	1	1	1	1
1395122_s_at	Cdk10	cyclin-dependent kinase (CDC2-like) 10	1	1	1	1	1	1	1	1	1	-7.97566	1	-7.48094	1	1	1	1	1	1	1
1385458_a_at	RGD1306959	similar to C11orf17 protein	1	1	1	1	1	1	1	1	1	1	1	-7.06182	1	1	1	-3.52774	1	1	1
1378804_at	Fign_predicted		1	1	1	1	1	1	1	1	1	-7.77635	1	1	1	1	1	1	1	1	1
1376158_at	1376158_at		1	1	1	1	1	1	1	1	1	1	1	-7.5208	1	1	1	1	1	1	1
1390543_at	1390543_at		-1.77025	-1.7369	-1.80964	1	1	1	-2.74289	-1.74581	-2.24732	-3.6404	-8.62698	-4.71311	-2.94848	-2.22996	-1.61088	-1.80575	-1.49522	1	-2.24508
1388501_at	MGC125239	hypothetical protein LOC686179	1	-1.7782	-1.78781	1	1	1	-2.24485	-2.30603	-1.87967	-5.20013	-4.41213	-5.05807	-2.0663	-2.39475	1	1	1	1	-1.78282
1370981_at	Rxrg	retinoid X receptor gamma	-1.48579	-1.69148	-2.20019	1	1	1	-2.81038	-1.67089	-2.00808	-6.59805	-4.39057	-5.68031	-2.33659	-3.08109	-2.71792	-1.55527	1	1	-1.72329
1383314_at	Tmem51	transmembrane protein 51	1	-3.88371	1	1	-2.56597	1	1	1	1	-3.17545	1	-3.78027	-5.69428	-4.35353	1	1	1	1	1
1377751_at	1377751_at		1	-2.14085	-1.89362	1	-1.75348	1	-1.96095	-2.13912	-1.71008	-2.84399	-5.61012	-2.86184	-3.09359	-2.39076	-1.78142	-1.93445	-1.82483	-1.42032	-1.86614
1373952_at	Prkag2	protein kinase, AMP-activated, gamma 2 non-catalytic subunit	1	1	1	1	1	1	1	1	1	1	1	1	1	1	-3.70604	-5.82802	-5.24182	-5.3335	-2.84593
1370231_at	Gtf3c1	general transcription factor III C 1	1	1	1	-1.4778	1	-1.72284	-2.11789	-1.52829	1	-3.86339	-20.1861	-3.57895	-1.90044	-1.7635	-3.49421	-5.46666	-3.19159	-3.27756	-3.015
1395488_at	Msh3	mutS homolog 3 (E. coli)	1	1	1	1	1	1	1	1	1	-4.6336	1	-3.84409	-2.22449	1	-2.59227	-4.79329	-2.92507	-5.89145	-4.14376
1395948_at	1395948_at		1	1	1	1	1	-2.28435	1	1	1	-2.84419	1	-3.33732	-2.67243	-2.09916	-2.68262	-2.40868	-1.91045	-3.02345	-2.6385
1379901_at	Tbc1d17	TBC1 domain family, member 17	1	1	1	1	1	1	1	1	1	-3.40693	1	-3.66551	1	1	-2.67343	-2.8749	-2.49119	-5.41136	-2.565
1380332_at	Abhd6		1	1	1	1	1	1	1	1	1	-2.8247	1	-5.25229	1	1	-5.24089	-3.36607	-3.30626	-3.74651	-6.7856
1396062_at	Pdp2		1	1	1	1	1	1	1	1	1	1	1	1	1	1	-3.47114	-4.00064	-3.2898	-3.38269	-2.48941
1376134_at	Mri1	similar to hypothetical protein MGC3207	1	-1.79118	-1.95825	1	1	1	1	1	1	-2.97143	-8.79059	-2.908	-2.2054	1	-3.48969	-2.55686	-2.4123	-3.28344	1
1371986_at	Anp32a		1	1	-1.94568	1	-1.74966	-2.03551	1	1	1	-2.69666	-5.60388	-3.04168	-2.45631	-2.06976	-2.96596	-3.07748	-3.50586	-3.02424	-3.9014
1374861_at	Tle2	transducin-like enhancer of split 2, homolog of Drosophila E(spl)	-2.63424	-2.96246	-2.84092	1	1	1	1	1	1	-2.27857	1	1	1	1	-2.47265	-3.64663	-3.07554	-3.59523	-2.55262
1394107_at	Tbl1xr1	transducin (beta)-like 1X-linked receptor 1	1	1	-2.87368	1	1	1	1	1	1	-5.94271	1	-2.74707	1	1	-5.53733	-4.24444	-3.46519	-2.68381	-5.94404
1391378_at	Lpin2_predicted		1	-1.74107	-2.46075	1	1	1	1	1	1	-2.66332	1	1	-1.79149	1	-5.62099	-3.70274	-2.76018	-3.89398	-6.27375
1384112_at	Nt5e	5' nucleotidase, ecto	-1.44102	-1.48059	-1.62614	-1.18156	-1.29752	1	-1.3998	-1.34107	-1.41812	-2.68791	-3.48066	-3.18616	-1.69829	-1.62132	-2.62949	-2.797	-2.87548	-3.22335	-5.71976
1367906_at	Acp2	acid phosphatase 2, lysosomal	1	-1.61635	-1.54675	1	1	1	1	-1.31499	1	-2.34058	-3.56176	-2.61053	-2.12066	-1.62191	-3.56609	-3.09498	-3.06695	-2.54527	-3.26643
1377738_a_at	Cyhr1	cysteine and histidine rich 1	1	1	1	1	1	1	1	1	1	-2.35182	1	-2.83085	1	1	-3.13682	-2.71246	-2.43937	-2.86483	-3.04827
1389235_at	Icam2	intercellular adhesion molecule 2	1	1	1	1	1	1	-1.67344	-1.54045	1	-2.75213	-2.41987	-2.46463	1	1	-3.58111	-4.1728	-4.07056	-5.11951	-3.38283
1396113_at	Abhd14a	abhydrolase domain containing 14A	1	1	1	1	1	1	1	1	1	1	1	1	1	1	-3.44273	-2.95264	-3.36621	-8.80127	1
1377053_at	RGD1310810	similar to RIKEN cDNA 4930444A02	1	1	1	1	1	1	1	1	1	-2.56256	-3.24626	-2.79504	1	1	-3.61569	-3.23393	1	-2.74955	-3.75705
1387365_at	Nr1h3	nuclear receptor subfamily 1, group H, member 3	-1.33032	-1.84987	-1.94072	-1.2885	1	1	1	1	1	-2.72788	-4.74385	-2.84588	-2.29592	-1.44632	-2.75312	-3.59477	-4.01153	-2.85198	-2.88397
1375417_at	Prkcbp1	protein kinase C binding protein 1	1	1	1	1	1	1	1	1	1	-2.6177	1	-2.93333	1	1	-3.55663	-3.58433	-3.07009	-3.33275	-3.47321
1391744_at	1391744_at		1	1	1	-1.66117	1	-2.31877	1	1	1	-6.33621	-2.49613	-2.60474	-1.74027	1	-2.78513	-3.75996	-4.50443	-4.92196	-3.40637
1384143_at	Cgn	cingulin	1	-1.73961	-1.49248	1	1	1	1	1	1	-3.1114	1	-3.97551	-2.01795	1	-3.92879	-2.43325	-4.03944	-3.65264	-2.66995
1392360_at	RGD1565360_predicted		1	1	1	1	1	1	1	1	1	1	1	-3.8175	1	1	-2.5725	-3.12549	-3.91831	1	1
1389967_at	Arl6ip1	ADP-ribosylation factor-like 6 interacting protein 1	1	-1.68051	1	1	1	1	1	1	1	-4.04927	-2.94179	-4.33513	-3.45934	-2.20645	-3.44575	-3.93117	-3.87529	-2.83626	-3.93525
1374570_at	Agpat2	1-acylglycerol-3-phosphate O-acyltransferase 2 (lysophosphatidic acid acyltransferase, beta)	1	1	1	1	1	1	1	-1.62127	-1.55416	-3.30495	-6.18333	-3.77176	-2.13648	-1.60039	-2.66899	-4.59652	-2.94642	-6.0732	-2.97033
1391549_at	Dcun1d4	DCN1, defective in cullin neddylation 1, domain containing 4 (S. cerevisiae)	1	1	1	1	1	1	1	1	1	-3.61726	1	-4.2928	-3.13764	1	1	-2.71001	-3.1538	-3.65899	1
1380433_at	1380433_at		1	1	1	1	1	1	1	1	1	-4.18339	1	1	1	1	1	-5.11112	1	1	1
1370509_at	Pdp2	pyruvate dehydrogenase phosphatase isoenzyme 2	1	-1.82117	1	1	1	1	1	1	1	-3.86262	-2.75583	-4.21412	-2.63428	-2.44899	-5.30692	-3.43849	-4.41999	-6.01057	-3.12667
1374554_at	RGD1308048	similar to HT014	1	1	1	1	1	1	1	1	1	-7.41829	-2.52408	-3.90953	1	1	-3.13681	-2.65399	-2.93506	-3.62012	-2.63636
1372681_at	Stxbp6_predicted		1	-1.66721	-1.46631	1	1	1	1	1	1	-3.16274	-3.5543	-5.0836	-1.70491	-2.32995	-4.19201	-4.25445	-2.99545	-4.30073	-3.56721
1389333_at	Fbxo3	F-box protein 3	-1.35438	-1.45882	-1.2325	1	1	1	-1.40214	-1.38566	-1.2994	-3.88276	-3.90741	-4.28504	-1.57271	-1.89883	-3.91198	-3.27347	-3.15549	-3.57711	-3.56312
1379595_at	Tmem60	transmembrane protein 60	1	1	1	1	1	1	1	1	1	1	1	-5.17475	1	1	-4.21546	-3.42243	-3.70127	-4.2061	-4.30468
1377096_at	Mtfmt	mitochondrial methionyl-tRNA formyltransferase	1	1	1	1	1	1	1	1	1	-5.78099	1	-5.56864	1	1	-3.43357	-3.74522	-3.36991	-2.546	-2.64119
1372602_at	Stbd1	starch binding domain 1	1	1	-1.67915	1	1	1	1	1	1	-3.49667	-3.04243	-3.31418	-1.72437	-1.52505	-4.65246	-4.60391	-2.52752	-2.44902	-2.74549
1377141_at	LOC498685		-1.35157	-1.56154	-1.34244	-1.36721	-1.33067	1	1	1	1	-3.66291	-2.85986	-5.57887	-1.83134	-1.67476	-2.71982	-2.79308	-2.34859	-2.79313	-3.58373
1370327_at	Commd5	COMM domain containing 5	1	1	1	1	1	1	1	1	1	-3.54206	-2.50369	-3.21033	-2.7232	1	-2.80851	-3.31179	-2.68895	-5.41472	-3.48954
1367812_at	Sptbn2	spectrin beta 3	-1.41948	-1.59514	1	1	1	1	1	1	-1.46096	-3.0912	-2.35799	-2.57038	-2.23117	-1.71314	-3.30855	-2.3432	-2.18071	-2.76386	-3.20601
1370433_at	Hsd3b7	hydroxy-delta-5-steroid dehydrogenase, 3 beta- and steroid delta-isomerase 7	-1.51727	1	1	-1.69908	1	1.43951	1	1	1	-3.63325	-7.27741	-7.45861	-3.2059	1	-2.50609	-2.28654	-2.35652	-3.80864	-3.83393
1373956_at	Fundc1	FUN14 domain containing 1	1	1	1	1	1	1	1	1	1	-2.82711	1	-7.78861	1	1	-4.9381	1	1	1	-4.83914
1381774_at	Lrp16		1	1	1	1	1	1	1	1	1	-6.30448	1	-7.97529	-3.03154	1	1	-4.80364	1	-4.64792	-6.15547
1389491_at	Sfxn5		-1.83942	-2.95312	-2.84237	-1.96935	1	1	-1.90996	1	1	-5.23023	-7.1135	-4.71198	-3.13641	-3.00143	-2.99646	-3.4754	-2.90706	-3.32737	-2.66978
1372429_at	Acd	adrenocortical dysplasia	-3.5993	1	1	1	1	1	1	1	1	-6.06104	-6.4233	-4.95202	1	1	-3.81285	1	-2.59555	-3.04116	1
1391270_at	Cnnm3	cyclin M3	1	1	-6.21178	1	1	1	1	1	1	-21.7765	-19.1495	-10.3813	1	1	1	-4.56837	1	1	-3.6927
1377624_at	Gtpbp10	GTP-binding protein 10 (putative)	1	-2.81303	1	1	1	1	1	1	1	-3.08914	1	-10.2241	1	1	-2.78295	-2.59626	1	-3.12724	1
1383050_at	Prr6	proline-rich polypeptide 6	-1.76869	-1.96075	1	1	1	1	1	1	1	-5.8088	-5.88592	-5.28324	-1.75552	-1.9712	-1.8693	-2.09632	-2.13081	-2.15953	-2.98525
1370656_a_at	Homer1	homer homolog 1 (Drosophila)	1	1	1	1	1	1	1	1	1	-13.0387	1	-5.50905	1	1	-3.28989	1	-2.44814	-2.67567	1
1368452_at	Abcc6	ATP-binding cassette, sub-family C (CFTR/MRP), member 6	-1.44558	-1.29833	-1.42662	1	1	-1.3354	-1.56404	1	1	-5.43668	-5.711	-6.69149	-2.46685	-1.63506	-3.85993	-3.24414	-3.67704	-2.48046	-3.27549
1386754_at	Trim14	tripartite motif protein 14	-1.56158	-1.504	-1.52866	1	1	1	1	1	1	-9.31982	-4.18805	-7.99436	-2.67086	-1.99135	-3.42343	-2.52157	-2.96681	-2.01139	-3.9899
1381858_at	Trim14	tripartite motif protein 14	1	1	-1.43172	1	1	1	1	1	1	-5.85894	-3.41832	-7.06114	-3.22329	-1.62607	-2.41016	-1.94627	-2.53318	-1.98214	-3.60161
1383647_a_at	Crb3	crumbs homolog 3 (Drosophila)	1	1	-2.45382	1	1	1	1	1	1	-4.46625	1	-14.4283	-3.59332	1	1	-5.21645	-6.16736	-4.6229	1
1373304_at	Coasy	Coenzyme A synthase	1	-1.65744	-1.82434	1	1	1	1	1	1	-4.57604	-6.93359	-6.10683	-2.61446	-2.19059	-2.92819	-3.36286	-3.34097	-2.80853	-2.88803
1374303_at	Alkbh2	alkB, alkylation repair homolog 2 (E. coli)	-2.21067	-1.97031	1	1	1	1	1	1	1	-3.6128	-7.93868	-4.33927	-2.50748	-2.37251	-4.57928	-4.12639	-2.81121	-3.45092	-4.1922
1374512_at	LOC684314	similar to CG9886-like	-1.97252	-1.70597	-1.91654	1	-1.28609	-1.37477	-1.41446	1	1	-3.46811	-3.42443	-6.04968	-2.59007	-1.62629	-3.29319	-2.60235	-3.13188	-2.86611	-2.95625
1388655_at	Ssna1	Sjogren's syndrome nuclear autoantigen 1	1	1	1	1	1	1	1	1	1	-3.71181	-6.20997	-3.84407	-2.29444	1	-2.76099	-3.0101	-3.61593	-3.26631	-2.09522
1383327_at	Pdcd4	programmed cell death 4	-1.57438	-1.88377	-1.88706	-1.7128	-1.48861	-2.04977	1	1	1	-1.63347	-2.06507	-1.83132	-1.6031	-1.97581	-2.7817	-3.55054	-4.14574	-3.22845	-3.41819
1383328_x_at	Pdcd4	programmed cell death 4	-1.46699	-1.96847	-1.79482	-1.39632	-1.48014	-2.19713	1	1	1	-1.56369	-1.60121	-2.2683	-1.61278	-1.89533	-2.96512	-4.07771	-3.10597	-4.10345	-3.06531
1383326_a_at	Pdcd4	programmed cell death 4	-1.55861	-2.71807	-1.92044	-1.71546	-1.62472	-2.08778	1	1	1	-1.96456	-2.23221	-2.71785	-1.91441	-2.14839	-2.61758	-4.34508	-3.87307	-3.61445	-4.24824
1391507_at	Znf467	zinc finger protein 467	1	1	1	1	1	1	1	1	1	1	1	-2.95588	-3.60371	-3.55783	-2.91428	-3.33427	-2.90465	-2.95773	-3.62811
1386106_at	Zcchc24	similar to hypothetical protein FLJ90798	1	-1.9843	1	1	1	1	1	1	1	-2.89141	1	-6.12919	-1.99186	-2.75409	-2.19866	-2.28664	-2.20322	-2.1183	-3.07382
1377072_at	RGD1563532_predicted		1	1	1	1	1	1	1	1	1	1	1	1	1	1	-3.17581	1	1	1	-3.61316
1376792_at	Fam176a	transmembrane protein 166	1	-1.89572	-1.78771	-1.78117	-2.1546	-1.96766	1	1	1	-4.49951	-4.23549	-4.28479	-3.73456	-2.70202	-2.23317	-2.73703	1	-2.19684	-2.23733
1386653_at	Prickle2	prickle-like 2 (Drosophila)	1	1	1	1	1	1	1	1	1	1	1	1	1	1	1	1	1	1	-7.42873
1384119_at	Mlh3	mutL homolog 3 (E. coli)	1	1	1	1	1	1	1	1	1	1	1	1	1	1	1	1	1	-5.9658	-7.71669
1378902_at	Tyw1	tRNA-yW synthesizing protein 1 homolog (S. cerevisiae)	1	1	1	1	1	1	1	1	1	-2.17787	-4.00573	-3.23569	-2.11326	1	-2.87938	-3.4882	-3.03166	-3.85581	-4.15756
1389644_at	Wdr67	WD repeat domain 67	1	-2.11908	1	1	1	1	1	1	1	-2.90537	-5.60704	-2.82329	1	-2.23812	-3.06384	-3.23833	-2.91153	-2.23111	-6.26616
1378874_at	Cdk2	cyclin dependent kinase 2	1	1	1	1	1	1	1	1	1	1	1	1	1	1	-2.98789	-3.14979	-3.07894	-3.76458	-2.71231
1380515_at	Bbs7	Bardet-Biedl syndrome 7	1	1	1	1	1	1	1	1	1	1	1	1	1	1	-7.02666	1	1	-5.44237	1
1378571_at	Zfp385b	zinc finger protein 385B	1	1	1	1	1	1	1	1	1	1	1	1	1	1	1	1	1	-4.6065	1
1383486_at	1383486_at		1	-4.58462	1	-4.1015	1	-5.08313	1	1	1	-8.25054	-5.80865	-22.6138	-3.58982	-3.92007	-4.30213	-5.26856	-2.76906	1	-3.57423
1374307_at	LOC287005		1	-2.6009	1	1	1	1	1	1	1	-2.20622	1	-4.05733	1	-2.83501	-4.80029	-7.03094	-2.53535	-3.83257	-3.28306
1373358_at	Usp8	ubiquitin specific peptidase 8	1	1	1	1	1	1	1	1	1	1	1	-5.5523	1	1	1	-6.02102	1	1	1
1377176_at	Cyhr1	cysteine and histidine rich 1	1	1	1	1	1	1	1	1	1	1	1	-6.5319	1	1	1	1	1	1	1
1378656_at	Bbs5	Bardet-Biedl syndrome 5 (human)	1	1	1	1	1	1	1	1	1	-4.04127	1	-8.68605	1	1	-3.96082	1	-4.56557	-3.78999	1
1376772_at	RGD1308299		1	1	1	1	1	1	1	1	1	1	1	-7.81304	1	1	1	1	1	1	1
1379833_at	Rorc	leucine rich repeat and Ig domain containing 4 /// RAR-related orphan receptor C	-3.94929	-4.23582	1	-3.22983	1	-7.68982	1	1	1	-8.81453	-6.49331	-13.8249	1	-3.87872	1	-3.94449	1	1	1
1381049_at	Zfyve9	zinc finger, FYVE domain containing 9	1	1	1	1	1	1	1	1	1	1	1	1	1	1	-10.7871	1	1	-9.17046	1
1389585_at	Pvrl1		1	1	1	1	1	1	1	1	1	-3.04457	1	1	1	1	-5.17318	-2.77995	-2.95334	1	1
1372029_at	M6prbp1	mannose-6-phosphate receptor binding protein 1	-2.33335	-2.54845	-2.05312	1	-1.62697	1	1	1	1	-3.57144	-4.78288	-4.03644	1	-2.20013	-4.34751	-3.90164	-3.3807	-5.31597	-3.06551
1398295_at	Slc29a1	solute carrier family 29 (nucleoside transporters), member 1	-1.97665	-3.30512	-2.70236	1	1	1	1	1	1	-2.77121	1	-6.17903	-1.8997	1	-3.03421	-3.73598	-2.87506	-2.18331	-2.59099
1397370_at	Hrbl_predicted		1	-2.50688	1	1	1	1	-2.50441	-3.27737	-3.34419	-5.211	-3.65115	-3.54769	1	1	-6.16549	-7.56801	-2.71074	-3.91992	-3.74526
1378169_at	Acot3	acyl-CoA thioesterase 3 /// acyl-CoA thioesterase 4	1	1	1	1	1	1	1	-2.54812	-2.91884	-3.15063	-7.09598	-5.14225	-4.12988	1	-5.34885	-10.9166	-6.22516	-2.80289	-2.74691
1370943_at	Sult1c2a	sulfotransferase family, cytosolic, 1C, member 2a	1	1	1	1	1	1	-17.1847	-8.9927	-9.15854	-4.81955	-5.41444	-2.89967	-11.7328	-5.08549	-3.71933	-2.87948	1	-4.11316	-5.57266
1393064_at	RGD1564108_predicted		1	1	1	1	1	1	-7.79774	-3.24572	-3.14039	-4.58099	-6.82588	-3.93301	-2.60631	-3.03043	-5.63952	-2.75023	-3.81859	1	1
1372966_at	Mfsd2	major facilitator superfamily domain containing 2	-1.64586	1	1	1	1	1	-7.44502	-5.07648	-8.53829	-3.12536	-2.21792	1	-3.11966	-2.28191	-4.18406	-3.67151	-5.73533	-3.55481	-4.28936
1368536_at	Enpp2	ectonucleotide pyrophosphatase/phosphodiesterase 2	-1.37395	-1.25526	-1.40894	1.22243	1	1	-5.01595	-6.37098	-3.78687	-3.76613	-4.18611	-2.7784	-3.06773	-2.85212	-2.03431	-2.57401	-2.12962	-2.26134	-2.58121
1372889_at	Slco2a1		-1.41875	-1.27395	1	1	1	-1.39992	-3.2063	-2.29721	-2.75642	-5.5561	-3.9727	-5.11799	-6.16759	-3.70682	-4.32796	-4.92687	-2.47129	-2.31387	-3.08128
1391397_at	LOC684055	hypothetical protein LOC684055	-1.63441	1	-1.71803	1	1	1	-2.8253	-4.07053	-2.07082	-4.94894	-7.65663	-3.59754	-4.73079	-3.17484	-3.75397	-2.4999	-2.95173	-3.53651	-2.4451
1368675_at	Chn2	chimerin (chimaerin) 2	1	1	1	1	1	1	-5.04164	-4.19227	-3.04532	-9.95379	-4.57982	-7.97953	-11.6886	-10.8878	-3.02205	-5.02078	-3.04598	-5.39145	-4.68712
1384834_at	Cobl	cordon-bleu	1	1	-2.54537	1	1	1	-2.60055	-2.82712	1	-9.05294	-9.56245	-5.70918	-5.89149	-6.02236	-4.35104	-3.28696	-2.73743	-5.84859	-4.00488
1375278_at	Trim2	tripartite motif protein 2	1	1	1	1	1	1	-2.45374	-2.87525	1	-11.3054	-4.32062	-5.25107	-5.06672	-2.97086	-3.68457	-3.31158	-4.07662	-3.5023	-3.73737
1385098_at	1385098_at		1	1	1	1	1	1	-2.79384	-2.97746	-2.0669	-4.5645	1	-3.62876	-2.66322	-3.09334	-7.40733	-4.17265	-3.43303	-4.7653	-7.74572
1382108_at	Mafb		1	-1.64335	-1.32899	1	1.63503	1	-4.68164	-2.65739	-3.2941	-9.19653	-3.68779	-5.11257	-2.97854	-3.12965	-3.39273	-3.36095	-4.64544	-2.9743	-5.06927
1394290_at	1394290_at		1	1	1	1	1	1	-2.84651	-2.43041	-2.18935	-4.20765	-4.72146	-4.23235	-3.21115	-3.15077	-3.54407	-2.85782	-3.40412	-3.01536	-3.48848
1369678_a_at	Nfia	nuclear factor I/A	1	1	1	1	1	1	-3.20183	-3.03435	-2.33929	-5.64701	-2.82988	-5.24451	-2.69992	-3.37962	-2.54556	-3.19847	-2.86747	-3.05615	-3.75498
1390240_at	1390240_at		1	1	1	1	1	1	-3.82395	-2.23203	-2.22115	-3.9563	-4.07863	-4.38232	-6.20742	-4.58595	-3.50906	-4.03238	-6.53068	-4.87453	-7.15309
1378242_at	Trove2_predicted		1	1	1	1	1	1	-3.80008	-2.66178	-3.90529	-5.83392	1	1	-7.21285	-5.68445	1	1	1	1	1
1371976_at	RGD1311273	similar to RIKEN cDNA 9530058B02	1	1	1	1.70184	1	1	-13.6823	-3.30928	-8.08773	-24.4018	-16.8055	-4.81503	1	-3.68246	-5.79115	-5.32257	-3.99124	-11.8189	1
1388644_at	Mgll	Monoglyceride lipase	1	1	1	1	1	1	-4.22577	-3.26044	-3.15764	-3.23307	1	-2.34527	-3.50268	-6.64032	-2.7217	-2.81638	-2.82736	-6.08604	-2.77985
1370831_at	Mgll	monoglyceride lipase	1	1	1	1	1	1	-5.39408	-6.46627	-5.83198	-8.75809	1	-5.95118	-4.34313	-6.35787	-2.12318	-2.72175	-3.44488	-4.12889	-1.97397
1394577_at	1394577_at		1	1	1	1	1	1	-7.60469	-5.50069	-7.06356	-10.7163	1	-4.90525	1	-10.4968	1	-3.15497	1	-3.94625	1
1369468_at	Fzd4	frizzled homolog 4 (Drosophila)	1	1	1	1	1	1	-4.04201	-3.19552	-3.84235	-4.88388	1	-5.67195	1	-3.87955	-3.19465	-2.99568	1	1	-3.31761
1387121_a_at	Ndrg2	N-myc downstream regulated gene 2	-1.4303	-1.42346	-1.63968	1	1	1	-4.8981	-3.09677	-4.8823	-4.37476	-6.23308	-5.41396	1	-2.51723	-2.13786	-3.8012	-4.18105	-2.59087	-2.71943
1391417_at	Bhmt2	betaine-homocysteine methyltransferase 2	-1.50538	-1.57582	-1.59909	1	1.14559	1	-3.31992	-2.2344	-2.61304	-4.44387	-8.4907	-6.04857	-3.31265	-2.14898	-2.52411	-2.67652	-3.30749	-2.95651	-2.69084
1389256_at	1389256_at		-1.41163	-1.95757	-1.76388	1	1	1	-2.97108	-2.875	-2.30149	-5.1592	-9.89641	-7.64598	-1.85482	-2.60553	-2.09666	-2.858	-3.3458	-2.48645	-2.5702
1371730_at	Lonp2	lon peptidase 2, peroxisomal	-1.23368	1	-1.40871	1	1	1	-2.6848	-2.36064	-1.70031	-4.84938	-5.02179	-4.2558	-3.19028	-2.12998	-2.36111	-3.17646	-2.89306	-3.87985	-3.74438
1376057_at	Pde8a	Phosphodiesterase 8A	1	1	1	1	1	1	1	1	1	-7.30458	-5.52796	-6.46717	1	1	-3.07501	-3.7819	-2.78745	-3.39199	-3.125
1369854_a_at	Ceacam1	CEA-related cell adhesion molecule 1	1	1	-1.96332	1	1	1	-2.64648	-5.09035	-3.43512	-3.09723	1	-3.88086	-4.29909	1	-3.16791	-5.36392	-2.40284	-2.83558	-4.03495
1384145_at	RGD1310495	similar to KIAA1919 protein	1	1	1	1	1	1	-2.38508	-2.9389	-2.42839	-3.00418	-4.5877	-4.81725	-4.65044	-2.92494	-3.70929	-2.78432	-2.45333	-2.35163	-3.90442
1381719_at	Cyb5		1	1	1	1	1	1	-3.08303	-2.15217	-2.09612	-3.93681	1	-4.05369	-3.08478	-2.50885	-3.35648	-3.14297	-2.8594	-3.04572	-5.14631
1387058_at	Pctp	phosphatidylcholine transfer protein	-1.30257	1	1	1.26675	1	1	-1.8218	-2.14672	-1.86179	-4.73555	-7.31707	-4.55498	-3.39735	-3.08838	-2.80936	-2.37026	-3.7999	-3.33974	-2.23674
1370688_at	Gclc	glutamate-cysteine ligase, catalytic subunit	-1.91024	-2.04399	1	1	1	1	-1.96295	-2.1805	-2.06805	-3.34958	-3.8662	-3.98063	-4.09932	-3.56914	-2.20999	-2.1811	-2.69872	-3.53398	-3.35043
1370465_at	Abcb1a	ATP-binding cassette, sub-family B (MDR/TAP), member 1A	-2.27104	1	1	1	1	1	-2.63023	-2.71445	-3.45387	-3.75742	1	-3.95337	-6.09471	-4.77875	-4.8382	-2.8149	1	-2.74855	-3.35345
1371431_at	Pex5	peroxisome biogenesis factor 5	1	1	1	1	1	1	-1.86801	-1.62755	-1.69245	-3.53895	-6.54953	-4.26856	1	-2.30257	-2.91308	-2.77153	-2.7642	-2.40408	-2.23885
1376765_at	Mro	maestro	1	1	-1.33247	1	1	1	-2.0656	-1.96982	-2.05973	-3.93632	-3.99168	-3.13204	-2.61623	-2.19664	-3.26435	-2.15907	-2.67445	-1.64265	-2.08019
1368717_at	Faah	fatty acid amide hydrolase	1	1	1	1	1	1	-3.0892	-2.0483	-2.2955	-3.61757	-4.04034	-3.41075	-3.04371	-1.98116	-2.75846	-2.69841	-2.38827	-1.884	-2.81528
1368336_at	Fdx1	ferredoxin 1	-1.29075	1	1	1	-1.19088	1	-2.42287	-1.56451	-1.76531	-3.2879	-3.03129	-2.98957	-2.63007	-2.0811	-1.86601	-1.33748	-1.63296	-3.04991	-2.22677
1371541_at	Mylk	myosin, light polypeptide kinase	1	1	-1.57934	1	1	1	-2.49208	-2.33025	1	-3.09655	-2.89665	-3.86589	-2.67153	-1.68958	-2.7392	-2.16034	-2.5711	-2.07732	-2.31731
1387127_at	Atrn	attractin	1	1	1	1	1	1	-2.69845	-1.71944	-1.79634	-5.08049	-2.61757	-3.96696	-3.49835	1	-2.6564	-2.37534	-2.58161	-2.19319	-2.66154
1369636_at	Sord	sorbitol dehydrogenase	-1.34426	-1.28491	-1.37837	-1.19843	1	1	-2.11759	-2.40451	-1.91946	-2.34929	-3.95156	-3.33759	-3.67976	-2.4385	-2.11796	-2.95272	-2.73896	-2.01347	-2.44898
1387528_at	Mbl2	mannose binding lectin 2 (protein C)	-1.39438	1	-1.31601	1	1	1	-2.08792	-2.30712	-2.2193	-2.46348	-2.97904	-3.67158	-4.55695	-1.69035	-2.25996	-2.69843	-2.01212	-2.17522	-3.13439
1372734_at	Smagp	small cell adhesion glycoprotein	-1.29794	-1.32626	-1.36646	1	-1.30097	-1.32581	-2.40635	-1.90983	-2.32678	-3.12186	-6.89447	-2.7444	-3.07147	-2.90695	-2.77726	-3.19239	-2.9176	-2.53493	-2.38613
1385072_at	Galm	galactose mutarotase	1	-1.55556	1	1	1	1	-2.52786	-2.41193	-1.8908	-2.42767	-2.46762	1	-3.98204	-2.4307	-3.29372	-1.87652	-2.82205	-1.99379	-2.69954
1367843_at	Akr7a2	aldo-keto reductase family 7, member A2 (aflatoxin aldehyde reductase)	-1.44142	1	1	1	1	1	-2.6294	-2.42927	-2.28721	-3.68308	-5.50738	-3.62252	-3.07315	-2.42885	-2.43842	-2.62521	-2.24054	-2.36111	-2.30891
1372323_at	Sardh	sarcosine dehydrogenase	1	1	-1.67509	1.40829	1	1	-2.04819	1	-2.32225	-2.25543	-3.03213	-2.82039	-2.17476	-1.42561	-3.00477	-2.25653	-4.23567	-1.76763	-3.69979
1382975_at	Ceacam1	CEA-related cell adhesion molecule 1	-1.29727	1	-1.50395	1	1	1	-2.19974	-1.85448	-1.91589	-2.37399	-2.27142	-2.48839	-2.63858	-1.98603	-1.91505	-2.4804	-2.08505	-1.80907	-3.53604
1383830_a_at	Osbpl1a	oxysterol binding protein-like 1A	1	1	1	1	1	1	-1.92718	-1.87104	1	-3.1718	1	-3.07575	1	-1.9911	-3.24757	-2.72533	-2.26187	-2.0456	-2.06419
1379240_at	1379240_at		-1.45361	-1.31004	-1.2604	-1.308	1	1	-1.87003	-1.2965	-1.77961	-2.59266	-2.89794	-3.55065	-2.71637	-1.67325	-2.45492	-2.42825	-2.14125	-1.84168	-2.977
1383833_at	Fam55b	hypothetical protein LOC500991	-1.27787	-1.58843	-1.37124	1	1.26085	1	-2.26557	-1.73011	-1.76259	-2.65068	-2.58807	-3.02663	-2.20621	-1.51351	-2.24632	-2.17413	-2.21657	-1.67634	-2.72794
1369455_at	Abcg5	ATP-binding cassette, sub-family G (WHITE), member 5	-2.17081	1	-1.62935	1	1	1	-1.71388	-2.72589	-2.87466	-3.26007	-3.09247	-4.34651	-3.45286	-2.06982	-3.22714	-2.62817	-1.90204	-2.14145	-2.38722
1398335_at	Ttyh3	tweety homolog 3 (Drosophila)	1	1	1	1	1	1	1	1	1	1	1	1	1	1	-5.32383	1	1	1	1
1387821_at	Rab3ip	RAB3A interacting protein	1	1	1	1	1	1	-2.03112	1	-1.89354	-6.1249	-4.81578	-5.67808	-2.13224	1	-3.90532	-2.86964	-2.15613	1	-3.83464
1389678_at	1389678_at		-2.15721	-2.05852	-2.24715	1	1	1	-2.68243	1	-2.36908	-2.25266	1	-2.89986	-2.01282	-2.13056	-3.22622	-2.87211	-5.21592	-3.80233	-2.34379
1368878_at	Idi1	isopentenyl-diphosphate delta isomerase	-2.19823	1	-2.6474	-1.67155	2.0912	1.89626	1	-1.65237	-1.73048	-1.74332	1	-3.85299	-2.17969	1	-2.5969	-4.66722	-3.39361	-1.34185	-3.35411
1383111_at	Acmsd		1	1	1	1	2.2846	1	1	1	1	1	1	-3.11832	1	1	-2.85664	-3.69485	-3.00793	-1.73614	-2.61054
1368147_at	Dusp1	dual specificity phosphatase 1	1	1	1	1	1	-2.67714	-4.91223	-3.71241	1	-4.78092	1	1	1	-2.65612	-2.28638	-3.03458	-3.20992	-2.21524	-2.18687
1372884_at	Large	like-glycosyltransferase	1	1	1	1	1	1	-3.31874	1	-2.41273	-4.48756	1	-3.69462	1	-4.14269	-2.8586	-3.27387	-3.2352	1	-2.2657
1385798_at	1385798_at		1	1	1	1	1	1	-3.91474	1	1	-2.9656	1	1	1	1	1	-3.29408	1	1	1
1385205_at	1385205_at		1	1	-4.90084	1	1	1	-3.19064	-2.72632	1	-2.58649	-5.85755	-3.49728	1	-2.52385	1	1	1	1	1
1383063_a_at	1383063_a_at		1	-1.62851	-1.46208	1	1	-1.3706	-2.13494	-1.66635	-1.84918	-2.78468	-3.7551	-2.82551	-1.84299	-2.16577	-1.86266	-1.63478	-2.03909	-2.16775	-1.74077
1388946_at	RGD1311910	similar to hypothetical p38 protein	1	1	1	1	1	1	-2.78739	-2.09914	-2.07878	-4.28287	-3.9936	-4.0412	1	-2.94656	-1.918	1	-1.9408	-2.23984	-2.41975
1379716_at	Cd163		1	1	1	1	1	1	-2.49149	-1.94289	1	-3.52419	1	-3.16255	1	-2.53135	-2.50821	-2.45231	-1.8464	-1.92181	-1.71737
1376194_at	1376194_at		1	1	1	1	1	-1.34574	-2.6842	-2.2571	-2.14372	-3.20351	-4.85455	-5.73684	-1.37338	-2.4548	1	1	-1.69807	1	-1.55407
1383194_a_at	1383194_a_at		1	1	1	1	1	1	-2.88802	1	-2.04074	-2.63019	1	-4.4655	1	-2.56359	1	1	-2.46799	-2.56949	1
1388583_at	Cxcl12	chemokine (C-X-C motif) ligand 12	-1.41008	-2.11305	-1.43541	-1.53414	-1.64546	-1.31462	-1.84173	-1.28646	-1.58463	-2.96609	-3.06153	-2.41069	-3.25088	-2.15241	-1.75035	-1.53647	-1.90334	1	-1.9783
1387816_at	Igfals	insulin-like growth factor binding protein, acid labile subunit	1	-1.45713	1	1	-1.78324	1	-2.76923	-1.90177	-3.01834	-3.30842	-2.40423	-2.68955	-3.29385	-2.50667	-1.99919	-2.47395	-1.58241	1	-2.41591
1370599_a_at	Ptprs	protein tyrosine phosphatase, receptor type, D	1	-2.58566	1	1	1	-1.79177	-2.13656	-1.76168	-1.66831	-2.95391	1	-2.45666	-2.20419	-2.63729	-1.84654	-2.17103	1	1	-2.9365
1383835_at	1383835_at		1	1	1	1	1	1	-2.60749	1	1	-3.77868	1	-3.10018	-2.15812	-2.92269	-2.5049	1	1	1	-2.26206
1381975_at	RGD1311350_predicted		1	1	1	1	1	1	-4.12311	1	-2.79793	1	1	-2.91896	1	-2.61392	1	-2.68587	1	1	1
1380389_at	Ptger3		1	1	-1.42428	1	-1.75668	-1.48092	-2.72123	-2.54108	-2.56102	-2.46187	-2.82463	-3.17202	-3.26734	-3.22379	-1.6867	-2.7557	-2.44549	-1.46407	-2.24162
1379580_at	Chd6	chromodomain helicase DNA binding protein 6	1	1	1	1	1	1	-3.31944	1	1	1	1	1	1	1	1	-2.86262	1	-2.74672	-5.35266
1375067_at	1375067_at		1	1	1	1	1	1	1	1	1	1	1	-5.95751	1	-7.09565	1	-4.1421	1	1	1
1378124_at	Ppm1b	protein phosphatase 1B, magnesium dependent, beta isoform	1	1	1	1	1	-2.70192	1	-2.71367	1	-3.17485	1	-10.1891	1	-3.07535	1	1	1	1	1
1377069_at	1377069_at		1	1	-1.77936	-1.76503	1	1	-2.54815	1	1	-2.23761	-3.28683	-3.4637	-3.54437	-3.01508	1	-2.27192	-1.88594	-2.20213	-2.37144
1369777_a_at	Shank2	SH3/ankyrin domain gene 2	1	1	1	1	1	1	-2.02612	-1.79132	-2.29933	-2.76467	-4.31298	-2.79168	-2.12592	-3.04832	1	-2.41647	1	-2.27361	1
1371127_at	Bmp1	bone morphogenetic protein 1	1	1	1	1	1	1	-3.45882	1	-2.51266	-3.65589	1	-4.4247	-4.07185	-3.25917	-6.70275	-3.80237	1	-4.12206	1
1396036_at	Ralgps2	Ral GEF with PH domain and SH3 binding motif 2	1	1	1	1	-1.88752	1	-2.38168	-2.49551	-2.06076	-2.70252	-3.40288	-3.44715	-5.29305	-2.68029	-2.45392	-2.91799	-2.30852	-4.46792	-2.87879
1370436_at	Acsm2	acyl-CoA synthetase medium-chain family member 2	1	1	-1.86677	1	-2.53798	1	-2.47887	-1.96339	-1.62265	-4.1496	-1.67039	-7.13213	-3.20668	-2.21907	-4.4512	1	1	1	-2.43499
1375209_at	Osbpl11	oxysterol binding protein-like 11	1	1	1	1	1	1	-2.18428	1	1	-3.42484	-2.8238	-4.72663	-2.09843	-2.55345	-2.54469	-2.91589	-2.29218	-2.45145	-2.88462
1389114_at	Thnsl2	threonine synthase-like 2 (bacterial)	1	1	1	1	1	1	-2.35668	-2.02457	-2.77659	-4.13348	1	-4.71993	-3.08526	-3.05451	-2.67108	-2.12329	1	1	-2.74409
1389265_at	Gbe1	glucan (1,4-alpha-), branching enzyme 1	-1.27507	-1.49698	-1.38026	-1.24411	-1.23364	1	-2.58379	-2.87281	-2.34629	-2.4598	-2.67809	-2.13067	-2.06486	-1.818	-1.5256	-2.11992	-2.0973	-1.86542	-2.21832
1390795_at	Ttpa	tocopherol (alpha) transfer protein	1	-1.28143	-1.27012	1	1	1	-2.60036	-2.57192	-1.92751	-2.04487	-2.30841	-2.13548	-2.77739	-1.56565	-1.79453	-2.44868	-2.04608	-1.84025	-2.32589
1383796_at	LOC690745	MOCO sulphurase C-terminal domain containing-like	1	1	1	1	1	1	-2.67092	-1.78196	-1.74096	-2.28271	-1.5963	-1.79452	-3.51315	-1.98732	-3.07118	-2.73429	-2.1597	-2.1771	-2.13071
1387867_at	Aldh9a1	aldehyde dehydrogenase 9 family, member A1	-1.23929	1	-1.26074	1	1	1	-2.47794	-1.94056	-1.78684	-2.37092	-2.44563	-2.42202	-2.70132	-2.18064	-2.21478	-2.2792	-1.9942	-2.22851	-2.02009
1369635_at	Sord	sorbitol dehydrogenase	-1.29567	-1.30614	-1.3314	-1.30755	1	1	-2.14547	-2.47576	-1.8703	-2.13561	-3.39054	-2.66931	-4.56133	-2.21217	-2.06241	-2.47575	-2.29486	-1.99113	-2.10841
1370724_a_at	Nfia	nuclear factor I/A	1	1	1	1	1	1	-2.57152	-2.31955	-2.06457	-2.85329	-2.62525	-2.88918	-2.12364	-2.2971	-2.19001	-2.22904	-2.11401	-2.04872	-2.40526
1369840_at	UST4r	integral membrane transport protein UST4r	1	-1.44432	1	-1.7011	1	-1.22554	-3.16959	-1.77155	-2.42989	-2.06674	-1.88586	-2.60103	-3.57117	-2.18545	-2.29086	-1.97039	-1.89339	-2.25365	-2.22743
1398514_at	Hgd	homogentisate 1, 2-dioxygenase	1	1	-1.32256	1	1.28639	-1.30054	-1.94843	-1.83793	-2.25677	-1.71867	-2.8003	-2.72548	-2.56859	-1.89822	-1.30621	-2.08139	-2.17504	-2.02807	-2.02401
1387973_at	Cyp4f4	cytochrome P450, family 4, subfamily f, polypeptide 4	-1.28396	-1.38442	-1.28201	1.19576	1	1	-2.77312	-2.09822	-1.75011	-2.46683	-3.12225	-2.05971	-2.88412	-1.88327	-1.97553	-2.38066	-2.20751	-2.45471	-2.56301
1368095_at	Ak3	adenylate kinase 3	1	1	1	1	1	1	-3.09009	1	1	-3.07756	-4.11218	1	1	1	-2.19922	-2.38859	-2.17254	-2.43297	-2.47194
1384877_at	Aqp11	aquaporin 11	1	1	1	1	1	1	-2.15083	1	-2.16606	-2.5361	-4.89219	-3.04012	-4.75316	-2.22973	-2.36555	-2.61426	1	-2.54287	-2.73762
1385561_at	Pex1	peroxisome biogenesis factor 1	1	1	1	1	1	1	1	1	1	1	1	-4.63385	-4.52531	1	-3.34592	1	-3.72384	1	1
1368924_at	Ghr	growth hormone receptor	1	1	-1.51537	1	1	-1.28802	-2.32656	-2.72961	-2.55457	-2.66052	-1.74285	-2.5622	-2.45252	-2.31808	-1.90728	-2.5086	-2.99249	-2.09605	-4.15582
1372790_at	Mdh1	Malate dehydrogenase 1, NAD (soluble)	1	1	-2.30983	1	1	1	-2.07231	-1.76012	-2.58365	-2.91478	-1.84404	-2.32994	-1.79588	-2.40302	-2.37541	-2.40626	-1.9769	-2.70227	-2.45739
1384638_at	Gcdh_predicted		1	1	-1.34288	1	1	1	-3.13398	-1.93019	-2.0971	-2.20703	-3.62216	-2.28243	-3.33323	-1.82551	-1.89679	-1.86467	-2.64057	-2.34026	-2.46058
1380085_at	Ercc8_predicted		1	1	-1.63794	1	1	1	-2.04378	-1.79226	-2.07304	-2.43216	-2.19323	-2.62651	-3.91721	-2.33213	1	-2.59168	-2.77817	1	-2.52999
1377824_a_at	Igf2bp3	insulin-like growth factor 2 mRNA binding protein 3	1	1	-2.77319	1	1	1	-2.14481	-2.46734	-2.29438	-2.61011	-2.75895	-2.44667	-2.38813	-2.54913	1	1	1	-2.04509	-2.15313
1387958_at	Akr1c18	aldo-keto reductase family 1, member C18	1	1	1	1	1	1	-3.97866	-2.20034	-2.82078	-2.6138	1	-2.7131	-2.94891	-2.73898	1	-2.05582	-2.67154	1	-3.20784
1367729_at	Oat	ornithine aminotransferase	1	1	-2.06838	-1.45313	1.88832	-1.40318	-3.48184	-3.03369	-3.77009	-2.09953	-1.89701	-3.35463	-2.11818	-2.13267	-1.64882	-2.32806	-2.22045	-1.33044	-2.28218
1376825_at	RGD1310875_predicted		1	1	1	1	1	1	-3.45942	-2.26824	1	-3.81691	1	-4.9675	-3.05833	-2.83274	-2.37351	-2.05688	-2.3	1	-2.43186
1375856_at	1375856_at		1	1	-1.87277	1	1	1	-4.58296	-2.0308	-2.68596	-2.12219	-3.36221	-3.75005	-3.37106	-2.30385	-1.58565	-2.07798	-1.98615	-1.51576	-2.3485
1369799_at	Abat	4-aminobutyrate aminotransferase	-1.32641	-1.42994	-1.86333	1	1	1	-4.38228	-2.12197	-2.74196	-2.80073	-3.01708	-3.57977	-3.09709	-1.88718	-1.66141	-2.07793	-3.195	-1.76705	-3.64278
1393061_at	Ttc36	tetratricopeptide repeat domain 36	-1.98584	-1.6284	-2.60321	1	1	1	-3.03828	-1.86487	-2.46137	-2.82175	-3.93779	-3.74296	-3.59845	-2.18253	-1.66293	-3.00201	-1.87905	-1.56303	-1.67612
1371161_at	Ppp1r3b	protein phosphatase 1, regulatory (inhibitor) subunit 3B	1	1	-7.61601	1	1	1	1	1	1	-3.60667	1	-4.22063	-3.18323	1	1	-7.20599	1	-3.56867	1
1368178_at	Pdzk1	PDZ domain containing 1	1	1	1	1	-1.60804	1	-3.1957	-2.48736	-2.36183	-5.16149	-3.62601	-3.59503	-5.08522	-2.82489	-3.09992	-2.21012	-1.80795	-2.23515	-1.79164
1383640_at	Pign_predicted		1	1	1	1	1	1	-4.46066	-3.80636	1	-4.66472	1	-4.26845	-7.56631	-3.3111	-1.95172	-3.42305	-3.63475	-2.09814	-4.3982
1393902_at	Akr1c1	aldo-keto reductase family 1, member C6	1	1	-2.66486	-2.18903	1	1	-2.68553	-3.29907	-5.48321	-6.60423	-7.49582	-2.41141	-8.25365	1	-2.19848	-2.36423	-5.21319	1	-2.20972
1380278_at	1380278_at		1	-1.54106	-1.38209	1	-1.34818	1	-3.14069	-2.24242	-2.64052	-2.86966	-4.17895	-2.98711	-5.11833	-2.08774	-2.36457	-2.42722	-2.25034	-1.69519	-2.57009
1387376_at	Aox1	aldehyde oxidase 1	-1.79881	-1.69517	-1.29621	-1.77458	-1.23704	-4.80149	-3.75151	-5.71047	-2.50614	-1.74137	-1.78945	-1.84934	-4.25962	-1.94071	1	-1.74143	-1.30806	-4.03037	1
1379250_at	Galm	galactose mutarotase	-1.4585	1	1	1	1	1	-2.62453	-2.28808	-2.35863	-3.03533	-2.94058	-2.43911	-3.57691	-2.88355	-2.3526	-2.01108	-2.23718	-1.93482	-2.42219
1368075_at	Lipa	lysosomal acid lipase A	1	-1.44823	1	-1.51624	1	1	-3.08515	-2.28303	-2.50349	-2.73001	-2.45502	-3.93926	-3.69989	-3.29339	-2.79483	-3.27368	-2.00102	-2.79744	-3.83765
1387609_at	Car5a	carbonic anhydrase 5a, mitochondrial	1	1	-1.99379	1	1	1	-4.38672	-2.22672	-3.0788	-2.06251	-4.18515	-2.31071	-4.06421	-2.9479	-2.28379	-3.1222	-2.35406	-1.83471	-3.08738
1392245_at	1392245_at		1	1	1	1	1	1	1	-2.75291	-2.88362	-2.56887	1	-3.61491	-3.82335	-2.31598	1	-2.55135	1	1	-4.4402
1393411_at	Cfp	complement factor properdin	1	1	1	-2.3794	1	1	-5.77977	-3.92451	-3.24849	-2.82042	-11.717	-3.89364	-4.1383	-4.2172	1	1	1	1	1
1377883_at	1377883_at		1	1	1	1	1	1	-6.22732	-3.66223	1	1	1	1	1	-4.35592	-3.73128	1	1	1	-2.90246
1374518_at	Tmem77	transmembrane protein 77	1	1	1	1	1	1	-3.08337	-2.55621	-2.37292	-3.13565	-3.52895	-4.26972	-3.34917	-2.68218	-3.05335	-2.84388	-2.17562	-1.84057	-1.95353
1369531_at	Sult1c2	sulfotransferase family, cytosolic, 1C, member 2	1	1	1	-1.76912	1	1	-3.47447	-2.8571	-2.53717	-3.10504	-7.20596	-1.95647	-3.20112	-3.47428	-2.14003	-1.80753	-1.89068	-3.1361	-2.85867
1382371_at	Tmem77	transmembrane protein 77	1	1	1	1	-1.32348	-1.50704	-3.69333	-2.73548	-2.50077	-4.23082	-6.55506	-5.24515	-4.5783	-3.51486	-2.65308	-2.61882	-1.90813	-2.00261	-3.77842
1377672_at	Sult1c2	sulfotransferase family, cytosolic, 1C, member 2	1.58634	1	1	-2.25114	1	1	-3.763	-3.10299	-2.05503	-3.52436	1	-1.9829	-3.99991	-4.45224	-2.23549	-3.41124	-2.10835	-2.21984	-6.42359
1398282_at	Kynu	kynureninase (L-kynurenine hydrolase)	1	1.1364	1	1.14183	1.1886	1	-4.10819	-2.91067	-4.83142	-2.74481	-2.78914	-1.96072	-4.11535	-2.12103	-1.571	-1.57016	-1.77681	-1.68987	-1.75876
1369546_at	Bbox1	butyrobetaine (gamma), 2-oxoglutarate dioxygenase 1 (gamma-butyrobetaine hydroxylase)	1	1	1	1.30831	1	1	-4.12841	-3.70079	-4.40206	-2.43463	-2.37099	-1.81821	-3.39283	-2.06079	-2.09823	-2.51398	-2.49617	-2.51683	-2.588
1391293_at	Bbox1	butyrobetaine (gamma), 2-oxoglutarate dioxygenase 1 (gamma-butyrobetaine hydroxylase)	1	1	-1.19657	1.40064	1.2015	1	-3.80465	-3.01278	-3.73178	-2.03872	-2.64913	-1.75426	-2.73448	-1.98465	-2.20958	-2.62196	-2.67492	-2.48908	-2.83512
1387665_at	Bhmt	betaine-homocysteine methyltransferase	1	1	1	1.46499	1.5373	1	-8.14372	-2.95009	-12.2895	-2.41963	-4.41047	-1.82052	-2.55936	-2.63146	-1.63934	-2.48615	-3.33769	-1.89013	-2.25109
1387053_at	Fmo1	flavin containing monooxygenase 1	1	1	-1.59664	1	1.48405	1.37499	-4.73888	-3.22707	-4.39194	-1.35811	-3.39344	-2.53637	-2.69533	-1.83549	-2.66065	-2.30961	-4.29671	-3.99713	-5.0228
1391211_at	Atp11c	Atpase, class VI, type 11C	1	1	1	1	1	-1.58639	-4.19765	-3.0826	-3.89489	-2.63864	-2.7694	-2.49777	-3.06592	-2.3666	-2.19131	-1.82602	-2.13061	-2.33417	-3.39861
1373924_at	Cpped1	similar to C530044N13Rik protein	1	1	1	1	1	1	-3.48755	-2.0105	-2.44168	-2.91733	-4.97903	-2.85437	-3.01148	-2.01565	-1.79811	-1.81189	-2.52026	1	-2.29547
1387203_at	Gckr	glucokinase regulatory protein	1	1	1	1	1	1	-3.1853	-3.1835	-3.50725	-3.15064	-4.06685	-2.61359	-3.91137	-2.02914	-1.83122	-1.84728	-1.98938	-1.60461	-2.46013
1368543_at	Nox4	NADPH oxidase 4	1	1	1	1	1	1	1	1	1	1	1	1	1	1	-3.5158	-2.78728	-2.9403	1	-2.30502
1370609_a_at	Slc16a7	solute carrier family 16 (monocarboxylic acid transporters), member 7	1	-1.43425	1	1	1	1	-3.16634	-2.88518	-2.37984	-1.77948	-2.32572	-1.96758	-3.24807	-2.05582	-2.2777	-2.3494	-1.97443	-2.3168	-2.99294
1387084_at	Dpp4	dipeptidylpeptidase 4	1	1	1	1	1	1	-2.37496	-2.77876	-2.67264	-1.92243	1	-2.06963	-2.88943	-2.00726	-2.63589	-2.24372	-2.13993	-1.87806	-2.8449
1381771_at	P2ry13		1	1	1	1	1	1	-5.62295	1	-7.20119	1	1	1	1	1	1	1	1	1	1
1373025_at	C1qc	complement component 1, q subcomponent, C chain	1	1	1	1	1	1	-8.11725	-3.02871	-3.03007	-2.46317	-8.73561	-2.87922	-2.39068	-2.18232	-2.72499	-2.85339	-1.82916	-1.74464	-2.2275
1370215_at	C1qb	complement component 1, q subcomponent, beta polypeptide	1	1	1	-1.80768	1	1	-5.51288	-2.52052	-3.23986	-2.14256	-4.70512	-2.48343	-2.79725	-2.04149	-2.35951	-2.88594	-1.71058	1	-1.56289
1396933_s_at	Akr1c14	aldo-keto reductase family 1, member C14	1	1	1	1	1	1	-3.52404	-2.784	-3.21992	-3.36075	-4.06992	-3.19125	-2.78534	-1.52801	-2.16402	-1.86152	-1.87457	-2.90201	-2.25981
1377135_at	Alox5		1	1	1	1	1	1	-3.91196	1	1	-3.26627	1	1	1	1	1	1	1	1	1
1383692_at	LOC683855	hypothetical protein LOC683855 /// PRELI domain containing 2	1	1.78493	1	1	1	1	-2.78016	-1.96223	-2.88867	-3.35445	1	-2.89359	-3.54301	-3.42914	-3.25425	-2.61611	-1.91497	-1.83469	-2.11273
1388605_at	Wfdc3	WAP four-disulfide core domain 3	1	1	1	1	1	1	-3.17539	-2.78647	-4.24265	-2.3237	1	1	-3.55119	-2.97557	1	1	1	1	1
1382227_at	Agpat3	1-acylglycerol-3-phosphate O-acyltransferase 3	1	1	1	1	1	1	1	-6.7046	1	1	1	1	1	1	1	1	1	1	1
1379814_at	1379814_at		1	1	1	1	1	1	-5.8411	1	1	1	1	1	1	1	1	1	1	-4.27518	1
1396103_at	Cmbl	carboxymethylenebutenolidase homolog (Pseudomonas)	1	1	1	1	1	1	-4.20887	-5.0989	-4.03612	1	-3.05606	-2.53484	-4.69433	-2.22727	-1.58432	-1.91475	-1.82306	-2.51538	1
1373790_at	Car14	carbonic anhydrase 14	1	1	1	1	1	1	-3.29721	-3.81752	-4.09221	-4.30626	-8.18768	-3.39149	1	-4.21488	-2.17002	-2.40912	-2.60441	-2.77692	-3.27896
1383633_at	Osbpl1a		-1.58702	-1.48438	1	1	1	1	-4.60544	-2.95628	-3.18251	-8.08891	-7.70437	-10.1247	-2.71549	-3.33461	-2.4784	-2.78406	-2.23681	-2.21053	-3.06198
1386937_at	Atp1b1	ATPase, Na+/K+ transporting, beta 1 polypeptide	1	1	1	1.83497	1	1	-5.19076	-2.5838	-3.79321	-2.61222	-3.20893	-3.47964	2.28756	-3.6357	-3.26857	-3.15663	-4.63703	1	-2.52523
1367652_at	Igfbp3	insulin-like growth factor binding protein 3	1	1	1	1	1	1	-4.96294	-3.67811	-3.28937	-3.86056	-6.53602	-3.6869	-2.036	-2.73986	-3.36065	-2.17612	-2.80948	-1.6225	-2.61974
1386881_at	Igfbp3	insulin-like growth factor binding protein 3	1	-1.52138	1	1	1	1	-6.64859	-4.37391	-4.03118	-4.49369	-4.60877	-4.50851	-2.21566	-3.66039	-4.27051	-2.56299	-3.26452	-1.95399	-4.73241
1395255_at	1395255_at		3.03708	2.42527	1.91849	1	3.34341	1.94007	-2.05473	-1.95214	-1.96621	-14.6221	-6.31898	-14.5207	-5.16024	-4.13087	-3.72672	-2.40673	-2.85201	-1.3631	-3.06887
1387740_at	Pex11a	peroxisomal biogenesis factor 11A	1	1	1	1	1	1	-2.39056	-2.25583	-2.33026	-3.79097	1	-3.32556	-2.5303	1	-4.92462	-3.87903	-7.44413	-2.8747	-4.06815
1388348_at	Elovl5		1	1	1	1.59103	-1.75402	1	-2.13846	-2.94488	-2.81944	-2.49755	-2.43021	-1.93779	-3.04056	1	-2.61162	-2.93374	-2.18862	-2.05545	-3.04304
1387630_at	Elovl5	ELOVL family member 5, elongation of long chain fatty acids (yeast)	1	1	1	1.65302	-1.84428	1	-2.42241	-4.01405	-3.42868	-2.93285	-2.3103	-1.98756	-3.934	1	-3.09485	-3.43926	-2.42206	-2.43436	-3.15824
1372755_at	Mal2	mal, T-cell differentiation protein 2	1	-1.37411	1	1	1.35443	1.27013	-1.89074	-2.49206	-2.85726	-2.36992	-2.43188	-2.66067	-3.37291	-1.98992	-2.50927	-4.01514	-3.47544	-4.83977	-3.68459
1374615_at	1374615_at		1	1	1	1	1	1	-2.57376	-1.66656	-2.60514	-2.60721	1	-4.40744	-2.46504	-1.87426	-2.76967	-2.44279	-2.61699	-2.59575	-5.43967
1376800_at	Chn2		1	1	1	1.54729	1	1	-1.80819	1	1	-2.70758	-2.35236	-2.18848	-2.49715	-2.28412	-2.44333	-2.81086	-2.33213	-2.33226	-2.32385
1369679_a_at	Nfia	nuclear factor I/A	1	1	1	1	1	1	-3.04884	-2.67722	-2.03137	-4.42695	-4.67989	-4.08935	-2.81562	-2.96752	-1.83058	-2.45912	-2.50806	-2.4042	-2.71927
1375247_at	Mgll	Monoglyceride lipase	1	1	1.47024	1	1	1.37457	-3.19589	-2.27158	-3.03303	-3.43526	-4.72004	-2.87037	-2.01416	-3.2335	-1.83077	-2.68505	-2.17302	-3.87955	-2.93136
1389345_at	LOC690634		1	1	1	1	1	1	-2.87714	-2.54811	-4.5114	-3.63471	-4.73341	-4.90545	-2.18724	-1.96412	-3.20134	-1.79883	-2.25433	-2.04986	-3.01778
1371139_at	Pls3	plastin 3 (T-isoform)	1	1	1	1	1	1	-5.75466	1	-3.47291	-3.26933	1	-5.36391	1	1	-3.50089	-4.7416	1	-2.61108	1
1386960_at	Slc37a4	solute carrier family 37 (glucose-6-phosphate transporter), member 4	-1.28008	1	-1.23561	1.20818	1	1	-3.43943	-2.74886	-2.32483	-2.68168	-3.9404	-2.96398	-2.47278	-1.91752	-3.57967	-3.34549	-3.04489	-2.83713	-3.51216
1368617_at	Serpina5	serine (or cysteine) peptidase inhibitor, clade A, member 5	1	1	1	1	1	1	1	1	1	1	1	1	-2.77481	1	1	1	1	-6.6302	-6.63645
1392329_at	Homez	homeodomain leucine zipper-encoding gene	1	1	1	1	1	1	1	1	1	1	1	-4.93389	1	1	1	1	-5.88018	1	1
1369826_at	Atxn3	ataxin 3	1	1	1	1	1	1	1	1	1	1	1	1	1	1	1	1	-3.936	-3.40321	1
1392324_at	Eps8l2	EPS8-like 2	1	1	1	1	1	1	1	1	1	1	1	1	1	1	1	1	1	-9.53857	-3.91668
1379652_at	Ahctf1	AT hook containing transcription factor 1	1	1	1	1	1	1	1	1	1	1	1	1	1	1	1	1	-2.49629	-3.10656	-5.15171
1374628_at	Cryz	crystallin, zeta	1	1	-1.83394	1	1	-1.39756	-2.12471	-1.68817	-1.74965	-2.49264	1	-3.58343	-2.46949	-1.48212	-2.40231	-2.35496	-1.87057	-2.08394	-1.82306
1397596_at	Trim2	tripartite motif protein 2	1	-2.00246	1	1	1	1	-2.27048	1	-1.72673	-2.14169	-2.9052	-2.38637	-2.28892	-1.93335	-2.89023	-2.71875	-2.16374	-2.30028	-1.99222
1394617_at	Abhd15	similar to abhydrolase domain containing 1; alpha/beta hydrolase-1; lung alpha/beta hydrolase 1	1	1	-1.81504	1	1	1	-2.05947	1	-2.10395	-2.25647	1	-2.09185	-1.71705	-1.69239	-2.59296	-2.19837	1	-2.54538	-2.57754
1372023_at	LOC498674		1	-1.46154	-1.50173	1	1	1	-1.76656	-1.64791	-1.48971	-2.84161	-2.78062	-2.76988	-1.83256	-1.97341	-2.58551	-2.52558	-1.98434	-2.31741	-2.87546
1392460_at	1392460_at		1	1	1	1	1	1	1	1	1	-3.08982	1	-2.38115	1	1	-2.9529	-2.04801	1	1	-2.33282
1370811_at	Mpst	mercaptopyruvate sulfurtransferase	-1.37843	-1.31028	-1.38438	1	1	1	-1.51701	-1.45246	-1.50016	-2.67304	-4.29694	-2.57215	-1.92871	-2.02629	-2.59248	-2.72395	-2.66869	-2.66572	-2.25908
1370030_at	Gclm	glutamate cysteine ligase, modifier subunit	1	1	1	1	-1.40711	1	1	-1.79947	1	-2.10907	-3.38719	-2.40376	-2.10338	-1.56828	-2.26164	-2.79602	-2.29405	-2.35545	-2.67251
1368794_at	Haao	3-hydroxyanthranilate 3,4-dioxygenase	1	1	-1.34042	1	1	1	-2.07362	-1.7226	-1.81633	-2.69978	-3.1526	-1.8825	-2.28239	-1.52686	-2.12639	-2.65227	-1.87044	-2.55517	-2.07033
1373754_at	LOC680692		-1.55224	1	1	1	1	1	-1.7391	1	1	-2.70102	-3.70786	-2.47452	-2.12649	-1.75325	-1.99536	-2.44307	-2.5849	-2.15921	-2.35624
1371997_at	Akr1cl2	aldo-keto reductase family 1, member E1	1	1	1	1	1	1	-1.55729	-1.7064	-1.49547	-2.85886	-4.24085	-2.38133	-2.27475	-1.51161	-2.29689	-2.28155	-2.8161	-1.93358	-1.67822
1368618_at	Grb14	growth factor receptor bound protein 14	1	1	1	1	1	1.21636	-1.48095	-1.41229	-1.34097	-3.81951	-2.9241	-2.6759	-2.14226	-1.5972	-2.40175	-2.43079	-1.96023	-2.71703	-2.39089
1373650_at	Cmas	cytidine monophospho-N-acetylneuraminic acid synthetase	-1.44024	1	1	1	1	1	-1.38507	-1.69461	1	-2.7099	-2.36932	-3.59301	-2.64788	-1.85809	-2.63548	-2.48471	-2.40779	-2.84211	-2.30688
1387570_at	Manea		1	1	1	1	1	1	-1.90087	-1.85965	1	-3.19463	-3.05354	-3.49396	-1.77517	1	-2.57696	-2.02606	-2.01151	-2.71126	-3.93768
1391154_at	1391154_at		1	1	1	1	1	1	1	1	1	-6.19297	1	-6.4598	1	1	-2.22894	-2.37378	-2.74089	-1.82601	-4.54769
1374770_at	Asah1	N-acylsphingosine amidohydrolase 1	1	1	1	1	1	1	-1.8612	1	1	-2.04056	-4.95114	-2.41883	1	-2.13001	-2.4665	-2.15341	-2.91134	-1.96772	-3.06122
1368038_at	Synj2bp	synaptojanin 2 binding protein	1	1	1	1	1	1	-1.69245	-1.71839	-1.5848	-2.15633	-3.47414	-2.65696	-1.47394	-2.0247	-2.17159	-2.52355	-2.75235	-2.00078	-2.65078
1374620_at	Ceacam1	CEA-related cell adhesion molecule 1	-1.18409	-1.16556	-1.5065	1	1	1	-2.0951	-1.75947	-1.74378	-2.48059	-2.78866	-2.62582	-2.4773	-1.71743	-2.17763	-2.908	-2.41783	-1.93409	-3.42389
1372715_at	Sfxn1	sideroflexin 1	1	1	1	1	-1.25863	1	-1.86387	-1.60758	-1.63542	-2.7625	-2.47274	-3.4756	-2.17973	-1.32975	-3.13658	-2.78357	-2.7535	-2.80253	-3.70694
1368600_at	Slc26a1	solute carrier family 26 (sulfate transporter), member 1	1	1	1	1	1	1	-1.86856	-1.7235	-1.95643	-1.83079	-2.11313	-1.90997	-1.95011	-1.55699	-3.19284	-2.76778	-2.23532	-2.88968	-3.22442
1392988_at	Nsdhl	NAD(P) dependent steroid dehydrogenase-like	1	1	-1.51184	1	1	1	-1.63158	-1.67514	-1.79598	-2.59772	-2.89309	-3.10288	-3.03444	-2.04688	-3.87268	-3.27791	-2.48524	-3.48564	-3.01347
1368608_at	Cyp2f4	cytochrome P450, family 2, subfamily f, polypeptide 4	1	1	1	1	1	1	-2.52993	-1.38669	-2.44352	-3.61915	-5.58144	-2.10993	-2.64314	1	-3.17816	-2.76951	-3.94479	-2.63971	-4.1626
1368325_at	Egf	epidermal growth factor	1	1	1	1	1	1	-2.14415	1	-1.73577	-2.2984	1	-3.01464	-1.8942	-1.71241	-2.70602	-2.54133	-2.73202	-2.09658	-3.47477
1380159_at	Peo1	progressive external ophthalmoplegia 1 (human)	1	1	1	1	1	1	1	1	1	1	1	-2.51595	1	1	-2.98977	-3.94827	-5.00885	-3.40412	-3.28311
1379092_at	1379092_at		1	1	1	1	1	1	1	1	1	-3.2769	1	1	1	1	1	1	1	1	1
1382464_at	RGD1309779	similar to ENSANGP00000021391	-1.40345	1	-1.41556	1	1	1	-1.45635	-1.42703	-1.35082	-2.76384	-4.1371	-2.49228	-2.06427	-1.39083	-3.13533	-3.21412	-2.16583	-2.69243	-2.2562
1386946_at	Cpt1a	carnitine palmitoyltransferase 1a, liver	-1.41011	1	1	1	1	1	-1.54753	1	1	-2.92067	-2.29834	-3.00475	-1.72475	1	-4.98122	-2.73687	-2.24867	-2.2769	-3.37891
1376936_at	Slc24a6	solute carrier family 24 (sodium/potassium/calcium exchanger), member 6	1	1	1	1	1	1	1	1	1	-2.00981	-2.16027	-2.15766	-1.71869	1	-3.84276	-3.22655	-2.64077	-2.93827	-3.07395
1395878_at	1395878_at		1	1	1	1	1	1	1	1	1	1	1	1	1	1	-4.34201	-2.65923	1	-2.9445	1
1375423_at	LOC689959	hypothetical protein LOC689959	1	1	1	1	1	1	1	1	1	-2.17147	-4.33445	-3.28634	-1.6744	1	-3.32947	-4.01368	-2.72215	-3.05905	-3.03032
1395316_at	Mageh1	melanoma antigen, family H, 1	1	1	1	1	1	1	1	1	1	-2.2951	1	1	1	1	-2.45261	-4.64828	-2.7897	-3.32082	-3.93149
1398472_at	Peo1	progressive external ophthalmoplegia 1 (human)	1	1	1	1	1	1	1	1	-1.88605	-2.04085	1	-2.21522	-1.69719	1	-2.65024	-3.71264	-2.98786	-2.92782	-4.11474
1384240_at	Agtr1a	angiotensin II receptor, type 1a	1	-1.3785	1	-1.52665	-1.59422	1	-1.43132	1	1	-2.68273	-2.68129	-2.36244	-2.35355	-1.50072	-2.52401	-2.49186	-2.7378	-2.52765	-2.6444
1398448_at	Tscot_predicted		1	1	1	1	1	1	1	1	1	-2.1303	-2.8469	-1.78358	-2.00963	-1.59803	-2.74195	-3.45408	-3.28281	-2.80047	-2.748
1367869_at	Oxr1	oxidation resistance 1	1	1	1	1	1	1	1	1	1	-2.12951	1	-3.12897	1	-1.6637	-1.81976	-3.30575	-2.60578	-2.45593	-3.27122
1385669_at	Mad1l1	mitotic arrest deficient 1-like 1	1	1	1	1	1	1	1	1	1	1	1	1	1	1	-3.5192	-3.18203	1	-2.87534	1
1368340_at	Ipmk	inositol polyphosphate multikinase	1	1	1	1	1	1	1	1	1	-2.20741	1	-2.4111	1	1	-2.5174	-3.7789	-3.11427	-2.32971	-3.35603
1371629_at	Cxxc5	CXXC finger 5	-1.3796	-1.83372	-1.44281	1	1	1	1	1	1	-1.93791	-2.50858	-1.57326	-1.86232	-2.08464	-3.78108	-3.84262	-4.15009	-3.56568	-2.92875
1370331_at	Il11ra1	interleukin 11 receptor, alpha chain 1	1	-1.93732	1	1	1	1	1	1	1	-2.81101	-2.89106	-2.28327	1	-1.79479	-2.78177	-2.88813	-2.1484	-2.51609	1
1390883_at	Akap11	A kinase (PRKA) anchor protein 11	1	1	1	1	1	1	1	1	1	1	1	1	1	1	1	-5.29516	-3.49017	1	1
1390563_at	Abca3	ATP-binding cassette, sub-family A (ABC1), member 3	1	1	1	1	1	1	1	1	1	1	1	-2.92554	-2.64673	1	-2.53536	-2.68664	-3.14663	1	-3.67768
1373338_at	Vmac		1	1	1	1	1	1	1	1	1	1	1	-3.63102	-2.6729	1	-2.99307	-2.82805	-4.11806	-2.5106	-3.16084
1371606_at	Wdtc1	WD and tetratricopeptide repeats 1	1	1	1	1	1	1	-1.77462	1	1	-3.38602	-4.68402	-4.52655	-1.85416	-2.11516	-2.83566	-2.84753	-3.07013	-2.56169	-2.65493
1377692_at	RGD1565310	similar to RIKEN cDNA 1110018J12	1	1	1	1	1	1	1	1	1	-2.81435	1	-3.36562	1	1	-4.63269	-2.69339	-3.74694	1	-3.38514
1370889_at	Cyp4v3	cytochrome P450, family 4, subfamily v, polypeptide 3	-1.92458	1	1	-1.88315	1	1	1	1	1	-2.2469	-4.49876	-2.46741	-2.07844	-3.22083	-3.40594	-3.24206	-3.01656	-2.44918	-3.25726
1397740_at	Sfxn1	sideroflexin 1	-1.39273	1	1	1	1	1	-2.13359	-1.93534	-1.85895	-4.22742	-3.81377	-5.98447	-2.39981	-1.59508	-5.15039	-3.57534	-3.0097	-3.40519	-5.17881
1395920_at	Tmem106b	transmembrane protein 106B	1	1	1	1	1	1	-2.08236	1	1	-3.00252	1	-5.95345	1	1	-3.90241	1	1	1	-4.52522
1375674_at	RGD1310686	similar to chromosome 16 open reading frame 5	1	1	1	1	1	1	-2.149	-2.10669	-1.5046	-3.80561	-2.76812	-3.68893	-2.09525	-2.02373	-2.57103	-3.31429	-2.87519	-3.52026	-3.69864
1392604_at	Nsdhl		-1.61966	-1.41599	-1.38892	1	1	1	-1.65819	-2.028	-1.70973	-3.0683	-3.34343	-3.8421	-3.18508	-2.2098	-3.90079	-4.62838	-2.85567	-3.97052	-4.14492
1390530_at	1390530_at		1	1	1	1	1	1	-1.90786	-1.90708	-1.35159	-3.4517	-5.74167	-6.3455	-2.57837	-1.99818	-3.20069	-4.01128	-2.53278	-2.97912	-3.93456
1374800_at	Slc25a15		1	1	1	1.65665	1.48308	1.30186	-2.2571	-1.58457	-2.02744	-2.82774	-2.64019	-2.70828	-1.66538	1	-3.69692	-3.07114	-4.3973	-1.70559	-4.93312
1383731_at	Tmem106b	transmembrane protein 106B	1	1	1	1	1	1	-3.0533	-2.19033	-1.80512	-3.2823	-5.11492	-3.60143	-2.23286	-1.65268	-3.29432	-3.03235	-3.08921	-2.80067	-3.9917
1374444_at	Plxnb1	plexin B1	1	-1.85075	1	1	1	1	-1.95598	-2.0314	-2.29397	-3.45371	1	-2.77706	1	-2.31881	-3.81401	-6.36131	-3.71945	-7.11505	-4.22757
1367996_a_at	Lphn1	latrophilin 1	1	-1.63871	1	1	1	1	-1.65579	-1.75554	-1.75416	-3.56902	-6.42254	-3.75415	-2.40226	-2.30627	1	1	1	-5.84981	1
1379868_at	Pbxip1	pre-B-cell leukemia transcription factor interacting protein 1	1	1	1	1	1	1	1	1	1	1	1	-6.96679	1	1	-4.08198	-4.18566	-3.06446	1	-3.06986
1378998_at	1378998_at		1	1	1	1	1	-2.34793	-3.04803	1	1	-2.68304	1	-4.1651	1	-2.54512	-3.7692	-4.07373	-1.79421	-2.66273	-3.67938
1372181_at	Rpa1	Replication protein A1	1	-1.56333	1	1	1	1	-2.12837	-1.73019	1	-4.07096	-3.28013	-4.34956	1	-2.81997	-2.87018	-3.54577	-3.01329	-2.52325	-3.50244
1374624_at	Galnt11	UDP-N-acetyl-alpha-D-galactosamine:polypeptide N-acetylgalactosaminyltransferase 11	-1.3536	1	1	1	1	1	-1.89666	-1.56412	-1.52521	-2.76805	-2.58775	-3.24573	-1.78122	-2.21854	-3.80867	-3.46301	-3.06502	-2.54592	-3.50764
1371363_at	Gpd1	glycerol-3-phosphate dehydrogenase 1 (soluble)	1	1	1	1.2569	1	1	-1.70485	-1.53242	-1.48203	-4.6124	-5.05655	-3.74507	-1.57383	-1.43264	-3.086	-3.51162	-2.92136	-3.31195	-2.90098
1393096_at	RGD1560633	similar to ribosomal protein L27a	1	1	1	1	1	1	1	1	1	-6.28472	1	-6.58651	1	1	1	-5.0098	-6.47508	1	1
1380393_at	Cryz	crystallin, zeta	1	1	1	1	1	1	1	-2.19359	1	-3.42265	-4.82466	-8.84502	-2.83381	-2.11934	-4.40485	-4.39117	-3.7786	-3.15716	-3.01757
1386538_at	RGD1310495	similar to KIAA1919 protein	1	1	1	1	1	1	-2.4631	-1.86866	-1.83067	-2.38985	-3.62773	-3.15096	-2.70155	-2.34593	-3.56574	-2.95842	-3.2213	-3.05099	-5.19661
1390993_at	Pbld	phenazine biosynthesis-like protein domain containing	1	1	1	1	1	1	-3.40853	1	1	-2.21602	-2.65866	-5.78784	-4.81592	-1.71368	-11.4666	-3.46618	-4.89661	-2.47493	-9.17526
1382924_at	Pank1	pantothenate kinase 1	1	1	1	1	1	1	-2.82925	-2.12426	-2.12661	-4.63268	-6.5719	-2.87234	-3.99902	-3.53823	-5.56328	-4.5824	-3.36623	-4.43129	-4.512
1371580_at	Erlin1	ER lipid raft associated 1	-1.48067	1	1	-1.3478	1	1	-2.38961	-1.90204	-1.81719	-3.77748	-6.35804	-4.73148	-2.74928	-2.48707	-4.94484	-4.01103	-3.25125	-3.34131	-6.30283
1368365_at	Aldh3a2	aldehyde dehydrogenase family 3, subfamily A2	-1.23918	1	1	1	1	1	-2.41614	-1.92237	-1.74073	-4.85598	-4.46572	-3.97208	-2.99582	-2.03322	-3.72243	-3.73647	-3.27271	-3.02259	-5.11341
1389054_at	LOC498368	similar to RIKEN cDNA 0610040J01	1	1	1	1	1	1.57588	-1.79715	-1.74738	1	-13.6008	-6.28617	-14.0881	-3.71318	-2.77214	-4.0088	-3.6391	-2.87608	-4.61086	-4.10078
1369560_at	Gpd1	glycerol-3-phosphate dehydrogenase 1 (soluble)	1	1	1	1	1	1	-2.21157	-1.83681	-1.68536	-5.7126	-7.07672	-4.14586	-2.33792	-1.52957	-3.6694	-4.78247	-3.15768	-3.75719	-3.46184
1376919_at	RGD1562317	similar to expressed sequence AW212394	1	1	1	1	1	1	-1.56981	-1.9839	-1.48297	-2.55741	-2.69182	-3.28495	-3.03066	-2.12369	-3.85328	-4.65614	-3.57992	-3.76947	-4.74699
1383907_at	1383907_at		1	1	-1.3916	1	1	1	-1.54066	-1.45053	1	-3.13759	-3.76311	-3.85209	-3.0516	-1.86087	-3.50671	-4.60843	-4.302	-3.77696	-3.57574
1373312_at	Pnkd	paroxysmal nonkinesiogenic dyskinesia	1	1	1	1	1	1	-1.53042	1	1	-3.73517	-9.12223	-3.88624	-2.77961	-1.89385	-3.3476	-4.11982	-3.9404	-3.52394	-4.84982
1369722_a_at	Xylt2	xylosyltransferase II	1	1	1	1	1	1	1	1	1	-3.33717	1	-2.73042	-2.52825	-2.62251	-4.64099	-3.74582	-3.50037	-3.14434	-3.45348
1367836_at	Cpt1a	carnitine palmitoyltransferase 1a, liver	-1.57912	1	1	1	1	1	-1.6499	1	-1.45969	-3.07395	-2.01043	-3.43048	-2.13162	1	-7.64345	-3.61515	-2.6865	-3.09568	-3.96507
1394456_at	1394456_at		1	1	1	-1.43142	1	1	-1.82886	-1.43433	1	-3.40206	-7.0992	-5.85516	-2.50697	-3.47873	-3.25244	-4.59724	-2.94928	-3.31061	-3.33883
1377742_at	LOC366300	hypothetical LOC366300	1	1	1	1	1	1	-1.71816	1	1	-3.80273	-1.90699	-4.00291	-2.00632	-2.91325	-3.84628	-3.72815	-3.52498	-2.56282	-5.09016
1392486_at	Tmem106b	transmembrane protein 106B	1	1	1	1	1	1	-2.22487	-1.80869	-1.44665	-2.64261	-3.22373	-3.30012	-2.07552	-1.68782	-3.50091	-3.13945	-3.06975	-3.05557	-4.78816
1371702_at	Tspan7	tetraspanin 7	1	1	1	-1.64405	1	1	-2.51006	-1.90942	-2.1327	-2.76749	-3.89434	-2.49507	-2.06837	-1.90528	-3.18146	1	-2.83776	-2.36137	-2.75867
1392648_at	Mrc1	mannose receptor, C type 1	1	1	1	-1.50901	1	1	-3.12001	-2.70496	-2.43858	-2.91767	-3.47129	-2.98959	-1.8545	-1.82388	-4.01487	-3.60607	-3.14232	-3.17628	-3.89273
1384296_at	RGD1311909_predicted		1	1	1	1	1	1	1	1	1	1	1	1	1	1	-2.86963	-3.15793	1	1	-3.67917
1373921_at	LOC684538	similar to enoyl Coenzyme A hydratase domain containing 3	1	1	1	1	1	1	-2.35325	-1.62779	-2.11603	-1.82715	-3.06202	-1.88797	-2.56361	-1.86429	1	1	-2.74909	1	-1.99623
1383567_at	Colec11_predicted		1	1	1	1	1	-1.18066	-2.5952	-1.75836	-1.90226	-2.46206	-2.09234	-2.08278	-2.41479	-1.86665	-5.54393	-3.87592	-5.20952	-3.33911	-4.36717
1376972_at	Slc40a1	Solute carrier family 39 (iron-regulated transporter), member 1	1	1	1	1	1	1	-1.99501	1	1	-2.47329	-5.74866	-2.03137	-2.05959	-2.039	-3.36259	-5.04029	-3.47058	-3.95811	-7.26996
1384361_at	Mal2	mal, T-cell differentiation protein 2	1	1	1.40981	-1.53753	1	1.55562	-1.91102	-3.16039	-3.23328	-1.8376	-2.05233	-2.4799	-2.8477	-1.8866	-2.44792	-3.09111	-3.01616	-3.87961	-3.13839
1369270_at	Nr1i2	nuclear receptor subfamily 1, group I, member 2	1	1	1	1.64767	1	1	-2.07371	-2.25062	-2.04458	-3.24474	-3.39709	-2.68548	-1.53539	1	-5.08238	-2.9589	-2.97514	-2.61384	-3.08898
1372748_at	Tbc1d2b	TBC1 domain family, member 2B	1	1	1	1	1	1	1	1	1	1	1	-2.92264	1	1	-5.08564	-7.3479	-4.08221	-3.42704	1
1388734_at	1388734_at		1	1	1	1	1	1	-2.13836	-2.2745	1	1	-3.77337	-3.42148	1	1	-2.96651	-4.00273	-3.18916	-3.47833	-2.83736
1384279_at	Fam117b	amyotrophic lateral sclerosis 2 (juvenile) chromosome region, candidate 13 (human)	1	1	1	1	1	1	1	1	1	1	1	1	1	1	1	1	-7.50524	1	1
1375542_at	Rdx	Radixin	1	1	1	1	1	1	1	1	1	1	1	1	1	1	1	-8.53013	-3.08545	1	1
1385127_at	Bmp5	bone morphogenetic protein 5	1	1	1	1	1	1	1	-2.06286	1	1	1	1	1	1	-3.20381	-4.65825	-3.89116	-2.62573	-4.35167
1375983_at	Mamdc2	MAM domain containing 2	1	1	1	1	1	1	1	1	1	1	1	1	1	1	1	-9.72028	-4.81455	1	-6.24265
1388784_at	Csf1r	colony stimulating factor 1 receptor	1	1	1	1	1	1	1	1	1	1	1	1	1	1	-4.06791	-4.99606	-3.98095	-2.98871	-4.46648
1381124_at	Slc25a15		1	1	1	1.63814	1.61274	1.39767	-2.19413	-1.70629	-1.99441	-2.87131	-1.99061	-2.01507	-1.62058	1	-3.98299	-3.69653	-4.58546	-1.90944	-4.16451
1373693_at	Gprc5c	G protein-coupled receptor, family C, group 5, member C	1	1	1	1	1	1	1	1	1	-2.69325	1	-5.56365	-2.88457	-3.45082	-3.00742	-4.01541	-6.37585	-5.64306	-3.49731
1375020_at	Rin3	Ras and Rab interactor 3	1	1	1	1	1	1	-2.12562	1	1	1	1	-2.21257	-2.07615	-2.03989	-4.03181	-4.25689	-3.96288	-3.94715	-3.43196
1385334_at	LOC266761		1	-1.36417	1	1	1	1	-1.74687	-1.52576	-1.40594	-1.65267	-1.98021	-2.75051	-2.35902	-1.87754	-2.05283	-3.61939	-5.38879	-3.38733	-5.92489
1374697_at	Plekhg5	pleckstrin homology domain containing, family G (with RhoGef domain) member 5	1	1	1	1	1	1	1	1	1	-1.90231	1	-1.88418	1	-1.99187	-6.25756	-3.94577	-3.57993	-3.40727	-3.01296
1370063_at	Nr2f2	nuclear receptor subfamily 2, group F, member 2	1	1	1	1	1	1	1	1	1	1	1	-2.45717	-2.26886	1	-3.48946	-2.73526	-5.4535	-4.37674	-2.95804
1383117_at	Pxmp4	peroxisomal membrane protein 4	-1.34587	1	1	1.71748	-1.35172	1	-1.54516	-1.5528	-2.06779	-2.3683	-1.48394	-1.60591	-1.92517	-6.08808	-4.30836	-4.45065	-3.93177	-3.60904	-4.52587
1378287_at	Rdx	radixin	1	1	1	1	1	-1.2365	-1.77358	-1.60158	-1.44291	-2.22069	-2.03857	-2.18361	-2.10369	-1.98587	-3.78238	-3.46292	-2.92258	-3.59683	-3.81424
1390777_at	Sc5dl	sterol-C5-desaturase (fungal ERG3, delta-5-desaturase) homolog (S. cerevisae)	1	1	1	1	1	1	-1.61884	-1.48599	1	-2.07006	-1.74035	-1.552	-2.45749	-1.57642	-3.10189	-3.37711	-3.65312	-2.96205	-4.54553
1389498_at	Tysnd1	trypsin domain containing 1	1	1	1	1	1	1	-1.46675	-1.52675	1	-2.6599	-2.03824	-2.86342	-2.58295	-1.79504	-4.0344	-3.56935	-6.262	-4.27239	-3.21635
1372101_at	Ppap2b	phosphatidic acid phosphatase type 2B	1	1	1	-1.19392	-1.1326	-1.33487	-1.79776	-1.29747	-1.44209	-2.0649	-2.34152	-2.09741	-1.85967	-1.58884	-4.90159	-3.41851	-3.62727	-3.60754	-4.70476
1388619_at	Rdx	radixin	1	1	1	1	1	1	-1.8305	-1.59925	-1.51568	-2.28686	-2.73022	-2.41501	-2.27763	-2.06751	-4.74526	-3.95542	-3.81489	-3.97994	-4.60993
1393098_at	Llgl2	lethal giant larvae homolog 2 (Drosophila)	1	1	1	1	1	1	1	1	1	1	1	-2.51041	-5.03079	-3.10048	-3.83212	-4.45815	-3.86204	-3.30459	-3.30621
1378575_at	Asl		1	1	1	1	1	1	1	1	1	1	1	1	1	1	-3.5675	-2.86502	-3.20566	-6.62329	-4.30207
1380015_at	Crot		1	1	1	1	1	1	1	1	1	1	1	-7.34293	1	1	1	1	1	1	1
1388661_at	Mtp18	mitochondrial protein 18 kDa	1	1	1	1	1	1	1	1	1	-3.57351	1	-3.01865	1	1	-3.15617	-2.72205	-3.91239	-6.51512	-2.63812
1386945_a_at	Prkab1	protein kinase, AMP-activated, beta 1 non-catalytic subunit	1	1	1	1	1	1	-1.51668	1	1	-2.9211	1	-2.61871	1	1	-3.20633	-3.00159	-3.99975	-3.3986	-3.47155
1372526_at	Flcn	folliculin	1	1	1	1	1	1	1	-1.68184	1	-2.23957	-2.52805	-2.06027	1	1	-3.54574	-7.25826	-4.26286	-3.64109	-2.84625
1388561_at	Myl2		1	1	1	1	1	1	1	1	1	-3.19717	1	-2.99368	1	-1.9458	-2.65593	-3.29911	-5.22755	-5.47684	-2.51521
1375259_at	Eif4ebp2	eukaryotic translation initiation factor 4E binding protein 2	1	1	1	1	1	1	-2.02571	-1.94086	-1.83881	-2.11066	-1.71295	-2.31837	-1.39658	-1.75143	-3.35859	-3.27523	-3.91901	-3.20447	-3.17652
1371448_at	1371448_at		1	1	1	1	1	1	-1.73225	-1.732	-1.4939	-1.7283	-2.24219	-1.92485	-1.33173	-1.53193	-4.07761	-3.29794	-4.39754	-3.5966	-3.28269
1392566_at	Maf		1	1	1	-1.708	1	1	1	1	1	-2.09238	-4.7095	-1.97987	1	-1.69896	-3.06946	-4.65771	-4.29376	-3.84975	-4.19455
1374169_at	RGD1310686	similar to chromosome 16 open reading frame 5	1	1	1	1	1	1	-1.53362	-1.41584	1	-2.57871	-4.00722	-2.68507	-1.5488	-1.66888	-3.05606	-3.06092	-3.07556	-2.85618	-3.20781
1386718_at	Akr1c19	aldo-keto reductase family 1, member C19	1	1	1	1	1	1	-1.54409	-1.66704	1	-1.67591	-2.07069	-1.92136	-2.41063	-1.91917	-2.79304	-2.93011	-3.32698	-6.49806	-3.96206
1377740_at	1377740_at		1	1	1	1	1	1	1	1	1	-1.92763	1	-3.82238	1	-1.79005	-2.71342	-3.69709	-3.36193	-3.41759	-2.61288
1375011_at	1375011_at		1	1	1	1	1	1	1	1	1	1	1	1	1	1	-3.21012	-3.58215	-3.70387	-4.3301	-2.98363
1368270_at	Apobec1	apolipoprotein B editing complex 1	1	1	1	1	1	1	1	1	1	-2.44199	1	-3.05932	-2.42614	-2.4707	-2.67442	-2.4149	-2.45783	-3.0242	-2.44956
1382050_at	1382050_at		1	1	1	1	1	1	1	1	1	1	1	1	1	1	1	1	-3.28908	-8.38359	-8.44646
1394022_at	Id4	inhibitor of DNA binding 4	1	1	1	1	1	1	1	1	1	1	1	1	1	1	-6.17197	-4.37287	-3.13263	-4.18683	1
1392974_at	Wasf1	WASP family 1	1	1	1	1	1	1	1	1	1	1	1	1	1	1	-2.99911	-3.79122	-3.18438	-9.17313	-2.90231
1382197_at	Rhod	ras homolog gene family, member D	1	1	1	1	1	1	1	1	1	1	1	-2.23804	1	1	-3.08534	-3.34418	-3.01497	-5.45609	-2.81183
1383732_at	RGD1307603	similar to hypothetical protein MGC37914	1	-1.68214	-1.37069	1	1	-1.76399	-3.09457	-1.42932	-2.91062	-1.64268	1	-1.86904	-3.40043	-12.038	-1.75342	-2.01174	-2.50826	1	-1.66052
1390511_at	Psg16_predicted		1	1	1	1	1	1	1	1	1	1	1	1	1	-4.33047	1	1	1	1	1
1394077_at	Rnd3	Rho family GTPase 3	1	1	1	-2.27185	1	-2.25454	1	-2.41384	1	1	1	1	-4.43129	-3.86063	-3.23397	-3.47819	-1.88635	1	-2.15728
1367752_at	Bcar1	breast cancer anti-estrogen resistance 1	1	1	1	1	1	1	1	1	1	1	1	1	1	1	-4.70111	-3.08396	-6.44647	1	-4.29126
1376051_at	Cryl1	crystallin, lambda 1	1	1	1	1	1	1	1	1	1	1	1	1	1	1	1	1	-9.285	1	1
1396225_at	Cpeb2	cytoplasmic polyadenylation element binding protein 2	1	1	1	1	-2.36197	1	1	-3.51177	1	1	1	-2.36749	-5.1526	-2.87669	-3.24171	-3.67705	-3.81405	-2.16057	-2.23115
1370538_at	Lama3	laminin, alpha 3	1	1	1	1	1	1	1	-3.00254	1	1	1	1	-3.06355	-2.87366	1	1	1	1	1
1368621_at	Aqp9	aquaporin 9	1	-1.14766	1	-1.29635	-1.22133	1	-2.64213	-1.76063	-1.94252	-2.03906	-1.83843	-1.9271	-3.48065	-2.57963	-2.57987	-1.80861	-1.5353	-1.6868	-1.68591
1397268_at	Slc17a4	solute carrier family 17 (sodium phosphate), member 4	-1.63549	1	1	-1.75101	1	-1.53935	-2.48909	-1.72594	-1.85918	-2.0504	-1.83474	-1.99657	-3.16782	-2.08808	-2.32163	-2.20937	-1.62692	-1.52193	-3.97647
1396155_at	LOC361915		1	1	-1.41141	-1.8079	-2.63131	-1.58815	-2.00125	-1.76682	-2.17226	-4.60064	-1.87932	-1.85248	-3.59928	-1.67954	-3.87027	-1.86191	1	-2.10935	-2.87471
1396207_at	Rdx	radixin	-1.2985	-1.27682	-1.20798	-1.37318	-1.76483	-1.46089	-2.08053	-2.17274	-2.26237	-2.84934	-2.27195	-3.61741	-3.00134	-2.51404	-2.68352	-2.6715	-2.46998	-3.16158	-3.53618
1383825_at	Rdx	radixin	-1.21806	-1.19221	1	-1.30008	-1.45798	-1.39309	-2.01251	-2.04388	-2.00533	-2.6154	-2.06978	-2.61464	-2.60997	-2.19694	-2.39337	-2.47372	-2.07319	-2.87645	-2.87866
1393615_at	Depdc6	similar to DEP domain containing 6	-1.46786	1	-1.75218	-1.34507	1	-1.665	-2.19448	-2.13477	-2.05067	-2.98061	-1.89517	-3.09682	-3.17977	-2.76663	-2.83002	-3.08445	-3.05391	-2.60314	-3.36603
1390821_at	Pcdha1	protocadherin alpha 1 /// protocadherin alpha 10 /// protocadherin alpha 11 /// protocadherin alpha 12 /// protocadherin alpha 13 /// protocadherin alpha 2 /// protocadherin alpha 3 /// protocadherin alpha 4 /// protocadherin alpha 5 /// protocadherin alpha 6 /// protocadherin alpha 7 /// protocadherin alpha 8 /// protocadherin alpha 9 /// protocadherin alpha subfamily C, 1 /// protocadherin alph…	1	1	1	1	1	1	-2.16885	-2.69794	-2.19705	1	1	-2.5288	-2.26225	-1.96563	1	-2.14499	-2.27667	-2.36997	-4.85561
1397810_at	1397810_at		1	1	1	1	1	1	1	1	1	1	1	1	1	1	-3.96498	1	1	1	-4.55477
1368259_at	Ptgs1	prostaglandin-endoperoxide synthase 1	1	1	1	-1.76285	1	1	-2.58003	-2.96437	1	-3.2917	-3.40901	-3.02625	-3.21756	-2.88787	-2.69532	-3.05043	-3.71947	-2.63815	-4.06436
1387339_at	Sepp1	selenoprotein P, plasma, 1	1	-1.42747	1	1	1	1	-2.18566	-2.2799	-1.91044	-2.28199	-1.64204	-1.87204	-2.91597	-2.35807	-2.21757	-2.32945	-2.75753	-2.68153	-4.45986
1392384_s_at	Akr1d1	aldo-keto reductase family 1, member D1	1	-1.55098	-1.16715	1	-1.22966	-1.186	-1.87012	-2.46845	-2.03356	-2.01146	-1.7041	-1.74657	-2.8285	-3.11382	-1.66545	-2.04663	-2.28938	-2.71708	-5.36194
1395625_at	1395625_at		-1.41044	1	1	-1.42179	-1.6985	-1.72099	-1.74546	-1.52524	-1.50465	-2.80815	-3.13054	-3.09547	-3.24263	-1.5952	-2.6037	-2.26621	-2.36118	-2.96256	-2.45753
1383589_at	1383589_at		1	1	1	1	1	1	-1.878	1	1	-3.22156	1	-5.09185	-2.09374	1	-2.83913	-2.93922	-2.10118	1	-3.4053
1389169_at	Pgrmc2	progesterone receptor membrane component 2	1	1	1	1	-1.82228	1	-1.82735	-1.67588	-1.68768	-2.54973	-4.59849	-2.65959	-2.74249	-1.83471	-2.34219	-3.26456	-3.19303	-2.4171	-2.84918
1373161_at	Tmem98	transmembrane protein 98	1	1	1	1	1	1	-2.15332	-1.682	-1.90194	-1.82364	-2.48417	-2.02296	-3.3157	-2.49895	-2.81415	-2.72629	-2.51869	-2.99152	-3.26586
1372744_at	Pkp4	plakophilin 4	1	1	1	1	1	1	-1.59237	-1.49416	-1.47219	-1.62431	1	-2.24229	-2.19485	-2.1465	-3.25976	-4.33567	-3.31803	-2.33148	-2.81423
1378515_at	Pgrmc1		1	1	1	1	1	1	1	1	1	-2.23599	1	-2.10543	-2.75876	-1.96976	1	-2.24203	-2.74993	1	-2.60139
1384671_at	Gcgr		-1.79941	1	1	1	1	1	1	1	1	-2.2764	1	-2.14914	-3.28703	-1.9727	-2.4099	-3.22519	1	-3.39949	1
1393751_at	Fabp12		1	1	1	1	1	1	-2.42973	-1.60228	-1.55445	-2.41129	-3.17794	-2.60021	-2.6941	-2.00031	-1.87046	-2.62368	1	1	-2.38269
1376847_at	LOC690745	MOCO sulphurase C-terminal domain containing-like	-1.3351	1	1	1	1	1	-2.8167	-1.98846	-1.7675	-2.65599	-2.6375	-1.99596	-3.36779	-1.88358	-3.30558	-3.52009	-2.36269	-2.53232	-2.76167
1388038_at	Atrn	attractin	1	-1.22871	1	1	-1.31957	1	-2.59466	-1.84106	-2.00261	-2.15687	-2.21891	-1.59142	-3.70843	-1.69657	-3.10289	-2.94879	-3.42623	-2.12874	-3.44611
1382153_at	Clecsf6	C-type (calcium dependent, carbohydrate recognition domain) lectin, superfamily member 6	1	1	1	1	1	1	-2.95375	1	1	1	1	1	1	1	-3.59023	1	-5.76822	1	1
1380334_at	RGD1359713	hypothetical RNA binding protein RGD1359713	1	1	1	1	1	1	-1.90128	-1.75381	-1.72893	-1.53553	-1.48309	-1.30873	-2.40995	-1.81608	-2.61607	-3.25061	-2.68388	-3.25546	-3.27614
1392928_at	RGD1305721	similar to RIKEN cDNA 2810055F11	-1.58964	-1.60259	-1.60496	1	1	1	-2.10568	-1.96347	-1.90607	-2.82645	-4.97568	-2.50964	-2.98314	-2.5672	-2.74006	-3.4165	-6.27989	-4.8057	-4.09559
1379571_at	Pkp4	plakophilin 4	1	1	1	1	1	1	-2.5767	1	1	1	1	-2.60955	-3.30399	-2.87913	-1.86995	-4.58817	-2.86526	-2.60003	-4.25768
1373057_at	ProSAPiP1		1	1	1	1	1	1	1	1	1	-2.63366	1	1	1	-2.42477	1	1	1	1	1
1399112_at	Skiv2l	superkiller viralicidic activity 2-like	1	1	1	1	1	1	1	1	1	-3.75937	1	1	1	1	1	1	1	1	1
1379941_at	RGD1560364	similar to vacuolar protein sorting 13C protein	1	-1.91446	1	-1.71202	1	-2.21656	-1.99676	-1.89458	-1.71313	-3.04359	1	-2.76126	-1.68452	-1.85768	1	1	1	1	1
1377995_at	Itfg3	integrin alpha FG-GAP repeat containing 3	1	1	1	1	1	1	1	1	1	1	1	-3.11355	1	1	1	-4.3451	1	1	1
1372597_at	Mrpl14	mitochondrial ribosomal protein L14	1	1	1	1	1	1	1	1	1	1	-8.1947	-2.87113	1	-2.85222	-2.7597	1	1	-3.08308	1
1395236_at	Ppp1r3c	protein phosphatase 1, regulatory (inhibitor) subunit 3C	1	1	-2.15653	1	1	1	-1.93222	-2.06075	-2.32863	-2.52604	1	-3.14056	1	-2.21623	-2.85059	-2.20474	-3.25038	-3.01334	-2.31359
1383644_at	1383644_at		1	1	1	1	1	1	1	1	1	1	1	1	1	-3.92854	1	1	1	1	1
1395228_at	1395228_at		1	1	1	1	1	1	1	1	1	1	1	-5.27328	1	1	1	1	1	1	1
1391438_at	Ube2d2		1	1	1	-1.41842	-1.39272	-1.59398	1	1	1	-1.60286	-1.56999	-1.62407	-2.20609	-1.5934	-2.94616	-3.23711	-2.54519	-2.7587	-3.08486
1372091_at	Mid1ip1	MID1 interacting protein 1 (gastrulation specific G12 homolog (zebrafish))	1	1	-1.83671	1	1	1	1	1	1	1	1	-2.1961	1	-1.84437	-3.15601	-3.12494	-2.40248	-2.70696	-3.68506
1383122_at	Prkag2	protein kinase, AMP-activated, gamma 2 non-catalytic subunit	1	1	1	1	1	1	1	1	1	1	1	1	1	1	1	1	1	1	-4.37044
1390830_at	LOC499602	hypothetical protein LOC499602	1	1	1	1	1	1	1	1	1	1	1	1	1	1	-4.91994	-2.89844	-3.40675	1	-5.87341
1380004_at	Dci		1	1	1	1	1	1	1	1	1	1	1	-2.58994	1	1	1	1	1	-3.96654	1
1379027_at	Wwc1	WW, C2 and coiled-coil domain containing 1	1	-1.41859	1	-1.62557	1	1	-1.52577	-1.34862	-1.50628	-2.30265	-2.39136	-2.75229	-2.64874	-3.84913	-2.86645	-2.86572	-2.54588	-4.13055	-2.62673
1375813_at	Akap8l	A kinase (PRKA) anchor protein 8-like	1	1	1	1	1	1	-1.71932	-2.02222	1	-2.26861	1	-2.34157	-2.049	-1.88861	-2.13121	-1.91736	-2.15931	-3.51387	-2.54673
1383733_at	Ak3		1	-1.47399	1	1	1	1	-2.64534	-1.8551	-1.76404	-1.91097	-1.84997	-1.97207	-1.90865	-2.91649	-2.74339	-2.45164	-2.25049	-2.41961	-2.16143
1393149_at	Pcdha1	protocadherin alpha 1 /// protocadherin alpha 10 /// protocadherin alpha 11 /// protocadherin alpha 12 /// protocadherin alpha 13 /// protocadherin alpha 2 /// protocadherin alpha 3 /// protocadherin alpha 4 /// protocadherin alpha 5 /// protocadherin alpha 6 /// protocadherin alpha 7 /// protocadherin alpha 8 /// protocadherin alpha 9 /// protocadherin alpha subfamily C, 1 /// protocadherin alph…	1	1	1	1	1	1	-3.54843	1	1	1	1	1	1	1	1	1	1	-2.85054	-2.83279
1389682_at	LOC678702	ChaC, cation transport regulator homolog 2 (E. coli)	1	1	1	-1.64952	-1.63853	-1.42326	-1.65779	-1.76246	-1.49666	-2.58641	-2.84075	-3.19181	-2.38845	-2.15235	-2.66413	-2.80242	-1.46661	-2.62331	-3.35848
1393409_at	1393409_at		1	1	1	1	1	1	1	1	1	1	1	-3.22784	1	1	-3.8891	-3.16117	1	-6.14273	-2.96051
1395232_at	Iqwd1	IQ motif and WD repeats 1	1	1	1	1	1	1	1	1	1	1	1	1	1	1	-2.99632	-3.47148	-2.54383	-2.39079	-3.12035
1391483_at	Creb3l3	cAMP responsive element binding protein 3-like 3	1	1	1	1	1	1	-2.02801	-1.5215	-1.4077	-3.87919	-4.58692	-3.09838	-2.89074	-1.99133	-3.36643	-2.68559	-2.4163	-3.11835	-2.36814
1393221_at	RGD1564865	similar to 20-alpha-hydroxysteroid dehydrogenase	1	1	1	1	2.48659	1	1	1	1	1	1	1	1	-5.38658	1	-3.33073	-2.3291	-6.69038	-3.30182
1368925_a_at	Arhgef7	Rho guanine nucleotide exchange factor (GEF7)	1	1	1	1	1	1	1	1	1	1	1	1	1	1	1	1	1	-6.20754	-6.54955
1395983_at	Fam82a	Family with sequence similarity 82, member A	1	1	1	1	1	1	1	1	1	1	1	1	1	1	1	1	1	-7.82815	1
1395601_at	Nudt12	nudix (nucleoside diphosphate linked moiety X)-type motif 12	1	1	1	1	1	1	-1.92769	-2.0453	-2.01473	-3.67895	-5.15459	-3.35624	-3.34131	-2.50941	-2.86363	-3.89239	-3.23985	-3.49419	-6.48557
1378260_at	Adh1	alcohol dehydrogenase 1 (class I)	1	1	-1.48385	-1.64122	-1.44533	-1.44926	-3.13074	-3.7697	-2.15409	-3.3383	-4.39597	-3.76679	-5.19009	-2.04939	-3.95584	-3.97522	-4.53571	-3.71928	-5.79514
1387278_at	Ppara	peroxisome proliferator activated receptor alpha	1	1	1	1	1	1	1	1	-3.35373	-2.77286	1	-4.7624	1	1	1	1	1	-7.67931	1
1370950_at	Ppap2b	phosphatidic acid phosphatase type 2B	1	1	1	-1.35959	-1.2475	-1.47254	-2.44981	-1.74822	-2.3367	-3.02981	-3.7877	-3.05721	-3.20398	-2.03057	-3.83539	-3.28947	-3.74345	-3.87042	-3.93837
1367950_at	Slc22a5	solute carrier family 22 (organic cation transporter), member 5	-1.96991	1	1	1	1	1	-3.06484	-1.80502	-2.03287	-4.17736	-6.34497	-3.94054	-2.29219	-1.99534	-3.19908	-3.02039	-3.35483	-3.27091	-3.46075
1368294_at	Dnase1l3	deoxyribonuclease 1-like 3	1	1	1	-1.44209	1	1	-2.44105	-1.73131	-1.75813	-2.60438	-2.92902	-2.20574	-2.92093	-2.03675	-3.75947	-3.12109	-3.01349	-2.94748	-3.03001
1378457_at	1378457_at		1	-1.5166	1	-1.46847	1	-1.46589	-2.2279	-1.40996	-1.38782	-4.49316	-5.11531	-6.3734	-2.89625	-3.73851	-3.58005	-4.16522	-2.92309	-3.48469	-3.02867
1374143_at	Epha2	Eph receptor A2	1	1	1	1	1	1	1	-2.02463	1	1	1	1	1	-2.51994	-4.13825	-2.85258	-3.35467	-3.09911	-3.00839
1388531_at	Pgrmc2	progesterone receptor membrane component 2	1	1	1	1	-1.47354	1	-1.69732	1	1	-2.43944	-1.74231	-2.12653	-3.2856	-2.40531	-4.1292	-3.34242	-3.6509	-3.58676	-3.82468
1377810_at	Ralgps2	Ral GEF with PH domain and SH3 binding motif 2	1	1	1	1	1	1	-2.04206	1	-1.9017	-2.04378	1	-2.339	-4.20954	-2.22314	-3.58036	-3.44467	-3.32609	-3.89195	-4.1229
1393346_at	Ccdc125	coiled-coil domain containing 125	1	1	1	-2.55196	1	-2.97814	1	1	1	-4.12055	-2.90143	-2.32323	-3.83158	-2.9589	-2.80731	-3.23142	-3.87565	1	-4.52933
1390628_at	Cpeb2	cytoplasmic polyadenylation element binding protein 2	1	1	1	-1.57557	-1.55376	-2.15937	-1.59469	-1.57842	1	-2.21961	-3.85588	-2.2159	-2.29512	-2.88869	-4.12475	-6.82064	-4.35522	-2.98332	-3.56015
1370236_at	Ppt1	palmitoyl-protein thioesterase 1	1	1	1	1	1	1	-3.60367	1	1	1	-4.26266	1	1	1	-6.23605	-2.82041	-3.65989	-3.21405	-7.14515
1369761_at	Pou1f1	POU class 1 homeobox 1	1	1	1	1	1	1	1	1	1	1	1	1	1	1	1	1	1	1	-4.87684
1388274_at	Bmyc	brain expressed myelocytomatosis oncogene	1	1	1	1	1	1	1	1	1	1	1	1	1	1	1	1	1	1	-6.17446
1369149_at	Limk1	LIM domain kinase 1	1	1	1	1	1	1	1	1	1	1	1	1	1	1	1	1	1	1	-8.5531
1374968_at	Eif2c1	eukaryotic translation initiation factor 2C, 1	1	1	1	1	1	1	1	1	1	1	1	-3.78273	1	1	-4.29733	-3.97363	-2.78505	-2.76469	-5.78719
1370916_at	Tec	cytoplasmic tyrosine kinase, Dscr28C related (Drosophila)	1	1	1	1	1	1	1	1	1	1	1	-2.03431	-3.29024	1	-4.38464	-3.82888	-3.78114	-2.93243	-3.05132
1369647_at	Calcrl	calcitonin receptor-like	1	1	1	1	1	1	1	1	1	1	1	1	1	1	-3.74929	-3.35566	-3.41454	1	-5.51674
1378048_at	LOC679869	similar to Transcription factor 7-like 2 (HMG box transcription factor 4) (T-cell-specific transcription factor 4) (TCF-4) (hTCF-4)	1	1	1	1	1	1	1	1	1	1	1	1	1	1	-3.40251	1	-3.6923	1	1
1372567_at	R3hcc1	R3H domain and coiled-coil containing 1	1	1	1	1	1	1	1	1	1	-8.31551	1	-6.69623	1	1	-3.38841	-3.35954	-3.63726	1	1
1386063_at	Dyrk2	dual-specificity tyrosine-(Y)-phosphorylation regulated kinase 2	1	1	1	1	1	1	1	1	-1.92287	-2.37256	1	-3.14504	1	-2.11653	1	-3.51325	-3.29723	-3.71628	-6.03806
1384437_at	Smarca1	SWI/SNF related, matrix associated, actin dependent regulator of chromatin, subfamily a, member 1	1	1	1	1	1	1	1	1	1	1	1	1	1	1	1	1	-4.41429	-3.753	1
1387643_at	Fgf21	fibroblast growth factor 21	1	1	1	1	1	1	1	1	1	1	-8.66026	1	-4.7915	-6.96714	-3.64027	-4.24325	-3.58812	-5.8863	-3.7452
1383353_at	1383353_at		1	1	1	-2.65871	1	1	1	1	1	1	1	1	1	-3.37881	-18.2567	-8.85199	-5.62305	-3.58377	-7.57742
1389377_at	Insig2	insulin induced gene 2	1	1	1	1	-1.28822	-1.42236	-2.69147	-1.92118	-2.81941	-1.35968	-1.67435	-2.46984	-4.56675	-3.66948	-5.30263	-9.08666	-3.79269	-6.71509	-3.63094
1393690_at	Insig2	insulin induced gene 2	1	1	1	1	-1.38074	-1.26919	-1.71442	-1.90096	-1.68149	-1.3404	-1.62065	-2.35825	-5.25384	-3.9431	-4.98632	-9.23912	-4.14954	-7.45361	-3.89629
1386944_a_at	G6pc	glucose-6-phosphatase, catalytic	1	1.48009	1.34118	1	1	1	-5.40998	-1.29687	-2.77458	1	1	1	-1.95282	1	-9.97297	-9.36613	-1.90408	-3.03538	-2.93206
1379427_at	Pgrmc2	progesterone receptor membrane component 2	1	1	1	1	1	1	1	1	1	-1.60072	1	1	-2.82185	-1.75639	-4.30443	-4.30012	-4.49292	-4.8806	-3.18146
1385582_at	Osbpl2	oxysterol binding protein-like 2	1	1	1	1	1	1	1	1	1	1	1	1	1	1	-4.44901	-4.17053	-3.98663	1	1
1390711_at	Hn1		1	1	1	1	1	1	-4.72834	1	1	1	1	1	1	1	-5.45908	1	-5.27942	1	1
1379084_at	Wdr22	WD repeat domain 22	1	1	1	1	1	1	1	1	1	1	1	1	1	1	1	-6.62881	1	1	1
1370951_at	Ppap2b	phosphatidic acid phosphatase type 2B	1	-3.46598	-2.3065	-4.36424	1	-5.05597	-8.1459	1	-12.2032	-19.0007	-3.86436	-25.7635	-4.7161	-8.74156	-49.6325	-13.8955	-18.2827	-12.6998	-10.1059
1368458_at	Cyp7a1	cytochrome P450, family 7, subfamily a, polypeptide 1	-3.16308	1	-6.17469	-3.32808	1	-2.01502	-11.4365	-6.50077	-6.93037	-14.882	-11.9557	-19.5167	-3.94799	-1.97261	-45.6664	-51.0116	-45.6124	-100	-48.3704
1377679_at	Gpr125	G protein-coupled receptor 125	1	1	1	1	1	1	1	1	1	-9.44096	-8.97559	-10.4124	1	1	-17.7056	-16.5653	-5.62511	-12.5116	-13.2761
1374019_at	RGD1564379	RGD1564379	1	1	1	1	1	1	1	1	1	-32.0706	-19.7582	-29.925	-3.12101	-3.45181	-21.4613	-13.295	1	-10.0365	-17.4201
1373963_at	Hdhd3	haloacid dehalogenase-like hydrolase domain containing 3	-3.29323	-2.7059	-2.84956	-3.20818	-2.64309	-2.40936	-2.30813	-2.51351	1	-50.2997	-16.2852	-65.6302	-8.18644	-6.49338	-14.2239	-10.3539	-5.92835	-12.1891	-12.3433
1391730_at	Mll2_predicted		1	1	-2.43078	1	1	1	-4.59674	1	1	-39.0228	-23.58	-37.7632	1	-3.60352	-11.8963	-12.6804	-18.167	-3.37194	-14.8926
1383947_at	1383947_at		1	-6.63413	1	1	1	1	1	1	1	-7.92016	1	-7.82319	1	1	1	1	1	1	1
1376226_at	Acat2		-6.98103	-2.77202	-5.35704	-5.2543	-2.96949	-3.2683	-7.15381	1	-3.32303	-5.63565	1	-5.6103	-8.48745	-12.3572	-6.78487	-7.13938	1	-5.51258	1
1372030_at	Zfyve21	zinc finger, FYVE domain containing 21	-5.47241	-10.3854	-9.45164	1	1	-4.00315	1	-1.93263	-2.2631	-16.9967	-9.85839	-50.1459	-8.15054	-11.3843	-4.60445	-5.26093	-5.39813	-5.94909	-5.90384
1370074_at	Baiap2	brain-specific angiogenesis inhibitor 1-associated protein 2	1	1	1	1	1	1	1	1	1	-9.96773	1	-9.47312	1	1	1	-9.99387	1	-8.56572	-8.5078
1378828_at	1378828_at		-3.55691	-1.69773	-2.24928	-1.83132	1	-2.84653	-2.96492	1	-2.08507	-8.16278	-10.8619	-9.18954	-2.81518	1	-6.80802	-5.62626	-6.67259	-6.4298	-7.7142
1387252_at	Sec14l2	SEC14-like 2 (S. cerevisiae)	-2.50298	1	-2.6724	1	1	1	1	1	1	-13.579	-26.9969	-10.1129	-5.43853	-3.08047	-11.2307	-5.63958	-6.51085	-5.51827	-5.83082
1383826_at	Rab40b	Rab40b, member RAS oncogene family	-2.65327	-3.80322	-3.45771	1	1	-1.92116	-4.94889	-2.55279	-2.56757	-15.3115	-5.33537	-13.6738	-2.98993	-11.21	-6.21438	-7.49463	-9.72084	-14.594	-14.244
1373736_at	1373736_at		1	1	1	1	1	-7.81232	-7.1748	1	1	-8.27466	1	-8.50324	1	1	-9.99724	-8.71614	1	1	-7.78679
1397263_at	Adh6		-2.30022	1	1	-3.06163	-2.37283	-3.52203	-3.52347	-3.49448	-3.67496	-7.99831	-18.7088	-6.34176	-6.49728	-6.11153	-7.19008	-7.29502	-6.70712	-7.87824	-5.74614
1391414_at	LOC679811	similar to RIKEN cDNA D930015E06	1	1	1	1	1	1	1	1	1	1	1	1	1	1	-32.9085	-10.8767	-8.09865	-18.7707	-7.15735
1386975_at	Pdk2	pyruvate dehydrogenase kinase, isoenzyme 2	1	1	-3.49138	1	1	1	-18.084	-5.26425	-4.68615	-34.3728	1	-31.3457	-5.06558	-27.2358	-6.66965	-9.14229	-7.20882	-27.4269	-16.8494
1390923_a_at	Osbpl1a	oxysterol binding protein-like 1A	1	1	1	1	1	1	-8.68106	-7.30815	-5.15195	-16.3951	-7.79352	-21.4656	-4.19007	-5.84893	-7.24769	-8.58322	-19.6968	-10.8561	-18.4077
1367892_at	Pdk2	pyruvate dehydrogenase kinase, isoenzyme 2	1	1	-1.80929	1	1	1	-2.92964	-2.1409	-2.28433	-27.6261	-86.1351	-100	1	-5.40608	-11.828	-9.46175	-8.49829	-8.79739	-31.3626
1388778_at	1388778_at		-3.01275	-1.72006	-1.75879	-1.30771	1	-1.98836	-2.94473	-2.77515	-2.33617	-10.0531	-7.10223	-23.0836	-5.6414	-5.45689	-14.0154	-61.1263	-8.75739	-24.3107	-17.9354
1393831_at	Agphd1		-2.64102	-1.72626	-1.96132	1	-1.66075	-2.18588	-4.62697	-3.63478	-2.79418	-15.6739	-16.7108	-12.8833	-5.46762	-3.22573	-10.4155	-27.7818	-21.77	-14.8945	-24.9404
1390412_at	Slc40a1	solute carrier family 39 (iron-regulated transporter), member 1	1	1	-1.4898	-1.44495	1	1	-3.98561	-3.68336	-3.31333	-8.34272	-20.2146	-12.0967	-5.15614	-3.00764	-5.90793	-12.353	-8.16687	-7.97394	-12.6004
1374241_at	1374241_at		1	1	1	1	1	1	-3.98592	-4.84942	-2.33769	-8.82545	-8.2899	-9.84032	-4.74518	-3.54911	-8.09462	-6.84648	-6.90126	-8.69052	-7.26788
1371824_at	Ak3l1	adenylate kinase 3 alpha-like 1	-1.47566	-1.66525	-1.45936	1	1	1	-2.65846	-3.98977	-2.56805	-9.22827	-12.8204	-13.8401	-5.7882	-8.16151	-9.11572	-12.5213	-7.56306	-14.1224	-7.46861
1380865_at	1380865_at		1	-1.25279	1	1	1	-1.21014	-5.65785	-3.23786	-3.13386	-22.8746	-27.5472	-8.9331	-13.1936	-13.0667	-10.3756	-10.118	-6.44344	-6.18476	-5.95531
1390375_at	Akap8l	A kinase (PRKA) anchor protein 8-like	1	1	1	1	1	-2.72732	1	1	1	-14.7749	1	-7.02443	-4.2654	-4.52629	-6.1991	-8.2226	-4.85018	-16.2153	-4.38134
1392921_at	Ppm1k	Protein phosphatase 1K (PP2C domain containing)	-2.34131	1	1	1	1	1	-3.64182	-3.34816	-2.65067	-11.9602	1	-6.82584	-5.67155	-5.92621	-9.73149	-9.78162	1	-8.97541	-6.54626
1387561_at	Vipr1	vasoactive intestinal peptide receptor 1	1	1	1	1	1	1	-6.11652	1	1	-4.228	1	-8.25079	-11.0938	-6.331	-11.1594	-12.2035	1	-9.14027	-9.39854
1382358_at	Abcc9		1	1	1	1	1	1	-5.79425	1	-2.86356	-12.7054	1	-14.6983	-9.61975	-4.25295	-8.26271	-16.1279	-5.37055	-10.6142	-8.98814
1375249_at	Eif2c1	eukaryotic translation initiation factor 2C, 1	1	1	1	-3.66639	1	1	1	1	1	-5.28148	-8.44744	-3.8922	-4.68468	1	-8.93447	-10.9096	-14.0829	-4.39666	-18.2716
1388395_at	G0s2	G0/G1 switch gene 2	1	-3.62235	-2.29601	1	-1.59304	-1.59204	-2.60287	-2.44525	-2.61466	-3.61259	-8.67348	-10.1683	-7.52096	-6.4507	-27.4272	-44.0164	-26.7575	-59.822	-41.7418
1368305_at	Casp6	caspase 6	1	-2.51185	-4.02519	1	1	1	-2.13042	-2.17272	-1.74525	-4.13683	-6.57606	-6.59039	-6.25915	-4.42689	-6.10271	-14.2034	-5.28686	-6.96556	-7.22473
1380351_at	Sugt1		1	-2.68046	-2.39571	1	1	1	-4.36632	-4.02254	-2.65655	-16.8303	-9.52267	-16.1403	-9.03034	-9.00766	-10.8376	-7.97067	-13.3127	-4.91135	-12.7863
1377155_at	RGD1563507_predicted		-1.88321	-2.83182	-2.76546	1	1	1	-2.70849	-2.16856	-1.69981	-8.19649	-20.7232	-18.5038	-5.35197	-4.45373	-8.28506	-5.72679	-6.25238	-3.69748	-6.80396
1371899_at	Prkra	protein kinase, interferon inducible double stranded RNA dependent activator	1	1	1	1	1	1	-7.21306	1	1	-14.9988	-8.06983	-9.40406	1	-7.49341	-7.16526	-4.59998	-5.41152	-4.16692	-7.29603
1384341_at	Faah	fatty acid amide hydrolase	1	1	1	1	1	1	1	1	1	1	1	1	1	1	-8.6338	-8.17039	-9.03102	1	-10.7122
1377014_at	RGD1308116	similar to hypothetical protein MGC42105	1	1	1	1	1	1	-11.0536	-8.49045	1	-16.4343	-9.65745	-15.0165	1	1	-18.4223	-12.5377	-5.7042	-10.6137	-22.579
1380905_at	Glyat		1	1	-1.54256	-1.55142	-1.31189	-1.5027	-9.92294	-5.70532	-5.22416	-11.632	-15.6928	-11.259	-10.7174	-8.98886	-11.2018	-5.73607	-4.99378	-5.41997	-8.2744
1394939_at	Ppm1k	protein phosphatase 1K (PP2C domain containing)	1	1	1	1	1	1	-4.79192	-5.0601	-2.82089	-5.51656	-11.9428	-8.67958	-7.3916	-3.86529	-8.57174	-9.49655	-4.23275	-8.1335	-7.91196
1391652_at	Glyat	glycine-N-acyltransferase	1	1	1	-1.48184	1	1	-5.97208	-6.30063	-4.91221	-5.91828	-4.8437	-6.18353	-7.53173	-6.09661	-6.11594	-5.47203	-4.37273	-3.14337	-10.0273
1374419_at	Adcy9_predicted		1	1	1	-3.28873	1	1	1	1	1	-16.4709	-9.42275	-9.79716	1	-5.44311	-11.0401	-39.4364	-10.7161	-8.4589	-8.40818
1387658_at	Eef2k	eukaryotic elongation factor-2 kinase	1	1	1	1	1	1	1	1	1	-5.92963	1	1	1	1	-13.6453	-14.4484	-6.17253	-9.91749	-6.57125
1381591_at	MGC94145		1	1	1	1	1	1	-9.72276	-10.8876	1	1	1	1	1	1	-17.0325	1	-17.2221	-12.5363	1
1391781_at	Blvrb_predicted		1	-2.45656	-2.36147	1	1	-2.22434	1	1	1	-5.71417	-4.3886	-5.53334	-2.2094	-2.2234	-7.2874	-9.57273	-5.90638	-11.2081	-4.53173
1372832_at	Epim		-2.12868	-3.13764	-2.97448	1	1	1	1	1	1	-11.9527	-6.30908	-9.16857	-3.84191	-2.37376	-5.91675	-6.45507	-3.47648	-5.09891	-7.81544
1378146_at	Tbc1d24	TBC1 domain family, member 24	1	-2.03627	-1.66015	1	1	1	1	1	-1.62518	-9.01871	-7.96322	-8.17685	-3.02755	-2.42606	-6.16219	-8.09286	-4.21779	-6.35456	-6.22375
1368574_at	Adra1b	adrenergic receptor, alpha 1b	-1.35043	-2.23405	-1.82631	1	1	1	-1.9608	-1.46387	-1.3723	-6.93205	-7.84924	-7.10141	-3.46667	-2.65112	-6.90116	-11.5627	-7.11567	-3.20368	-5.27108
1393516_at	1393516_at		-1.46235	-1.72716	-1.76864	1	1	1	-1.79351	-2.3961	-1.4967	-4.57915	-3.97967	-3.95638	-3.23798	-2.91053	-6.40639	-5.53174	-4.71583	-5.53164	-7.30838
1374308_at	Sec14l2	SEC14-like 2 (S. cerevisiae)	-2.07249	-1.81406	-2.16914	1	1	-1.37472	-2.01301	-1.59389	-1.68742	-14.7783	-6.4238	-7.9016	-5.44534	-3.09824	-5.02955	-5.26888	-4.66443	-5.06739	-6.64807
1374478_at	RGD1305347	similar to RIKEN cDNA 2610528J11	-1.67983	-1.49311	-1.52705	-1.47894	-1.75565	-1.47745	-1.5772	1	-1.48497	-3.10191	-3.77639	-7.08621	-4.03289	-2.7405	-3.93394	-5.6118	-7.5264	-4.71313	-5.63666
1389161_at	1389161_at		-1.35192	1	1	-1.32352	-1.43914	-1.33271	-2.1635	-1.80416	-1.41386	-4.47446	-7.80508	-5.5278	-3.46939	-2.2388	-7.50784	-5.61281	-6.39873	-6.45812	-8.8861
1367932_at	Hmgcs1	3-hydroxy-3-methylglutaryl-Coenzyme A synthase 1	1	1	-2.10087	1	1	1	-1.57351	-2.12256	1	-4.14326	-4.5391	-5.78514	-3.32409	-2.80447	-6.62721	-8.86379	-7.29041	-4.40277	-10.3508
1377966_at	1377966_at		-1.70145	-2.09956	-1.81578	1	-1.8243	-1.535	-2.17102	-1.49785	-1.57059	-6.92931	-6.80497	-7.07454	-3.23427	-2.68814	-9.89721	-10.7634	-8.06069	-11.5891	-9.44404
1384971_at	Depdc7	DEP domain containing 7	-1.27861	-1.52264	-1.48938	-1.67451	-1.30136	-1.52132	-1.47328	-1.39991	1	-7.82487	-10.3394	-8.6148	-2.80839	-1.77367	-18.3436	-18.2509	-10.0011	-11.6874	-17.1156
1393612_a_at	Depdc7	DEP domain containing 7	1	-1.50181	-1.50104	-1.84677	-1.28251	-1.59061	-1.3655	1	1	-6.33384	-7.68999	-7.66298	-2.92127	-2.05779	-10.7133	-19.2729	-8.03149	-10.7342	-11.2887
1380894_at	Lilrc1	leukocyte immunoglobulin-like receptor	1	1	1	1	1	1	-3.34072	-4.97343	-4.33698	1	1	-3.92724	-5.87346	-3.5957	-7.60481	-14.0135	1	-6.11747	-6.1
1369863_at	Adh4	alcohol dehydrogenase 4 (class II), pi polypeptide	-1.58962	1	1	-2.42461	-1.93588	-1.98571	-4.86077	-3.42027	-2.70749	-5.82649	-6.55486	-3.04783	-8.21542	-5.30729	-8.08258	-6.67854	-4.60624	-4.42083	-5.09984
1391145_at	1391145_at		1	1	1	1	1	1	1	1	1	1	1	1	1	1	1	-7.99186	1	1	-5.83437
1386641_at	1386641_at		1	1	1	1	1	1	-3.35456	-1.80679	1	-8.07762	-9.44664	-6.74199	-4.39818	-6.13447	-5.29019	-8.14801	-6.16097	-10.9773	-5.51217
1383469_at	Aldh1a3	aldehyde dehydrogenase family 1, subfamily A3	1	1	1	1	1	1	1	1	1	1	1	1	1	1	-4.26972	-5.45227	1	-7.3693	-13.3017
1388831_at	Slc9a3r2	solute carrier family 9 (sodium/hydrogen exchanger), member 3 regulator 2	1	1	1	1	1	1	1	1	1	-14.2138	1	-4.58106	-3.05504	1	-10.7787	-9.11652	-18.7589	-25.3455	-5.85434
1385713_at	Akap8l	A kinase (PRKA) anchor protein 8-like	1	-1.35546	1	1	1	-1.82328	-2.50416	-1.65737	-1.50014	-4.72685	-4.7722	-4.94438	-2.69009	-2.37144	-12.7285	-15.5458	-48.9275	-10.9944	-6.62018
1383573_at	Tshz1	teashirt zinc finger family member 1	1	1	1	1	1	1	-2.98898	1	1	-4.3448	-12.2377	-5.04407	-3.0357	-4.30708	-12.1169	-18.068	-27.1137	-19.0927	-17.556
1389553_at	Clec4a3	C-type lectin domain family 4, member a3	1	-2.47205	1	-2.16898	1	-1.79691	-2.78542	1	-2.07488	-4.80124	-4.691	-3.93979	-2.67372	-2.28125	-9.17212	-24.49	-10.2387	-18.6961	-18.204
1387874_at	Dbp	D site albumin promoter binding protein	1	1	1	1	1	1	1	1	1	1	1	-3.64103	1	1	-7.64374	-8.79295	-7.71517	-7.87348	-8.23154
1382398_at	Shisa3	shisa homolog 3 (Xenopus laevis)	1	1	1	-4.03864	1	-4.91814	1	1	1	-9.49812	1	1	-3.70497	-5.37944	-10.5595	-7.48048	1	-3.4314	-3.50979
1376089_at	Ldlr		1	-1.77851	-1.8806	-2.06643	1	-2.37809	1	1	-1.62846	-6.67076	-2.88223	-5.39463	-2.55812	-3.66905	-16.9808	-37.6534	-17.3849	-23.0185	-19.6439
1393684_at	Hells	helicase, lymphoid specific	1	-1.90076	-2.32466	-3.12017	-1.88466	-3.17452	-1.52762	-1.49652	1	-9.91685	-17.1465	-10.2136	-3.46997	-2.80604	-12.4756	-8.27614	-7.30274	-10.6608	-13.5567
1374947_at	Bcar3	breast cancer anti-estrogen resistance 3	1	-2.05168	1	1	1	1	1	1	1	-5.44523	-5.53467	-4.17463	-2.20728	-2.21981	-11.5439	-10.8208	-24.3441	-5.77335	-26.3648
1377725_at	Anp32a		1	1	1	1	1	-3.26998	1	1	1	-4.88191	1	-17.7754	1	-3.61015	-27.8539	-31.009	-9.26556	-16.1992	-22.8
1368376_at	Nr0b2	nuclear receptor subfamily 0, group B, member 2	-2.20246	1	-2.36084	-3.44085	-4.33348	-1.9549	1	1	-1.91233	-2.6712	1	-4.67483	-3.43998	-3.05689	-11.2171	-6.77596	-6.75899	-7.01547	-7.53223
1374604_at	Mfsd9	major facilitator superfamily domain containing 9	1	1	1	1	1	1	1	1	1	-9.41319	-5.83959	-7.8151	-8.0099	1	-17.3021	-4.9766	1	1	-4.15324
1369325_at	Lyst	lysosomal trafficking regulator	1	1	1	1	1	1	1	1	1	-5.72793	1	-5.24983	1	1	-15.045	-7.68227	-3.97867	-6.33168	-10.862
1389448_at	40425	septin 4	1	1	1	1	1	1	-3.30472	1	1	-4.49398	1	-5.75262	1	-2.79181	-8.30378	-9.0035	-6.46633	-7.45064	-12.4575
1378565_at	LOC366300	hypothetical LOC366300	1	1	1	1	1	1	-2.74246	-1.61719	-1.64816	-4.89686	-2.96441	-4.52497	1	-3.08369	-5.35741	-4.5348	-4.24801	-2.85892	-5.88535
1372098_at	Tmem141	transmembrane protein 141	1	1	1	1	1	1	1	1	1	-5.31522	-8.65614	-8.2604	1	-2.97615	-4.48035	-7.79396	-4.16829	-4.20171	-7.11053
1368133_at	Mpdz	multiple PDZ domain protein	1	-2.0686	-1.45463	1	1	1	-2.41461	-1.65993	-1.69486	-5.74158	-3.5824	-5.95365	-1.42154	-2.93286	-8.19451	-5.77449	-5.36029	-5.78389	-6.52665
1373740_at	1373740_at		1	1	1	1	1	1	1	1	1	-7.07967	-8.40718	-13.0288	1	1	-4.32676	-6.754	-6.82964	-4.2567	-3.98693
1388812_at	Tp53i13	transformation related protein 53 inducible protein 13	1	1	1	1	1	1	1	1	1	1	1	1	1	1	-5.39185	-7.30824	-17.4999	-4.85986	-3.09577
1371694_at	Dpysl2	dihydropyrimidinase-like 2	1	1	-1.80002	-2.00686	1	-2.04412	1	1	1	-2.35616	-2.7339	-3.74819	1.91946	-2.23029	-5.08444	-6.05035	-4.04172	-2.57922	-4.25908
1392968_at	1392968_at		1	1	1	1	1	1	1	1	1	1	1	1	4.97262	1	1	1	1	1	1
1374530_at	Fzd7	frizzled homolog 7 (Drosophila)	1	1	1	1	1	1	-2.11299	1	1	-2.22446	1	-2.75656	1	1	-4.78366	-3.53809	-3.94518	1	-7.35907
1372736_at	Agl	amylo-1,6-glucosidase, 4-alpha-glucanotransferase	1	-1.45934	-1.38994	-1.30346	1	-1.33487	-1.66288	-1.44515	-1.28983	-3.44226	-5.56758	-3.69478	2.28603	-1.94303	-4.58265	-4.24079	-4.79251	-3.88513	-5.03403
1369638_at	Eef2k	eukaryotic elongation factor-2 kinase	1	1	1	1	1	1	1	1	1	-3.75206	1	-2.95856	1	1	-10.1798	-5.54981	1	1	-8.08477
1383283_at	Ocrl	oculocerebrorenal syndrome of Lowe	1	1	1	1	1	1	1	1	1	-3.57483	1	-5.57011	1	1	-5.31515	-5.00536	1	1	1
1392893_a_at	1392893_a_at		1	1	-1.9061	1	1	1	1	1	1	-5.696	-4.29338	-4.84267	-1.69701	-2.42832	-4.20924	-5.13686	-3.18638	-4.1255	-3.70331
1388579_at	Slc25a42	solute carrier family 25, member 42	-2.95114	-2.60853	1	1	1	1	1	1	1	-4.61599	1	-7.2732	1	-2.51323	-6.02709	-6.20344	-7.97002	-7.25178	-4.58408
1371635_at	Gpr175	G protein-coupled receptor 175	1	1	1	1	1	1	1	1	1	-6.32267	1	-7.18212	1	1	-12.5872	-5.78196	-6.95668	-6.60581	-12.9611
1387941_s_at	Pla2g6	phospholipase A2, group VI	1	1	1	1	1	1	1	1	1	1	1	1	1	1	-8.95291	-8.70316	1	1	1
1377526_at	Snx27	sorting nexin family member 27	1	1	1	1	1	1	1	1	1	1	1	-5.12067	1	1	1	1	1	1	1
1395371_at	Suds3	suppressor of defective silencing 3 homolog (S. cerevisiae)	1	1	1	1	1	1	1	1	1	1	1	-6.03976	1	1	1	1	1	1	1
1391429_at	Hfe2	hemochromatosis type 2 (juvenile) (human homolog)	1	1	1	1	-1.58684	-1.56336	-1.45831	-1.38562	-1.43239	-6.18093	-7.87851	-6.46696	1.53952	-1.86893	-25.0321	-31.3932	-40.2723	-35.3847	-19.3502
1372452_at	Gpam		1	1	-1.74472	1	1	1	1	1	1	-3.75811	-5.36792	-5.20573	-1.49044	-3.90661	-25.9188	-36.2345	-24.891	-100	-24.2838
1371886_at	Crat	carnitine acetyltransferase	1	1	1	1	1	1	1	1	1	-18.0948	-30.5811	-14.9798	2.29234	-2.49724	-39.1304	-25.9623	-25.569	-18.0523	-18.1718
1388848_at	RGD1308350	similar to hypothetical protein MGC13251	1	1	1	1	1	1	1	1	1	1	1	1	1	1	1	-9.21871	1	1	1
1382783_at	Blm	Bloom syndrome homolog (human)	1	1	1	1	1	1	1	1	1	1	1	1	1	1	-6.3138	-8.05791	1	1	-5.84631
1374200_at	Slc29a3	solute carrier family 29 (nucleoside transporters), member 3	1	1	1	1	1	1	1	1	1	1	1	1	1	1	-12.3958	-7.00792	-11.6808	-10.7732	-10.7564
1373260_at	1373260_at		1	1	-2.86769	1	1	1	1	1	1	-6.24084	1	-10.6187	1	1	-10.2272	-6.87191	-5.91361	1	-4.8826
1388712_at	Cyth3	pleckstrin homology, Sec7 and coiled-coil domains 3	1	1	1	1	1	1	1	1	1	1	1	1	1	1	-10.8718	1	-9.25808	-8.5139	1
1383138_at	Ssh3	slingshot homolog 3 (Drosophila)	1	1	1	1	1	1	1	1	1	1	1	1	1	1	-6.2573	-4.4189	1	-11.5573	1
1372756_at	Map4k2	mitogen activated protein kinase kinase kinase kinase 2	1	1	1	1	1	1	1	1	1	1	1	1	1	1	-10.5356	1	1	-7.94246	1
1392072_at	Ddt		-1.74795	-1.82983	1	1	1	1	1	1	1	-9.22485	-6.48198	-14.502	-2.02581	-2.29391	-6.47783	-8.18591	-9.60162	-3.76105	-6.69376
1384273_at	Shpk	sedoheptulokinase	1	-1.63462	-1.78114	1	1	1	1	1	1	-4.23194	-3.22773	-8.48343	-2.46633	-1.99873	-6.46216	-7.95053	-6.81736	-4.44373	-10.6831
1379274_at	1379274_at		1	-1.53862	-1.47445	1	1	1	-2.04936	-1.79747	1	-8.44236	-13.6161	-12.0817	-5.00412	-4.25607	-6.39835	-6.4042	-5.09283	-2.93317	-5.30816
1369664_at	Avpr1a	arginine vasopressin receptor 1A	1	-1.92775	-1.84621	-1.26801	1	1	-2.72894	1	-1.82581	-5.77555	-4.93681	-3.551	-2.38585	-1.21025	-11.3089	-10.7352	-8.63664	-10.9815	-9.14555
1392825_at	RGD1559600	RGD1559600	1	1	-1.60246	1	1	1	1	1	1	-3.45582	-3.57732	-9.86257	-1.79535	1	-18.9591	-56.0953	-45.3494	-14.2713	-19.8224
1372676_at	Fahd1	fumarylacetoacetate hydrolase domain containing 1	1	1	1	1	1	1	1	1	1	-3.1863	-6.13296	-4.11135	-2.8512	1	-9.19462	-9.89901	-11.3497	-10.2498	-12.1393
1374287_at	Pald	paladin	-1.76654	-1.53861	-1.80624	1	1	1	-1.48186	-1.48778	-1.4619	-4.5853	-5.28712	-4.73117	-2.20281	-1.44934	-9.51632	-7.59687	-7.04597	-10.3725	-8.34342
1384720_at	1384720_at		-1.72129	-1.5834	-1.76069	1	-1.59569	1	1	1	1	-5.3961	-4.22914	-4.19596	-2.28276	1	-9.98338	-9.55972	-9.26555	-6.26531	-10.636
1367745_at	Dgkz	diacylglycerol kinase zeta	1	1	1	1	1	1	1	1	1	-3.37846	-4.40354	-6.66158	-3.2253	-2.73246	-4.85363	-5.70154	-4.06016	-6.5482	-6.76866
1382244_at	Qprt	Quinolinate phosphoribosyltransferase	1	1	1	1	1	1	1	1	1	-4.40979	1	1	1	1	-5.97779	-5.66927	-3.92814	-16.2474	-7.96795
1373240_at	Dhrs3	dehydrogenase/reductase (SDR family) member 3	-1.48358	-1.41711	-1.52244	-1.39024	-1.34604	-1.37639	-1.51275	-1.21361	1	-3.31786	-3.03867	-2.72645	-2.70068	-1.96516	-7.23423	-8.2994	-6.23307	-6.37758	-6.84835
1390155_at	Abhd6	abhydrolase domain containing 6	1	1	1	1	1	1	1	1	1	-5.85425	-15.6145	-4.4999	-3.09264	-2.50702	-9.97146	-4.9636	-4.74159	-5.3384	-9.07234
1377640_at	Calcrl		1	1	1	-2.02768	-1.36712	-1.56925	-2.21531	-1.59231	-1.49304	-3.54943	-4.06112	-3.87768	-2.9752	-2.17848	-5.70125	-4.61872	-3.78579	-4.33475	-7.54032
1395967_at	Ldlrap1	low density lipoprotein receptor adaptor protein 1	1	1	1	1	1	1	1	1	1	-6.8854	1	1	1	1	-3.70377	1	1	-9.72065	-4.37803
1390050_at	LOC680692	similar to Golgi phosphoprotein 2 (Golgi membrane protein GP73) /// similar to Golgi phosphoprotein 2 (Golgi membrane protein GP73)	1	1	1	1	1	1	-1.85895	1	1	-4.81441	-6.34078	-5.67599	-4.95137	-2.45317	-3.68911	-8.00026	-4.03401	-4.36791	-6.44315
1390164_at	1390164_at		1	1	1	1	1	1	-1.95044	-1.87738	-1.89261	-3.71461	-4.01124	-3.23995	-3.11082	-2.05511	-3.85655	-5.74134	-3.52709	-6.87694	-5.24115
1394960_at	Sdr42e1	NAD(P) dependent steroid dehydrogenase-like	1	1	1	1	1	1	-1.66294	-1.44207	-1.35198	-4.2298	-7.59633	-5.01629	-3.49051	-2.09962	-5.614	-6.32258	-6.28528	-8.52757	-4.78719
1380045_at	Pdp2	pyruvate dehydrogenase phosphatase isoenzyme 2	1	1	1	1	1	1	1	1	1	-4.68403	-6.07949	-4.6688	1	-2.7586	-7.76573	-8.01958	-7.90572	-8.62152	-4.39656
1390283_at	Tcf3	transcription factor 3	1	1	1	1	1	1	1	1	1	1	-4.38483	-4.07134	1	-3.3969	-5.04538	-5.19564	-5.30521	-4.4388	-2.91409
1390607_at	Zdhhc23	zinc finger, DHHC domain containing 23	1	1	1	1	1	1	1	1	1	-5.86994	1	-4.4979	1	1	-5.82756	-6.1631	-5.22214	-4.83562	-4.17437
1383593_at	Tmem56		1	-1.56751	1	1	1	1	-1.83201	-1.79372	-1.44291	-4.06925	-2.6909	-4.81199	-2.58548	-2.05621	-4.79962	-4.98044	-5.47266	-6.43307	-5.15287
1394079_at	Tbl1xr1	transducin (beta)-like 1X-linked receptor 1	1	1	1	1	1	1	1	1	1	-3.12324	-3.70718	-4.01249	-2.00668	-1.94737	-3.32214	-6.59168	-5.85033	-7.20188	-5.33075
1367839_at	Fdft1	farnesyl diphosphate farnesyl transferase 1	-1.89776	-1.99208	-1.56099	-1.80826	-1.38957	-1.4129	-1.6765	-1.29671	-1.58741	-2.69383	-5.04094	-3.21438	-1.86975	-2.2118	-6.1223	-7.46327	-7.48457	-3.6412	-5.51753
1395404_at	Fn3krp	fructosamine-3-kinase-related protein	1	-1.70566	-1.72122	1	1	1	1	-1.93035	1	-3.12819	-2.49854	-3.91505	-2.24702	-2.28307	-3.62365	-5.9622	-6.45436	-3.23111	-7.26634
1376313_at	Tpcn2	two pore segment channel 2	1	1	1	1	1	1	1	1	1	1	1	1	1	1	-3.93057	-4.91478	-4.82964	-7.94241	-5.7692
1390034_at	Ralgps2	Ral GEF with PH domain and SH3 binding motif 2	-1.86544	-1.64736	-1.50714	-1.40069	1	-1.65173	-1.64856	-1.62994	-1.40295	-2.95609	-3.83027	-3.37141	-3.09349	-2.08297	-5.21341	-4.78099	-4.33771	-5.21759	-4.0448
1390457_at	1390457_at		-2.77564	-2.63185	-3.89954	1	1	-3.368	1	1	1	-3.88518	1	-6.89279	-2.52801	1	-3.60067	-5.35612	-4.67828	-9.3693	-2.80446
1392535_at	Pycrl	pyrroline-5-carboxylate reductase-like	-1.92069	1	-1.71446	1	1	1	1	1	1	-5.94299	1	-4.40654	-2.72711	-2.36555	-4.15491	-4.5263	-4.52325	-4.35366	-4.07514
1388406_at	Nat15	similar to RIKEN cDNA 1200013P24	1	1	1	1	1	1	1	1	1	-4.41	1	-5.08245	-2.21632	-2.16215	-4.59134	-5.16359	-4.27094	-4.19978	-3.84418
1386918_a_at	Oprs1	opioid receptor, sigma 1	-1.49619	-1.46411	1	1	1	1	1	1	-1.52542	-4.17215	-4.63508	-4.42413	-2.71374	-1.69958	-4.07787	-4.63931	-4.41536	-5.93495	-3.88924
1386016_at	Hspb11	heat shock protein family B (small), member 11	1	1	1	1	1	1	1	1	1	1	1	1	1	1	-6.77848	-7.52612	1	-9.55504	1
1393738_s_at	Mfhas1	malignant fibrous histiocytoma amplified sequence 1	1	1	1	1	1	1	1	1	1	1	1	1	1	1	1	1	1	-5.13135	1
1398727_at	1398727_at		1	1	1	1	1	-1.88868	1	1	1	-1.98571	-2.69613	1	1	1	-4.98372	-3.68656	-3.49664	-6.79132	-7.82587
1368115_at	Cldn3	claudin 3	1	1	1	1	1	1	1	1	1	-3.60765	-3.857	-3.98178	-1.89266	1	-7.04647	-12.8237	-11.7963	-25.6259	-8.3257
1379959_at	Wrb	tryptophan rich basic protein	1	1	1	1	1	1	1	1	1	1	1	1	1	1	1	-5.97074	1	-4.69292	-5.00216
1379768_at	1379768_at		1	1	1	1	1	-2.33986	1	1	1	1	1	1	1	1	-4.05695	-4.60466	-4.35438	-6.06091	-4.47712
1389561_at	Tmem218	similar to RIKEN cDNA 1810021J13	-1.71259	1	1	1	1	1	1	1	1	-2.25911	1	-2.99877	-1.92874	-1.77896	-5.3844	-5.11368	-5.7417	-5.92255	-4.35357
1387521_at	Pdcd4	programmed cell death 4	1	1	-1.9927	1	1	-1.79831	1	1	1	-1.64478	1	-1.80911	1	-1.93501	-4.5218	-6.40339	-6.55306	-4.57983	-3.69065
1383787_at	LOC641520	Popeye domain-containing 3	1	1	1	1	1	1	1	1	1	1	1	1	1	1	1	-9.21733	-8.9558	-7.56005	1
1379021_a_at	1379021_a_at		1	1	1	1	1	1	1	1	1	1	1	1	1	1	1	-4.68052	-3.72193	-11.3843	-10.6716
1391269_at	LOC317366		1	1	1	1	1	1	1	1	1	1	1	1	1	1	1	-10.8647	1	-8.78482	-8.1441
1392590_at	Arhgap24	Rho GTPase activating protein 24	1	-1.81752	1	-1.71496	1	-1.64882	1	1	1	-3.05857	-9.47141	-3.44301	-1.69062	-1.71261	-6.4879	-6.11511	-6.83365	-5.61225	-6.20732
1384238_at	Ttyh2	tweety homolog 2 (Drosophila)	-1.35776	-1.4768	-1.45052	1	1	1	-1.29101	-1.37338	-1.26557	-3.42876	-2.94801	-3.57756	-1.9613	-1.48139	-5.55948	-5.47829	-4.92398	-5.8377	-5.95674
1389918_at	LOC290704		1	1	1	1	1	1	1	1	1	-2.6976	1	-2.02142	1	1	-5.79262	-6.28562	-8.00232	-7.34978	-7.80887
1375215_x_at	Pgpep1	pyroglutamyl-peptidase I	-1.56994	-1.48475	-1.4545	-1.21721	1	-1.59121	-1.37918	1.14714	-1.32647	-3.4545	-2.1024	-3.09733	-1.75042	-2.11088	-6.7302	-8.56933	-9.6403	-8.83414	-7.83824
1389430_at	1389430_at		1	1	-4.46489	1	1	1	1	1	1	-2.40139	1	-4.75758	1	1	-4.32322	-4.82635	-10.2511	-2.77412	-8.57255
1374890_at	Ube2d2		1	1	1	-1.39144	-1.41044	-1.54637	-1.38872	1	1	-1.67034	-2.08478	-1.75197	-2.4258	-1.45561	-4.47113	-5.83235	-4.34088	-4.42445	-5.34239
1379934_at	Lyst		1	1	-1.39804	-1.46422	1	-1.36393	1	1	1	-1.83794	-2.28711	-2.00995	-1.64956	-1.4857	-5.37948	-5.34796	-6.21188	-3.86071	-5.11104
1390228_at	Aof1	amine oxidase, flavin containing 1	1	-1.6557	-1.66559	1	1	1	1	1	1	-2.87932	-5.92474	-3.38426	1	1	-4.47127	-3.76508	-4.44647	-3.40763	-4.47047
1389545_at	Tbl1xr1	transducin (beta)-like 1X-linked receptor 1	1	-1.78935	-1.52699	1	1	1	1	1	1	-2.93045	-2.73496	-3.29979	-1.64536	1	-4.5255	-6.1447	-5.73502	-5.27761	-6.70207
1371332_at	LOC684681	similar to Histone H1.2 (H1 VAR.1) (H1c)	1	1	1	1	1	1	1	1	1	-1.77066	-2.03126	-4.08396	2.03676	1	-5.28189	-6.2553	-9.47068	-3.64832	-6.6364
1397808_at	Ctsc		1	-1.2979	1	-1.29647	-1.29074	1	1	-1.29392	1	-1.87702	-3.54598	-3.74835	-2.13512	-1.76508	-5.82108	-3.62026	-3.91152	-5.81683	-3.95107
1388945_at	RGD1311307	similar to 1300014I06Rik protein	-1.50963	1	1	-1.88542	1	1	-1.53599	1	-1.40789	-2.87159	-2.87986	-3.29427	-2.21457	-2.24376	-4.14817	-7.45479	-4.95033	-4.78286	-3.8579
1367644_at	Adcy6	adenylate cyclase 6	1	1	1	1	1	1	-1.63589	1	1	-3.24755	-3.05223	-4.13917	-1.75496	-1.93441	-4.83866	-8.03846	-5.63352	-4.88801	-6.16744
1382381_at	1382381_at		1	1	1	1	1	1	1	1	1	-2.99673	-3.42705	-3.42178	-2.34399	1	-3.6088	-6.70229	-5.44314	-4.43139	-5.29472
1369097_s_at	Gucy1b3	guanylate cyclase 1, soluble, beta 3	1	1	1	1	1	1	1	1	1	-2.39882	1	-2.23488	1	1	-4.69379	-6.86544	-3.76532	-3.81668	-3.78875
1372907_at	Atp6v0e2	ATPase, H+ transporting, lysosomal V0 subunit E2	1	1	1	1	1	1	1	1	1	-3.33457	1	-4.217	1	1	-4.21172	-5.48632	-5.93942	-5.85238	-5.76221
1397307_at	RGD1566317_predicted		1	1	1	1	1	1	1	1	1	1	1	1	1	1	-6.18769	-6.56266	-4.14942	-4.02223	-4.80816
1389111_at	1389111_at		1	1	1	1	1	1	1	-1.52328	1	-1.96251	1	-1.95389	-2.40235	1	-4.95598	-4.87768	-4.8721	-3.97911	-5.39673
1377979_at	LOC502782		1	1	1	1	1	1	1	1	1	1	1	-5.33604	1	1	-4.11311	-4.39146	-4.78682	1	1
1384841_at	Ctsc		1	1	1	1	1	1	1	1	1	-2.70193	1	-5.36684	-2.90584	-2.4062	-10.2375	-5.0252	-3.70517	-3.14759	-3.27882
1381063_at	Adcy9_predicted		1	1	1	1	1	1	1	1	1	-2.79899	-3.53718	-3.50628	1	-1.94715	-4.23395	-9.44746	-5.15284	-3.82099	-3.757
1375342_at	Nfic	Nuclear factor I/C	1	1	1	1	1	1	1	1	1	1	1	-4.01064	1	-3.15001	-4.17025	-3.95001	-3.54345	-5.8877	-4.68639
1369684_at	Tcfe2a	transcription factor E2a	1	1	1	1	1	1	1	1	1	1	1	1	1	1	1	1	1	1	-7.08596
1368275_at	Sc4mol	sterol-C4-methyl oxidase-like	1	1	-2.41525	1	1	1	1	1	1	-2.4707	-2.27888	-2.66127	-1.7324	1	-7.47892	-11.3252	-8.88429	-6.4566	-10.1
1372069_at	Ankrd15	ankyrin repeat domain 15	1	1	1	-1.5538	1	-1.58762	-1.5621	-1.39567	-1.32376	-4.37992	-5.97593	-6.82542	-1.72641	-1.72824	-10.1944	-11.8508	-8.94502	-8.69702	-8.16424
1379647_at	1379647_at		1	1	1	1	1	1	1	1	1	-4.61144	-5.43345	-3.52206	-2.50528	-1.61022	-9.40568	-12.356	-7.05451	-9.94409	-5.79498
1374117_at	Baiap2	brain-specific angiogenesis inhibitor 1-associated protein 2	1	1	1	1	1	1	1	1	1	-3.58373	1	-3.60243	1	1	-6.45872	-9.46118	-11.5191	-6.8438	-16.2169
1386571_at	RGD1562626		1	1	1	1	1	1	1	1	1	-11.9682	1	-11.5786	1	1	-4.91523	-12.2086	-6.73356	-9.05951	-12.1726
1372281_at	Lyplal1	lysophospholipase-like 1	1	1	1	1	1	1	1	1	1	1	1	1	1	1	-19.714	1	1	1	-22.3585
1378745_at	Per3	period homolog 3 (Drosophila)	1	1	1	1	1	1	1	1	1	1	1	1	1	1	1	1	1	1	-13.9538
1383188_at	1383188_at		1	-1.98248	1	1	-2.19622	1	-2.50408	-2.26402	-1.84342	-2.63163	-7.26859	-4.87702	-3.42731	-2.16484	-13.8144	-12.4525	-7.40805	-11.5672	-11.6198
1389632_at	Rhobtb1	Rho-related BTB domain containing 1	1	1	1	1	1	1	1	1	1	1	1	1	1	1	-9.05643	-16.8557	-6.86047	-10.1456	-17.0559
1398296_at	Gde1	glycerophosphodiester phosphodiesterase 1	-1.5234	1	1	1	-1.62072	1	-4.0687	-2.89036	-2.28496	-4.8311	-8.67342	-5.00659	-2.82773	-2.38258	-22.1511	-11.1962	-7.52048	-5.80912	-6.50706
1367627_at	Gatm	glycine amidinotransferase (L-arginine:glycine amidinotransferase)	1	1	1	-1.81927	1	1	-3.58108	-1.48741	-1.96534	-4.78644	-6.97638	-7.21346	-2.44994	-1.8577	-8.23074	-4.81967	-6.28547	-8.43548	-8.03597
1380248_at	Sema4g	sema domain, immunoglobulin domain (Ig), transmembrane domain (TM) and short cytoplasmic domain, (semaphorin) 4G	-1.42117	-1.52983	-1.62976	1	1	1	-2.78977	-2.33205	-2.41737	-6.54733	-4.64551	-4.98189	-4.15207	-3.17011	-5.55928	-7.0837	-6.32511	-4.10406	-4.59772
1377037_at	Acot4	acyl-CoA thioesterase 4	1	1	1	1	1	1	1	-3.34966	1	-5.38496	-26.2393	-6.54277	-6.51977	-2.2095	-7.44694	-11.3853	-6.01673	-23.5791	-7.2509
1387130_at	Slc40a1	solute carrier family 39 (iron-regulated transporter), member 1	1	1	1	1	1	1	-3.1115	-2.97426	-2.86404	-4.73394	-8.6689	-7.18038	-4.90753	-2.57909	-4.91068	-7.55935	-5.83385	-5.56836	-12.9495
1394833_at	Chn2		1	1	1	1	1	1	-3.91733	-2.59367	-3.18861	-9.48476	-14.935	-11.6344	-8.43466	-9.077	-9.59632	-8.75369	-4.60101	-4.45675	-5.28486
1387470_at	Cldn1	claudin 1	1	1	1	1	1	1	-3.83695	-3.25101	-3.32841	-8.24414	1	-10.9155	-5.29079	-3.59169	-7.86807	-8.79468	-5.42143	-9.39543	-5.03847
1370259_a_at	Pthr1	parathyroid hormone receptor 1	1	1	1	1	1	-1.90881	-5.26523	1	1	-8.03719	-7.54145	-12.0011	-5.63898	-8.067	-11.3005	-9.14744	-10.807	-15.9867	-9.58123
1383946_at	Cldn1	claudin 1	1	1	1.33313	1	1	1	-3.84218	-2.48222	-2.74175	-12.8022	-12.91	-23.2974	-4.88176	-3.76491	-17.7068	-28.8311	-13.3444	-34.4232	-31.7675
1374217_at	RGD1310686	similar to chromosome 16 open reading frame 5	1	1	1	1	1	1	-2.33951	-2.14972	1	-11.0738	-17.9301	-16.0304	-2.60171	-4.74341	-15.0724	-15.6326	-13.0912	-42.8299	-23.7644
1368797_at	Nr1i3	nuclear receptor subfamily 1, group I, member 3	-2.10468	1	-2.11944	1	1	1	-2.71457	1	1	-7.73618	-5.45812	-8.6426	-2.76845	1	-13.6905	-19.6791	-22.6587	-36.9973	-10.2949
1384512_at	Prnd		1	1	1	-1.62885	1	1	-2.66418	-1.86017	-1.66969	-13.8566	-16.1612	-23.452	-7.3588	-1.93476	-55.2931	-62.5894	-55.0356	-47.148	-33.0823
1376924_a_at	Palmd	palmdelphin	1	1	1	-1.89262	1	-2.01477	-3.10599	-1.6587	-1.55747	-10.1128	-4.43638	-8.73662	-2.47643	-3.79409	-25.4231	-31.7039	-17.1492	-19.6383	-11.4871
1395734_at	Palmd	palmdelphin	1	1.34372	1	-1.54645	1	-1.58114	-2.37347	-1.73061	-1.72646	-4.61849	-2.91355	-4.55932	-2.57121	-3.26301	-9.9496	-11.3193	-11.0534	-10.434	-8.04207
1382764_at	RGD1310552_predicted		1	1	1	1	1	1	1	1	1	1	1	1	1	1	-15.6523	-16.7867	-13.4231	-12.4838	-12.0669
1396773_at	1396773_at		1	1	1	1	1	1	1	1	1	-5.32434	1	-4.72993	1	1	-22.9495	-9.15811	-6.37289	-14.6495	-13.2643
1394432_at	Zfyve1	zinc finger, FYVE domain containing 1	1	1	1	1	1	1	1	1	1	1	1	1	1	1	-15.8734	-15.4161	-5.711	-11.639	-11.3992
1373108_at	Ppp1r3c	protein phosphatase 1, regulatory (inhibitor) subunit 3C	1	1	-1.60176	-1.56533	1	-2.07533	-2.20958	-1.75294	-2.68273	-2.15413	-6.49564	-4.31243	1	-2.30729	-41.4134	-100	-51.2418	-45.4157	-20.7448
1368249_at	Klf15	Kruppel-like factor 15	-1.3227	1	-1.31011	1	1	-1.24951	-2.40589	-1.71596	-2.10025	-2.57447	-3.36513	-6.5203	-2.14136	-1.78593	-9.07243	-17.4508	-9.61353	-8.59461	-6.2481
1381396_s_at	Klf15	Kruppel-like factor 15	1	1	1	1	1	1	-2.17957	1	-1.87598	-2.27986	-1.83428	-4.73186	-1.83691	-1.8691	-7.16754	-7.60885	-6.73305	-5.00112	-5.08175
1390819_at	Tef	thyrotroph embryonic factor	1	1	1	1	1	1	1	1	1	-3.73804	1	1	1	-2.98232	-12.9244	-9.46106	-5.53645	-11.7842	-7.57898
1377405_at	Ralgps2	Ral GEF with PH domain and SH3 binding motif 2	1	1	1	1	1	1	-2.97149	-1.60701	-2.36897	-2.68921	1	-3.06912	-3.26614	-2.54154	-5.45594	-6.01788	-6.56545	-5.50588	-5.06446
1391545_at	Ccdc52	coiled-coil domain containing 52	1	1	1	1	1	1	1	1	1	1	1	1	-2.6041	1	-5.51796	-5.42378	-6.49192	-7.79742	-6.35531
1376738_at	Ttc23	tetratricopeptide repeat domain 23	1	1	1	1	1	-1.60264	-3.08076	1	-1.68505	1	-5.97606	-2.16618	-2.00783	1	-4.82224	-4.74495	-5.93469	-4.26479	-4.03625
1388753_at	Sulf2	sulfatase 2	1	1	1	1	1	1	-3.70164	1	-2.24624	-2.5399	-2.56799	-3.57705	-2.51671	-2.1711	-8.97912	-7.50074	-6.19607	-5.9624	-7.6408
1368945_at	Bmp2	bone morphogenetic protein 2	1	1	1	-1.97428	1	1	-2.29333	-3.38003	1	1	1	-3.52208	-4.44833	-2.03171	-17.9614	-6.86833	-3.15388	1	-7.13114
1378049_at	Zfp362	zinc finger protein 362 /// zinc finger and SCAN domains 20	1	1	1.46821	1	1	1	-2.09924	1	1	-3.1856	-6.79158	-4.04532	1	-1.78627	-6.53052	-6.99321	-5.91068	-4.17027	-9.32348
1382864_at	Palmd	palmdelphin	1	1.37919	1	-1.39183	1	-1.66801	-2.3873	-1.43945	-1.56119	-3.17836	-2.43042	-2.74343	-1.98141	-2.19411	-7.2627	-8.36203	-7.55063	-5.51415	-10.4747
1390148_a_at	Zfp395	zinc finger protein 395	1	1	1	1	1	-1.71707	-2.60815	1	1	-2.11394	1	-2.65854	-1.91639	-2.46461	-7.31535	-5.41821	-8.49968	-12.3822	-9.51036
1372531_at	Ppfibp2	protein tyrosine phosphatase, receptor-type, F interacting protein, binding protein 2	1	1	1	-2.08004	1	-1.75243	1	1	1	-2.40534	1	-2.84739	-2.1751	-1.67069	-13.3445	-14.4165	-12.1773	-11.145	-10.7732
1377156_at	LOC679869	similar to Transcription factor 7-like 2 (HMG box transcription factor 4) (T-cell-specific transcription factor 4) (TCF-4) (hTCF-4)	1	1	1	-1.5148	-1.3926	-1.53588	-2.17317	1	1	-1.57335	-2.2215	-2.42966	-1.951	-1.67903	-7.40408	-4.68608	-5.02835	-4.06542	-6.14275
1373055_at	1373055_at		1	1	1	1	1	1	-2.13919	1	1	-2.00893	-3.09017	-3.99128	-1.84927	-1.73781	-7.14108	-5.38289	-5.46566	-6.69904	-7.03562
1384542_at	1384542_at		1	1	1	1	1	-1.70612	-2.03191	-2.15897	1	-1.95542	1	-2.27542	-2.45206	-2.24595	-3.99245	-3.89567	-4.68041	-6.747	-4.97887
1367948_a_at	Kdr	kinase insert domain protein receptor	1	1	1	-1.54995	1	1	-2.18087	-1.57056	-1.60451	-3.22713	-5.74657	-4.63134	-2.0728	-1.63414	-7.49471	-6.37376	-6.11881	-6.41995	-4.6928
1378094_at	LOC685611		1.81757	1	1	1	1	1	1	1	1	-3.36673	1	-6.86097	-2.23774	-2.94797	-6.20974	-7.09778	-7.20674	-4.51825	-6.73154
1370474_at	Thrb	thyroid hormone receptor beta	1	1	1	1	1	1	-2.15196	1	1	-3.58513	1	-3.79681	-3.17664	-3.4899	-4.75336	-4.77194	-4.78116	-6.39369	-4.5107
1385585_at	1385585_at		1	1	1	1	1	1	-2.12007	1	1	-3.82594	1	-4.12745	-2.76253	-3.12405	-4.80692	-5.79726	-4.73691	-5.9815	-6.99382
1376868_at	Cobll1	Cobl-like 1	1	1	1	1	1	1	-1.97578	-1.77321	-1.53557	-4.98508	-7.7519	-5.10247	-2.90405	-2.40308	-7.11197	-9.52425	-14.1868	-5.81533	-9.05513
1381133_at	Plcb1		1.44101	1	1	1	1	1	-1.68708	1	-1.61047	-4.1018	-2.31309	-3.23314	-3.99764	-2.41957	-7.18292	-4.43454	-4.66412	-5.93716	-7.18277
1389551_at	Lactb2	lactamase, beta 2	1	1	1	1	1	1	1	1	1	-3.38985	-8.44369	-3.70013	1	1	-6.26412	-3.86527	1	-5.95183	-4.96991
1383280_at	Tmem56		1	1	1	1	1	1	-1.44568	-1.51619	-1.3831	-2.46015	-1.87377	-2.40842	-2.03201	-1.80806	-4.38987	-3.89774	-5.32411	-5.40413	-4.48579
1388890_at	1388890_at		1	1	1	1	1	1	1	1	1	-3.2747	-3.19903	-4.44988	-2.30691	1	-5.29372	-5.90498	-4.52438	-4.15626	-5.66908
1380831_at	1380831_at		1	1	1	1	1	1	1	1	1	-3.09756	1	-2.43303	-2.35114	-2.18777	-4.25755	-5.54218	-4.38509	-4.14506	-5.0141
1370816_at	Nr1d1	nuclear receptor subfamily 1, group D, member 1	1	1	1.82245	1	-1.7043	1	-2.15409	-3.02048	1	-3.77956	1	-2.15654	1	-2.27459	-6.47766	-3.18027	-2.73863	-3.98484	-6.12427
1368154_at	Gucy1a3	guanylate cyclase 1, soluble, alpha 3	1	1	1	1	1	1	-2.35775	-2.33764	-1.99921	-4.37529	-3.77438	-2.44664	-1.8244	-1.97345	-10.2278	-11	-10.4513	-5.20605	-10.4287
1379361_at	Pex11a	peroxisomal biogenesis factor 11A	1	1	1	1.52628	1	1	-2.36278	-2.17615	-1.9218	-4.2098	-3.83338	-3.29416	-2.91031	1	-3.98121	-4.69926	-5.19235	-4.90781	-5.90944
1372276_at	Agpat3	1-acylglycerol-3-phosphate O-acyltransferase 3	1	1	1	1	1	1	1	-3.19778	1	-2.61949	1	-2.5492	1	-2.55513	-7.32492	-3.67216	-5.95158	-8.84072	-5.98303
1386927_at	Cpt2	carnitine palmitoyltransferase 2	1	1	1.4438	1	1	1	-2.39002	-1.80478	-1.67269	-4.11998	-3.6751	-3.1535	-1.49209	-2.28435	-5.49455	-3.94219	-5.27271	-7.56612	-3.91473
1392516_a_at	Stard4	StAR-related lipid transfer (START) domain containing 4	1	1	1	1	1	1	-2.01225	-2.05424	1	-3.56023	-3.66495	-2.40354	-2.18957	-2.18637	-4.28878	-4.56931	-5.56614	-4.42601	-4.53031
1396150_at	Cldn1	claudin 1	1	1	1	1	1	1	-2.41935	-1.82395	-2.27556	-3.89337	-4.72188	-5.51647	-3.00373	-2.56446	-5.8239	-5.00035	-4.25934	-6.21121	-5.09212
1388104_at	Lgr4	leucine-rich repeat-containing G protein-coupled receptor 4	1	1	1	1	1	1	-2.67085	-2.05286	-2.9115	-3.32256	-2.98562	-4.74804	-3.09367	-3.04992	-5.13811	-7.29259	-4.57193	-3.76424	-7.13814
1383695_at	Vipr1	vasoactive intestinal peptide receptor 1	1	1	1	1	1	1	-3.87428	-2.63889	-2.62145	-4.35174	-7.63731	-4.91661	-4.09029	-3.15619	-5.41363	-5.46389	-4.34922	-3.73512	-8.08141
1375879_at	Lgr4		1	1	1	1	1	1	-2.37889	-1.91015	-2.17104	-2.86799	-3.25126	-3.51007	-2.3875	-2.47779	-5.05873	-4.63956	-4.50833	-3.63161	-7.27673
1383550_at	Btd	biotinidase	1	1	1	1	1	1	1	1	1	1	1	1	1	1	-6.06264	1	-6.1721	-7.02687	-9.53096
1380471_at	1380471_at		1	1	1	1	1	1	-2.86657	-2.95776	-2.19775	-5.37926	1	-6.8934	-2.97245	-4.38968	-6.34902	-5.48535	-4.18628	-4.90869	-5.1465
1374635_at	LOC689663	Hypothetical protein LOC689663	1	1	1	1	1	1	-2.64265	-1.85253	-1.84423	-2.9672	-4.36032	-2.9023	-3.11488	-2.95435	-5.51657	-5.76605	-4.80213	-4.49175	-4.71037
1383790_at	1383790_at		1	1	1	1	1	1	1	1	1	-5.59695	1	-4.37731	1	1	-6.83579	-7.26385	-3.47355	-3.63454	-4.95013
1392933_a_at	LOC690085		1	1	1	1	1	1	1	1	1	1	1	-9.69082	1	1	1	-10.4214	-7.35893	-13.7183	-4.59354
1381472_at	Slc25a32_predicted		1	1	1	1	1	1	1	1	1	1	1	1	1	1	-4.37422	-12.4979	-8.18979	-6.32642	-6.76791
1374389_at	Gucy1b3	guanylate cyclase 1, soluble, beta 3	1	1	1	1	1	1	1	1	1	1	1	1	1	1	-3.04643	-14.1481	-8.18571	-10.9166	-10.6212
1383439_at	Npas2	neuronal PAS domain protein 2	1	1	1	1	1	1	1	1	1	1	1	1	1	1	1	-6.34351	-23.6612	1	1
1383917_at	Abi3	ABI gene family, member 3	1	1	1	1	1	1	1	1	1	1	1	1	1	1	1	1	1	1	-13.9947
1369099_at	Slc30a1	solute carrier family 30 (zinc transporter), member 1	1	1	1	1	1	-1.30607	-1.26868	-1.44915	1	-2.00234	1	-2.31431	-1.88553	-1.83633	-5.73858	-4.92047	-5.66983	-5.6979	-5.56338
1383665_at	Lpin2	lipin 2	1	1	1	1	1	1	1	1	1	1	1	1	-2.55226	1	-10.9649	-10.1041	-5.07541	-6.20393	-4.13523
1390863_at	Slc19a2	solute carrier family 19 (thiamine transporter), member 2	1	1	1	-1.84554	-1.46731	-1.45946	1	1	1	-1.49352	-2.05226	1	-2.40427	-1.70137	-7.44835	-9.74595	-6.8443	-7.3739	-4.8626
1386478_at	Mcart1	mitochondrial carrier triple repeat 1	1	1	1	1	1	1	1	1	1	1	1	-2.13866	1	1	-6.38313	-6.04396	-4.54706	-3.13272	-5.1988
1381019_x_at	Asap1	development and differentiation enhancing	1	1	1	1	1	1	1	1	1	1	1	1	1	1	-9.81864	-3.72873	-8.92241	-3.42274	-5.05863
1395694_at	Fbxo9	f-box protein 9	1	1	1	1	1	1	-1.41235	1	-1.2981	-1.99468	-2.54347	-2.5233	-1.56246	-1.78898	-4.24307	-5.9132	-6.82471	-5.64128	-3.47093
1378346_at	Emilin2_predicted		1	1	1	1	1	1	1	1	1	1	1	1	1	1	-8.35051	-7.16783	-4.27677	-7.36713	-9.08205
1385243_at	Maf		1	1	1	-1.77488	1	1	-1.54974	-1.46918	-1.38639	-1.70336	-2.22141	-2.42834	1	-1.54173	-6.48271	-7.65542	-6.82533	-6.13406	-6.91999
1379885_at	Fmo4	flavin containing monooxygenase 4	1	1	1	1	1	1	1	1	1	-2.17572	1	1	1	1	-5.57111	-6.65495	-3.90125	-4.32052	-5.80495
1369073_at	Nr1h4	nuclear receptor subfamily 1, group H, member 4	3.15189	1	1	1	1	1	1	1	1	1	1	1	-2.38437	1	-10.3052	-10.4815	-12.1421	-23.9943	-8.4865
1391442_at	Ehd3	EH-domain containing 3	1	-1.42393	1.31275	-1.46184	1	1	-2.63531	-2.03406	-1.52327	-3.38809	-4.08796	-3.69968	-1.99374	1	-9.75314	-9.47078	-10.4651	-12.5023	-8.39179
1372621_at	Fam176b	similar to 2610027C15Rik protein	1	1	1	1	1	1	1	1	1	1	1	1	1	1	-8.5315	-5.44648	-11.86	-6.05942	-9.56198
1374657_at	Anks4b	similar to Harmonin-interacting ankyrin repeat-containing protein (Harp)	1	1	1	1	1	1	1	1	1	1	1	1	-3.17024	1	-26.3587	-13.5473	-19.7769	-30.6449	-13.3194
1367981_at	Rabep1	rabaptin, RAB GTPase binding effector protein 1	1	1	1	1	1	1	1	1	1	1	1	1	1	1	-23.453	-15.3752	-7.41972	-17.4327	-8.40911
1393352_at	RGD1310552	similar to hypothetical protein MGC38960	1	1	1	1	1	1	-1.92098	1	1	-4.52132	-4.2311	-4.92697	-1.6901	-1.5915	-16.5569	-10.7807	-9.15226	-13.1198	-26.3276
1373239_at	Snx33	sorting nexin 33	1	1	1	1	1	1	1	1	1	1	1	1	1	1	-38.6426	-13.582	-33.0149	-5.74745	-3.90834
1379294_at	1379294_at		1	1	1	1	1	1	1	1	1	1	1	1	1	1	-33.0882	-9.85336	-23.8564	-23.8197	-10.9417
1379238_at	Ctdspl	CTD (carboxy-terminal domain, RNA polymerase II, polypeptide A) small phosphatase-like	1	1	2.6144	-3.95204	1	-3.03664	-2.98924	1	1	1	1	1	1	-3.6819	-23.0273	-22.1073	-9.87521	-7.11293	-15.5113
1369972_at	Serpinb5	F-box protein 21	1	1	1	1	1	1	1	1	1	-3.59066	1	-4.39296	-2.24953	1	-20.3517	-24.4138	-13.0373	-37.0491	-9.32053
1382372_at	Ahr		1	1	1	1	1	1	1	1	1	1	1	1	1	1	-7.80415	-12.7945	-15.5409	-9.40537	-4.77926
1383253_at	Slc30a1		1	1	1	1	-1.25	1	-1.22736	-1.37493	-1.24694	-1.96343	-2.88658	-2.57234	-2.4086	-1.79534	-7.48728	-11.0357	-9.42905	-7.43164	-8.17452
1392274_at	Pdgfc		1	1	1	1	1	1	1	1	1	1	1	1	-3.20616	-2.56481	-9.49222	-19.3658	-6.44698	-9.79652	-6.66055
1383632_at	Slc30a1		1	1	1	1	1	-1.24531	-1.40298	-1.40521	-1.31806	-2.11846	-2.01541	-2.50736	-2.57468	-1.9532	-11.2458	-13.8711	-12.0563	-8.01005	-10.1506
1372654_at	Eps8l2	EPS8-like 2	1	1	1	1	1	1	1	1	1	-3.01791	1	-3.14156	-2.29218	1	-9.69428	-10.4498	-10.2327	-11.3921	-7.30456
1385482_at	Ddx26		1	1	1	1	1	1	1	1	1	1	1	1	1	1	-8.84904	-11.5748	-8.96162	-8.90875	-8.78445
1370725_a_at	G6pc	glucose-6-phosphatase, catalytic	1	1.57002	1.43236	-1.33819	-1.34084	1	-4.9113	-1.4101	-3.18319	1	1	1	-2.33195	1	-21.177	-21.7065	-2.35382	-5.04189	-3.9765
1369444_at	Cyp19a1	cytochrome P450, family 19, subfamily a, polypeptide 1	1	1	1	1	1	1	1	1	1	1	1	1	1	1	-12.6576	1	1	1	1
1367771_at	Tsc22d3	TSC22 domain family 3	1	1	1.71184	1	1.6254	1	-2.03573	-1.83898	-2.00407	1	1	1	3.11364	1	-7.08596	-9.39939	-9.24322	-11.481	-8.44158
1391456_at	Jam3	junctional adhesion molecule 3	1	1	1	1	1	1	1	1	1	1	1	1	1	1	1	-9.16377	1	-7.53372	1
1378982_at	1378982_at		1	1	1	1	1	1	1	1	1	1	1	1	1	1	-5.20487	-7.26738	-6.15393	-8.00701	-7.65768
1374789_at	Sh3gl2		1	1	1	1	1	1	1	1	1	1	1	-3.03865	1	1	-8.05794	-8.44254	-11.7173	-7.01193	-4.22087
1370256_at	Fzd1	frizzled homolog 1 (Drosophila)	1	1	1	1	1.77697	1	1	1	2.37094	1	1	-2.22702	1	1	-6.59768	-10.7098	-6.82692	-5.92925	-6.51359
1381098_at	LOC690217	similar to B0511.12 /// similar to chromosome 14 open reading frame 135	1	1	1	1	1	1	1	1	1	1	1	1	1	1	1	-6.20376	1	1	1
1368877_at	Zfp354a	zinc finger protein 354A	1	1	1	3.72507	1	1	-5.92526	-4.85614	1	1	1	1	1	1	-8.40883	-9.97538	-11.0714	-8.12938	-9.42683
1383315_at	Tsku	tsukushin	1	1	1	3.59904	3.09818	7.00751	1	1	1	1	1	1	1	5.98735	-11.2757	-11.3419	-12.4028	-8.53142	-11.6256
1398170_at	Slc27a1		1	1	1	1	1	1	1	1	1	1	1	1	1	1	-18.6197	-15.3078	-14.4601	-14.079	1
1393421_at	Pxmp4	peroxisomal membrane protein 4	1	1	1	2.67733	1	1	1	1	1	1	1	1	1	-12.5564	-10.3306	-12.6983	-8.14326	-8.19371	-16.8757
1387588_at	Ehd3	EH-domain containing 3	1	1	1	1	1	1	-2.86732	-2.47785	1	-4.24164	1	-3.99134	-2.13751	1	-7.26375	-8.28588	-8.36393	-14.7016	-5.33071
1369467_a_at	Pfkfb1	6-phosphofructo-2-kinase/fructose-2,6-biphosphatase 1	1	1.69556	1	1.99766	1.85954	1.76239	-4.37813	-3.88043	-2.29247	-2.56466	1	1	1	1	-8.09546	-3.41193	-4.5352	-4.82814	-3.84283
1376623_at	Tmem204	transmembrane protein 204	1	1	1	1	1	1	-2.30669	-1.7133	1	-2.91073	1	-2.83069	1	1	-4.13561	-5.75701	-5.4431	-6.14845	-6.97177
1375504_at	Polg2	polymerase (DNA directed), gamma 2, accessory subunit	-1.26505	1	1.27959	1	1	1	-2.25796	-1.42722	-1.61717	-3.48268	-3.05061	-3.18715	-1.53998	1	-3.1288	-4.96518	-4.93755	-4.61144	-3.96333
1373122_at	Jub	ajuba	1	1	1	1	1	1	1	1	1	1	1	1	1	1	-4.36041	-5.01777	-5.17788	-4.70397	-9.6182
1371534_at	Slc25a22	solute carrier family 25 (mitochondrial carrier, glutamate), member 22	1	1	1	1.67328	1.61549	1.63159	1	1	1	-2.60689	-3.22043	-2.34341	1	1	-4.61694	-4.86808	-4.46931	-7.00607	-3.86584
1379248_at	Prcp	prolylcarboxypeptidase (angiotensinase C)	1	1	1	1	1	1	1	1	1	1	1	1	1	1	1	-7.79769	1	1	-22.4221
1375350_at	1375350_at		1.86652	1	1	1	1	1	-2.4008	1	1	-3.69126	-4.55612	-3.04377	1	1	-9.40625	-7.81203	-9.04654	-3.06459	-5.94273
1390145_at	LOC315676		1	1	1	1	1.57292	1	1	1	1	-4.5215	-6.68108	-4.88593	-2.6957	1	-4.92296	-6.35178	-4.38192	-3.87913	-6.92389
1389084_at	RGD1309985_predicted		1	1	1	1	1	1	1	1	1	-4.88158	1	-10.098	1	1	-7.24718	-6.92601	-5.94891	-3.08422	-3.24457
1374984_at	Epb4.1l5	erythrocyte protein band 4.1-like 5	1	1	1	1	1	1	1	-10.3245	1	1	1	-4.32266	1	-4.87725	-3.76048	-4.15203	1	-10.5807	-10.1282
1393743_at	1393743_at		1	1	3.11516	3.31363	1	1	-9.70148	-3.5559	-8.85624	-9.03216	1	-8.09934	1	-5.35776	-7.04546	-8.52153	-7.74481	1	-6.82051
1390416_at	Slc25a30	Solute carrier family 25, member 30	2.91144	1	2.32159	1	1.50783	2.49303	1	1	1	-2.15972	1	1	-1.67685	-1.71608	-4.91159	-4.84773	-4.47013	-5.99264	-4.28957
1381973_at	Slc25a30	solute carrier family 25, member 30	3.00476	1	2.46949	1	1	2.7282	1	1	1	-3.06435	1	1	1	1	-5.31215	-5.56805	-5.62441	-8.89288	-5.37227
1374929_at	Ccdc126	coiled-coil domain containing 126	2.25836	1	1	1	1	1	1	1	1	-4.56277	1	1	1	1	-5.61593	-6.24216	-6.893	1	-4.46409
1388874_at	Mtss1	metastasis suppressor 1	1.97561	1.99948	2.1882	2.03478	1.49691	1.61631	-1.72213	-2.3801	1	-2.03147	-1.83824	-1.75747	1	1.72823	-6.27937	-6.31025	-5.67781	-5.78072	-7.9414
1371995_at	Klhl21	kelch-like 21 (Drosophila)	1	1	1	1	1	1	1	1	1	1	1	1	1	1	1	1	-24.3501	-15.3459	1
1393437_at	1393437_at		2.01106	1	1.9275	1	1	1	-3.61127	-3.26825	1	-2.63892	1	-7.02679	-2.8879	1	-7.36522	-5.14458	-8.93923	-9.31771	-5.92994
1383164_at	1383164_at		1.86995	1.98308	1.69991	1	1.42152	1	-1.99879	-2.41018	-1.69125	-3.46513	-3.31741	-4.53573	-2.84523	-2.4494	-8.02429	-9.51668	-10.2884	-8.53497	-8.63479
1394459_at	FAM120C	family with sequence similarity 120C	1	1	1	1	1	1	1	1	1	-3.45843	1	1	1	-2.60564	1	-2.10664	-2.14795	1	1
1379242_at	LOC684996	similar to chromosome 7 open reading frame 11	1	1	1	-2.45831	1	-2.62783	1	1	1	-5.89895	1	-5.00131	-2.59775	-2.76779	1	1	1	1	1
1387810_at	Keap1	Kelch-like ECH-associated protein 1	1	-3.04264	1	1	1	1	1	1	1	-5.43396	1	-5.80206	1	1	1	1	1	1	1
1394783_at	Dcun1d1	Dcn1, defective in cullin neddylation 1, domain containing 1 (S. cerevisiae)	1	1	1	1	1	1	1	1	1	1	1	1	1	1	1	1	1	1	-2.59135
1383494_at	Srbd1	S1 RNA binding domain 1	1	1	-2.65244	1	1	1	1	1	1	1	1	-2.68794	1	1	1	-2.20892	-2.97645	1	1
1372449_at	1372449_at		1	1	1	-3.16304	1	1	1	1	1	1	1	1	1	1	1	1	1	1	1
1377879_at	1377879_at		1	-3.5783	1	1	1	1	1	1	1	-2.22922	1	-2.56632	1	-2.29333	-3.74065	1	1	1	1
1380646_at	Elmod2	ELMO domain containing 2	1	1	1	1	1	1	1	1	1	1	1	-2.85018	-3.59386	-2.57054	1	1	1	1	-3.2206
1380719_at	1380719_at		1	1	1	1	1	1	1	1	1	1	1	-2.51967	1	1	1	1	1	1	-3.00058
1368698_at	Atp2b2	ATPase, Ca++ transporting, plasma membrane 2	1	1	1	1	1	1	1	1	1	1	1	-2.51412	1	1	1	1	1	1	1
1397955_at	Rtel1	regulator of telomere elongation helicase 1	1	1	1	1	1	1	1	1	1	-2.64273	1	-3.03793	1	1	1	1	1	1	-5.6777
1375448_at	Opa3	optic atrophy 3 (human)	1	1	1	1	1	1	1	1	1	1	1	-2.73569	1	1	1	-2.04809	1	-2.18409	-2.08268
1371716_at	LOC685179	similar to SWI/SNF-related matrix-associated actin-dependent regulator of chromatin c2 isoform b /// similar to SWI/SNF-related matrix-associated actin-dependent regulator of chromatin c2	-1.64395	-1.5188	-1.77786	1	1	1	1	1	1	-2.4802	1	-3.58291	-1.60735	-2.05543	-1.91136	-1.84959	1	-1.68136	-2.07674
1386983_at	Hmbs	hydroxymethylbilane synthase	1	1	1	1	1	1	1	1	1	-2.93929	1	-3.13938	-1.93697	-1.90941	-2.24861	-2.16017	-2.04017	-2.65957	1
1395420_at	1395420_at		-1.41698	-1.8983	1	1	1	1	1	1	1	-2.10582	-4.13233	-3.19754	-2.14783	-1.83493	-2.02388	-1.73888	-1.69827	-2.28919	-1.64786
1380459_at	Btbd14a	BTB (POZ) domain containing 14A	1	-1.85893	1	1	1	1	1	1	1	-1.80597	1	-2.28503	-1.64493	-1.59135	-1.79011	-2.54467	-2.04545	-1.73481	-2.27206
1388995_at	Rnf14	ring finger protein 14	-1.56713	-1.69515	-1.5969	-1.43112	1	-1.51173	-1.21861	-1.26075	1	-2.22224	-3.40442	-2.80023	-1.53159	-1.45151	-1.78989	-2.16813	-1.81295	-1.91681	-2.0391
1381994_at	Aebp2_predicted		1	1	-1.7087	1	1	-1.70526	1	1	1	-2.06769	-4.01227	-2.93769	1	1	1	-2.1043	-1.78904	-1.73046	-1.73764
1373174_at	Nudt16l1	nudix (nucleoside diphosphate linked moiety X)-type motif 16-like 1	1	-1.64976	-1.63758	1	1	1	1	1	1	-1.88144	1	-2.04852	-1.63362	-1.6157	-2.06511	-1.97194	-1.94894	-1.66636	-1.76301
1393065_at	RGD1562582	similar to KIAA0406-like protein	-1.57109	1	1	-1.781	1	-1.56627	1	1	1	-2.30493	1	-3.12341	1	1	-1.67935	-1.89379	1	-2.1889	1
1378570_at	1378570_at		-1.54333	-1.86514	-1.5096	-1.51376	1	1	1	1	1	-2.58607	-4.05909	-2.2045	-1.45684	-1.93028	-2.06361	1	1	1	-2.00445
1386817_at	Pctk3		1	1	1	1	1	1	1	1	1	-2.15989	1	1	-2.02679	1	-1.98142	-1.84164	1	-2.01206	1
1371493_at	Ap2a2	Adaptor protein complex AP-2, alpha 2 subunit	-1.88042	-1.56836	1	1	-1.57467	1	1	1	1	-2.25176	-3.15935	-2.0169	-1.70147	-1.59262	-1.73114	-2.00372	1	-1.89865	-1.66002
1398627_at	Mpp6_predicted		1	1	1	1	1	1	1	1	1	1	1	-3.07701	1	1	1	1	1	1	1
1383265_at	Tbc1d23	TBC1 domain family, member 23	1	-1.95362	-2.10477	1	1	1	1	1	1	1	-2.25911	-1.90245	1	1	1	1	1	1	1
1368410_at	Mpg	N-methylpurine-DNA glycosylase	-2.35249	1	1	1	1	1	1	1	1	1	-5.51745	1	1	1	1	1	1	1	1
1389078_at	Fbxl6	F-box and leucine-rich repeat protein 6	1	1	1	1	1	1	1	1	1	1	1	-4.2212	1	1	1	1	1	1	1
1373542_at	Sphk2	sphingosine kinase 2	-1.46333	-2.21971	1	1	1	1	1	1	1	-2.23327	-1.73442	-3.652	-1.69695	-1.88793	-1.65435	1	-1.77977	-1.68237	1
1373198_at	Dnajc22	similar to RIKEN cDNA 2810451A06	-1.73464	-1.53465	-1.77825	1	1	1	1	1	1	-3.74724	-3.15545	-3.93146	-2.29481	-1.60308	-1.37181	-1.56484	-1.41714	-1.6593	-1.57891
1371950_at	Pdzd11	PDZ domain containing 11	1	1	1	1	1	1	1	1	1	-3.53922	-4.05693	-3.15018	-2.58918	-1.94192	1	1	1	-2.77787	1
1398769_at	Coro1b	coronin, actin-binding protein, 1B	1	1	1	1	1	1	1	1	1	-3.39559	1	-4.69739	-2.87914	1	1	1	1	1	1
1372488_at	Enoph1	enolase-phosphatase 1	-2.02665	-1.92488	1	1	1	1	1	1	1	-2.29898	-5.0484	-2.28425	1	-2.68329	1	1	1	1	-1.85474
1370203_at	Frag1	FGF receptor activating protein 1	1	-1.64588	-1.61639	1	1	1	1	1	1	-2.35463	-6.94315	-3.03914	-2.47351	-2.049	-1.71855	-1.62185	-1.56087	1	-1.94988
1373618_at	Crebl2	cAMP responsive element binding protein-like 2	-1.83936	-2.03219	-1.78167	1	1	1	1	1	1	-2.91931	-4.59807	-2.99303	-2.0252	1	-1.80738	-1.66411	1	1	1
1372099_at	Fam21c	family with sequence similarity 21, member C	1	1	1	1	1	1	1	1	1	-1.71248	-2.21414	-2.12344	-2.02534	-1.73587	-1.9566	-1.67696	-1.62188	-1.54692	-1.46501
1368096_at	Rab7l1	RAB7, member RAS oncogene family-like 1	1	1	1	1	1	1	-2.0847	1	1	-2.36467	-2.71226	-2.27131	-2.1946	-1.54732	-1.61783	-2.15192	-1.51282	-1.48546	-1.50245
1368036_at	Ptprf	protein tyrosine phosphatase, receptor type, F	-2.0234	-1.75624	-1.89981	-1.37292	-1.44219	-1.54807	-1.4616	-1.28644	-1.29685	-2.08365	-1.86962	-2.04789	-2.47605	-1.99869	-1.56644	-1.79823	-1.43742	-1.37135	-1.29786
1398421_at	Nfat5	nuclear factor of activated T-cells 5	1	1	1	1	1	1	1	1	1	1	1	-3.18712	1	1	1	1	1	1	1
1377662_at	Pir	pirin	1	-2.44946	-1.704	1	-2.12891	1	-2.05425	-1.70655	1	-2.03359	1	-5.3263	-1.72571	-2.01756	1	1	-2.10513	-2.8062	1
1390153_at	RGD1311350		1	1	-1.69926	1	1	-1.61065	-1.67226	-2.23801	-1.58218	-2.14902	-2.72238	-2.86675	-2.15666	-1.95673	-1.8858	-1.69505	1	1	1
1388675_at	Spns1	similar to spinster-like protein	1	1	1	1	1	1	1	1	1	1	1	1	1	1	1	-2.29032	1	1	1
1377961_at	Zfhx3	zinc finger homeobox 3	1	1	1	1	1	1	1	1	1	1	1	1	-2.75902	-2.54554	1	1	1	-2.69751	1
1383606_at	Tc2n	tandem C2 domains, nuclear	1	-1.82131	-1.83144	1	1	1	1	-1.59048	1	-1.84909	-4.06575	-2.66845	-1.66487	1	-1.74144	-1.68866	-1.87448	-1.76211	-1.56312
1393180_at	Ctdsp1	CTD (carboxy-terminal domain, RNA polymerase II, polypeptide A) small phosphatase 1	1	1	1	1	1	1	1	1	1	-2.43179	1	-3.21459	-2.60835	-2.31264	1	1	1	1	1
1368088_at	Cdk5	cyclin-dependent kinase 5	1	1	1	1	1	1	1	1	1	-2.76943	1	-3.18777	1	1	1	1	1	1	1
1373194_at	Lyrm2	LYR motif containing 2 /// midasin homolog (yeast)	1	1	-1.7809	1	1	1	1	1	1	-2.194	-9.75579	-2.80803	1	1	1	1	1	1	1
1372008_at	Taz	tafazzin	1	1	1	1	1	1	1	1	1	-3.15604	-2.90107	-3.21254	1	1	-1.97908	-1.80282	1	1	-1.87658
1390427_at	RGD1563278_predicted		1	1	1	1	1	1	1	1	1	-3.87015	1	1	1	1	1	1	1	1	1
1386979_at	Tpo1	developmentally regulated protein TPO1	-1.4178	-1.62896	-1.81	-1.45574	1	-1.41104	1	-1.36988	1	-3.45585	-2.56008	-5.13193	-1.38155	-1.52055	-2.58524	-1.51167	-2.33704	-2.00001	-4.08804
1386959_a_at	Map2k5	mitogen activated protein kinase kinase 5	1	1	1	1	1	1	1	1	1	1	1	-4.41482	1	1	1	1	1	1	-4.05355
1377214_a_at	RGD1303117	hypothetical protein LOC292764	1	1	1	1	1	1	1	1	1	-3.04397	1	-3.57122	1	1	1	1	1	1	1
1370335_at	Dab2ip	disabled homolog 2 (Drosophila) interacting protein	1	1	-1.6181	1	1	1	1	1	1	-2.66248	1	-2.29126	1	-2.01045	-2.12327	-1.98923	1	-2.17945	-2.18783
1387129_at	Xrcc1	X-ray repair complementing defective repair in Chinese hamster cells 1	1	1	1	1	1	1	1	1	1	-2.79471	1	-3.4021	1	-2.75414	1	-2.57664	1	1	1
1394222_at	Znf771	zinc finger protein 771	1	1	1	1	1	1	1	1	1	-3.40958	1	-4.95461	1	1	1	1	1	1	1
1376235_at	1376235_at		1	1	1	1	1	1	1	1	1	-2.19184	1	-3.27883	1	1	-2.04353	-2.23613	-1.79622	-1.51545	-1.72963
1387357_at	Tmlhe	trimethyllysine hydroxylase, epsilon	1	1	1	1	1	1	1	1	1	-2.65763	1	-2.51553	1	1	1	1	1	1	1
1368318_at	Homer1	homer homolog 1 (Drosophila)	1	1	1	1	1	-1.71052	1	1	1	-3.955	-3.95625	-3.6443	1	1	-2.12078	-1.79764	-2.28114	1	1
1377654_at	Fam3a	family with sequence similarity 3, member A	1	-1.49471	1	1	1	1	1	1	1	-3.01237	-4.90345	-2.82606	-1.82025	1	-1.70139	-1.66678	-1.80134	-1.79902	-1.66483
1389329_at	Lgals8	lectin, galactose binding, soluble 8	-1.41375	-1.34281	-1.50867	-1.33521	-1.23608	1	-1.27943	-1.31038	-1.36644	-2.57365	-2.52921	-2.74842	-1.9497	-1.57839	-1.63199	-1.49032	-1.49196	-1.57363	-1.7095
1373807_at	Vegfa	vascular endothelial growth factor A	-1.32819	-1.43542	-1.26225	-1.33744	1	-2.16676	-1.72359	-1.37775	-1.34098	-3.28602	-6.43041	-4.43325	-1.5471	-3.06155	-1.77759	-1.70524	-1.67084	1	-1.5148
1387188_at	Slc17a1	solute carrier family 17 (sodium phosphate), member 1	1	1	1	1	1	1	1	1	1	1	1	1	1	1	1	1	-2.48819	1	1
1385320_at	Magix	MAGI family member, X-linked	1	1	1	1	1	1	1	1	1	-3.02428	1	1	1	1	-2.21807	-2.39067	1	1	1
1374669_at	Brwd2	bromodomain and WD repeat domain containing 2	1	-1.5324	1	1	1	1	1	1	1	-3.1241	1	-4.03054	-1.68575	1	-2.08108	-1.78184	-1.50085	-1.61034	-2.20492
1387977_at	Nbn	nibrin	1	1	1	1	1	1	-1.66292	-1.69108	1	-3.12072	-2.1088	-3.6511	1	1	-1.5726	-1.46582	-1.67409	-1.60773	-1.85905
1377257_at	1377257_at		1	1	1	1	1	1	1	1	1	-2.86534	1	-4.50337	1	1	1	1	1	1	-3.13919
1378194_a_at	Rufy3	RUN and FYVE domain containing 3	1	1	1	1	1	1	1	1	1	-1.93661	1	-3.40479	1	1	1	1	1	1	1
1390406_at	Arhgap18	Rho GTPase activating protein 18	1	1	1	1	1	1	1	1	1	-2.85014	1	-2.68678	1	1	-2.45588	1	-2.56468	1	-3.56162
1367518_at	Fto	fat mass and obesity associated	1	1	1	1	1	1	1	1	1	1	1	-2.59531	1	1	-2.10131	-1.89318	1	1	1
1373466_at	Cast	calpastatin	-1.36149	-1.34177	-1.30683	1	-1.30186	-1.48128	-1.43774	-1.30522	1	-2.21062	-2.43663	-2.28748	-1.45464	-1.4407	-1.76952	-1.78473	-1.6268	-1.63279	-2.14717
1388518_at	Fbxw5	F-box and WD-40 domain protein 5	-1.38069	1	1	1	1	1	1	1	1	-2.83496	-2.43875	-2.78109	-1.44156	-1.60767	-1.69976	-1.45434	-1.59462	-1.76294	-1.79331
1377202_at	Smc6l1	SMC6 structural maintenance of chromosomes 6-like 1 (yeast)	1	-1.63269	-1.69627	1	1	1	-1.57336	1	1	-2.46663	1	-3.3052	-1.69479	-1.85454	-2.22713	1	1	1	-2.42773
1390781_at	Abcb10	ATP-binding cassette, sub-family B (MDR/TAP), member 10	1	-2.01946	1	1	1	1	1	1	1	-2.25665	1	-2.38611	1	-2.01668	1	-2.06004	-2.01172	1	-2.58995
1390107_at	Sytl2	synaptotagmin-like 2	1	1	1	1	1	1	1	1	1	-2.22425	1	-2.47554	1	-1.98967	1	1	-2.23992	1	1
1393561_at	RGD1560364_predicted		1	-1.45765	1	-1.52185	-1.40751	-1.58288	-1.99034	-1.44961	-1.40842	-2.32111	-2.94492	-2.3289	-1.62929	-1.66601	-1.66621	-1.64516	1	-1.49213	-2.14584
1384531_at	Crb3	crumbs homolog 3 (Drosophila)	1	1	1	1	1	1	1	1	1	1	1	-5.89818	1	1	1	1	1	1	1
1384029_at	Xpa	xeroderma pigmentosum, complementation group A	1	1	1	-2.15503	1	-1.749	1	1	1	-3.06712	1	-2.9652	1	-1.90009	1	1	-2.04376	1	1
1378334_a_at	Itpr2		1	-2.90696	1	1	1	1	-3.2621	1	1	-3.49727	1	-2.21878	-2.72633	1	1	-2.01663	-2.12303	1	1
1370380_s_at	Nr2f6	similar to Orphan nuclear receptor EAR-2 (V-erbA-related protein EAR-2) /// nuclear receptor subfamily 2, group F, member 6	1	1	1	1	1	1	1	1	1	-5.38321	1	-5.04715	-2.54052	1	1	1	1	1	1
1381421_at	Rft1	RFT1 homolog (S. cerevisiae)	1	1	1	1	1	1	1	1	1	-4.0459	1	-4.32327	1	1	1	1	1	1	1
1391817_at	RGD1304595	similar to RIKEN cDNA 6330416G13 gene	1	-2.06619	-2.01717	1	1	1	1	1	1	-3.03753	-3.55678	-2.84036	-1.95746	1	1	1	1	1	1
1368002_at	Msh2	mutS homolog 2 (E. coli)	1	1	1	1	1	1	1	1	1	-3.97541	1	1	1	1	-2.41616	1	1	1	1
1398634_at	LOC686032	hypothetical protein LOC678836	-1.26294	-1.47004	-1.60702	1	-1.19014	1	-1.37292	-1.29233	1	-3.4067	-3.5938	-3.04458	-2.41646	-1.60718	-2.15776	-1.79369	-1.63436	-1.36874	-1.61812
1373643_at	1373643_at		1	1	1	1	1	1	1	1	1	1	1	1	1	1	1	-4.02231	1	1	1
1396133_at	Itgb5	Integrin, beta 5	1	1	1	1	1	1	1	1	1	-6.47509	1	1	1	1	1	1	1	1	1
1389434_at	Bbs9	Bardet-Biedl syndrome 9	-1.6464	-1.66648	1	1	1	1	-1.62251	-1.68324	-1.77694	-1.96039	1	-2.20698	-2.31201	-2.33424	1	1	1	1	1
1386938_at	Anpep	alanyl (membrane) aminopeptidase	-1.24516	-1.31036	-1.19639	-1.37907	1	1	-1.77856	-1.46567	-1.77143	-1.94954	-2.14132	-2.10599	-2.38778	-2.08218	-1.47923	-1.25664	1	1	-1.19827
1387297_at	Klrg1	killer cell lectin-like receptor subfamily G, member 1	1	1	1	1	1	1	1	-1.9036	-2.16637	-1.81027	-6.02139	1	-1.90028	1	1	1	1	1	1
1383333_at	RGD735112	similar to RIKEN cDNA 5830404H04	1	1	1	1	1	1	-1.77883	1	1	-2.33871	1	-1.80684	-2.1009	-1.94134	1	1	1	1	1
1387215_at	Agxt	alanine-glyoxylate aminotransferase	-1.24505	1	1	1	1	1	-1.71528	-1.67003	-2.36194	-1.85912	-2.14638	-2.13219	-2.46885	-1.91332	-1.24594	-1.3129	-1.61077	-1.49533	-1.47668
1398334_a_at	Commd9	COMM domain containing 9	1	1	1	1	1	1	1	1	1	-2.24314	1	-2.15106	1	1	1	1	1	1	1
1385087_at	1385087_at		1	1	1	1	1	1	1	-2.05219	-1.96646	-2.39045	-4.16893	-2.93179	1	-2.01753	1	1	1	1	1
1371451_at	Rnaseh2a	ribonuclease H2, large subunit	1	1	1	1	1	1	1	1	1	1	1	1	1	-3.44439	1	1	1	1	1
1377550_at	Slc25a23	solute carrier family 25 (mitochondrial carrier; phosphate carrier), member 23	1	1	1	1	1	1	1	1	-2.34564	1	1	-2.75872	1	-2.3656	1	1	1	1	1
1374065_at	Met		1	1	1	-1.42906	1	-1.37273	-1.72424	-1.61727	-1.7044	-2.09808	-2.3039	-2.06561	-2.01872	-1.82523	-1.77765	-1.338	1	1	-1.26854
1374849_at	Adamts7	a disintegrin-like and metallopeptidase (reprolysin type) with thrombospondin type 1 motif, 7	1	1	1	1	1	1	1	1	1	1	1	1	-2.16549	-2.03201	1	1	1	1	1
1373644_at	Nfib		1	-1.56213	-1.2464	-1.4879	-1.2751	-1.41469	-1.78338	-1.31143	-1.55806	-2.53767	-2.31422	-2.77677	-1.39072	-2.26184	-1.53506	-1.54647	-1.46675	-1.37641	-1.58336
1367468_at	Scand1	SCAN domain-containing 1	-1.34619	-1.25236	-1.26158	-1.30894	-1.35562	-1.27803	-1.65594	-1.34934	-1.46677	-2.55757	-2.52514	-1.51243	-1.56086	-1.8947	-1.48699	-1.42258	1	-1.35885	-1.29583
1371782_at	Nipsnap3a	nipsnap homolog 3A (C. elegans)	1	1	1	1	-1.75286	1	1	-1.82103	-1.46849	-2.27547	-3.36748	-2.03956	-2.71158	1	-1.54412	-1.60641	-1.54755	-1.35184	-1.43271
1369086_a_at	Cacna1d	calcium channel, voltage-dependent, L type, alpha 1D subunit	1	1	-2.17148	1	1	1	1	1	1	1	1	1	-2.4527	1	1	1	1	1	1
1374364_at	RGD1562335	similar to mKIAA1931 protein	1	1	1	1	1	-2.33885	1	1	1	1	1	-2.39303	1	1	1	-1.51296	1	1	-1.46439
1369093_at	Reln	reelin	1	-1.76004	1	1	1	-2.0996	-1.79595	1	1	-2.05296	1	1	-2.11184	1	-1.71696	1	1	1	1
1393280_at	Ly86	lymphocyte antigen 86	1	1	1	-2.13274	1	1	1	1	1	1	1	1	1	1	1	1	1	1	1
1384857_at	Akap9	A kinase (PRKA) anchor protein (yotiao) 9	1	1	1	1	1	1	1	1	1	1	1	1	-2.79855	1	1	1	1	1	1
1391526_at	Kif16b	kinesin family member 16B	1	-2.3473	1	1	1	1	1	1	1	-3.55321	-4.29493	-4.4244	1	1	1	-1.81639	-1.75166	1	1
1392675_at	RGD1559793_predicted		1	1	1	1	1	1	1	1	-2.05984	1	1	-3.01958	1	1	1	1	1	1	1
1392405_at	Tfdp2	transcription factor Dp 2	1	-2.2825	1	1	1	1	-2.19832	1	-2.65363	-2.29439	1	1	1	1	1	1	1	1	-3.53622
1367545_at	Rabgap1	RAB GTPase activating protein 1	1	1	1	1	1	1	1	-1.77949	1	-2.22459	1	-3.14482	1	1	1	1	1	1	-1.91556
1384505_at	1384505_at		1	1	1	1	1	-1.93422	1	1	1	1	1	-1.97153	1	-2.64449	1	1	1	1	1
1394846_at	RGD1562625	similar to killer activatory receptor-like protein p91D	1	1	-10.3901	1	1	1	1	1	1	1	-7.05097	-2.99649	-2.91303	1	1	1	1	1	1
1380044_x_at	1380044_x_at		1	1	1	1	1	1	1	-2.33209	1	1	1	1	1	1	1	1	1	1	1
1376852_at	Mccc1	methylcrotonoyl-Coenzyme A carboxylase 1 (alpha)	1	1	1	1	1	1	-2.06172	-1.81543	-1.67979	1	-4.53044	-2.09688	-1.78559	-1.62183	-1.4077	-1.59549	1	-2.00077	-1.64251
1376682_at	Lpin3	lipin 3	1	1	1	1	1	1	1	1	1	1	-3.55745	-2.45804	1	1	1	1	1	1	1
1375093_at	Rbks	ribokinase	1	1	1	1	1	1	1	1	1	1	-5.45209	1	1	1	1	-1.74476	1	1	1
1372304_at	Commd4	COMM domain containing 4	1	1	1	1	1	1	1	1	1	1	-6.95132	-2.83579	1	1	-2.60437	1	1	1	1
1388430_at	Ptov1	prostate tumor over expressed gene 1	1	1	1	1	1	1	1	1	1	-2.74794	-4.05607	1	1	-2.44154	1	1	1	1	1
1371983_at	Josd1	Josephin domain containing 1	1	1	1	1	1	1	1	1	1	-1.97642	-5.58922	-3.72749	1	-1.84051	1	-1.55736	-1.54445	-1.55761	1
1371993_at	Cpne3	Copine III	1	1	1	1	1	1	1	1	1	-2.02242	-3.10462	-2.53903	-1.63987	1	-1.58122	1	1	1	1
1371834_at	Dctn2	dynactin 2	-1.66323	-2.16697	-1.62004	1	1	1	-1.33547	1	1	-3.09097	-3.97261	-3.54857	-1.45383	-1.48224	-1.60725	-1.33252	-1.30765	-1.36492	-1.511
1379654_at	Giyd2	GIY-YIG domain containing 2	1	1	1	1	1	1	-1.86942	1	-1.81743	-2.73661	-4.9706	-2.88595	-1.85053	1	1	1	1	1	1
1389220_at	LOC682679	hypothetical protein LOC682679	1	1	1	1	1	1	1	1	1	1	1	-2.65087	1	1	1	1	1	1	1
1390806_at	RGD1309730	similar to RIKEN cDNA B230118H07	-1.3731	1	-1.31992	1	-1.40229	1	-1.48485	1	-1.4618	-2.06346	-2.34076	-1.8117	-1.31022	-1.4837	-1.85376	-1.55598	-1.5555	-1.76	-1.55049
1372980_at	Tspan33	tetraspanin 33	1	1	1	1	1	1	1	1	1	1	1	1	1	1	1	-2.78911	1	1	1
1382126_at	Ncor1	Nuclear receptor co-repressor 1	1	1	-1.42708	1	1	1	-1.56706	1	-1.56327	-1.75479	-3.46992	-1.91155	-1.46239	1	-1.78485	-1.97567	-1.70775	-1.64246	1
1399107_at	RGD1305158	similar to RIKEN cDNA 1810030N24	1	1	1	1	1	1	1	1	1	-1.67031	-4.48505	-2.42248	1	1	1	1	1	-1.67383	-1.65514
1392484_at	rCG_20739		1	1	-1.29864	1	1	1	1	1	1	-1.99048	-2.61565	-2.17486	-1.41565	-1.49614	-1.46324	-1.72707	-1.46938	-1.4457	-1.61257
1393587_a_at	RGD1309605	similar to RIKEN cDNA 2310047O13	-1.32078	-1.50027	-1.64541	1	1	1	-1.38975	-1.29736	1	-2.24433	-2.4177	-2.49655	-1.7515	-1.23027	-1.60285	-1.67219	-1.31854	-1.49837	-1.81626
1376094_at	Hint3	histidine triad nucleotide binding protein 3	1	1	1	1	1	1	1	-1.73706	1	-2.22357	-3.53428	-2.11008	-1.8397	1	-1.79939	-1.55906	-1.54942	1	-1.97818
1375634_at	Ccdc53	coiled-coil domain containing 53	1	-1.21634	-1.29758	-1.20367	-1.33994	-1.23108	-1.36027	-1.3569	-1.24458	-2.53615	-2.8069	-2.15409	-1.67087	-1.51867	-1.79001	-1.64828	-1.43116	-1.86462	-1.86953
1376130_a_at	Dtnb	dystrobrevin, beta	1	1	1	1	1	1	1	1	1	-3.30082	1	-2.47931	-2.41552	1	1	1	1	1	1
1388933_at	LOC500709		1	1	1	1	1	1	1	1	1	-2.94868	1	1	1	1	1	1	1	1	1
1368960_at	Lgals8	lectin, galactose binding, soluble 8	-1.28115	-1.65569	-1.35291	1	1	1	-1.40051	-1.41996	-1.35764	-2.31049	-2.13262	-2.63832	-1.84297	-1.46069	-1.74419	-1.56353	-1.30474	-1.44223	-1.32291
1383664_a_at	RGD1560544_predicted		1	1	1	1	1	1	1	1	1	1	1	1	1	-2.78112	1	1	1	1	1
1398392_at	1398392_at		1	1	1	1	1	1	1	1	1	1	1	-2.99917	1	1	1	1	1	1	1
1394535_at	Kif16b	kinesin family member 16B	1	1	1	1	1	1	1	1	1	1	-7.13983	1	1	1	1	1	1	1	1
1375909_at	Gstm4	similar to glutathione transferase GSTM7-7	1	1	1	1	1	1	1	-1.89268	-2.23958	-1.81784	-3.72264	1	-1.94539	-2.05925	1	1	1	1	1
1367534_at	Rabgap1	RAB GTPase activating protein 1	1	1	1	1	1	1	1	1	1	1	1	1	1	1	1	-1.58241	-1.42245	1	-1.67262
1378458_at	Pbx1_predicted		1	1	1	1	1	1	1	1	1	1	1	-2.27244	1	1	1	1	1	1	1
1368245_at	Upb1	ureidopropionase, beta	1	-2.15949	1	1	1	1	-1.56415	-1.33165	1	-2.71093	-2.52806	-1.34093	-1.52512	1	1	1	-2.78882	1	-1.89347
1369995_at	Faf1	Fas-associated factor 1	1	1	1	1	1	1	1	1	1	1	-2.3212	-1.87592	1	1	-1.59195	1	1	1	1
1372828_at	Msrb2	methionine sulfoxide reductase B2	1	1	-1.40972	1	1	1	-1.58168	1	1	-2.02679	1	-2.00684	-1.75462	1	-1.81757	-1.51164	-1.65177	1	-1.48286
1367755_at	Cdo1	cysteine dioxygenase 1, cytosolic	-1.16415	1	-1.29807	1	1	1	-1.90089	-1.40822	-1.51927	-2.07515	-2.37543	-2.08513	-1.74356	-1.30648	-1.46322	-1.39622	-1.56514	-1.13393	-1.80602
1381979_at	Sumf2	sulfatase modifying factor 2	1	1	1	1	1	1	1	1	1	1	1	1	1	1	-1.70857	1	1	1	1
1382634_at	Med14	mediator complex subunit 14	1	1	1	1	1	1	1	1	1	-2.45188	1	-2.37946	1	1	1	-2.12559	1	1	1
1370884_at	Spr	sepiapterin reductase	1	1	1	1	1	1	1	1	1	-2.62784	-2.70207	-2.52418	-1.99847	-1.77743	-1.61613	-1.59836	-1.73183	-1.4283	-1.39119
1376733_at	Igsf11	immunoglobulin superfamily, member 11	1	1	1	1	1	1	1	1	1	1	1	-2.31892	-1.77955	1	1	-1.49321	1	1	-1.43753
1370004_at	H2afy	H2A histone family, member Y	1	1	1	1	1	1	1	1	1	-2.43852	1	1	1	1	1	1	1	1	1
1379971_at	Zc3h6	zinc finger CCCH type containing 6	1	1	1	1	1	1	1	1	1	1	1	-4.61588	1	1	1	1	1	1	1
1372071_at	Cd320	CD320 molecule	1	1	1	1	1	1	-1.85161	1	1	-3.26812	1	-2.68271	1	-2.07886	-2.15872	-2.07515	1	1	1
1371728_at	rCG_21212	similar to ubiquitin protein ligase E3B	1	1	1	1	1	1	1	1	1	-2.66093	1	-3.6959	1	1	1	1	1	1	1
1388768_at	Sgsm2	small G protein signaling modulator 2	1	1	1	1	1	1	1	1	1	1	1	-3.74074	1	1	1	1	1	1	1
1370262_at	Mtdh	metadherin	1	1	1	1	1	1	-1.83967	1	-1.56034	-2.27798	-2.2402	-2.38436	1	1	-1.74485	-1.48341	-1.33201	-1.37632	-1.55947
1377015_at	Me3_predicted		1	1	1	1	-2.73216	-2.40027	-2.88393	1	1	1	1	-2.91779	1	-2.57271	1	-2.36863	1	1	-2.53008
1390444_at	1390444_at		1	1	1	1	1	1	1	1	1	1	-2.40844	1	1	-1.94462	-2.02076	1	1	1	1
1371202_a_at	Nfib	nuclear factor I/B	1	-1.37675	1	-1.31099	1	-1.33785	-1.76071	-1.28504	-1.42946	-2.2792	-1.96234	-2.1909	1	-2.57897	-1.37129	-1.45229	-1.33144	-1.25533	-1.38223
1393676_at	Foxp1		1	1	1	1	1	1	1	1	1	1	1	1	1	1	1	-3.21172	1	1	1
1376580_at	Fxn	frataxin	1	1	1	1	1	1	1	1	1	-2.10696	-3.05579	-2.21663	1	1	1	1	1	1	1
1375035_at	Mfn1		1	1	1	1	1	1	1	1	1	-2.02908	-1.95933	-2.30835	1	1	-1.73268	-1.7359	1	1	-1.8041
1392820_at	Fgf1		1	1	1	1	1	1	1	1	1	1	1	1	1	-2.21414	1	1	1	1	1
1368390_at	Araf	v-raf murine sarcoma 3611 viral oncogene homolog	1	1	1	1	1	1	-1.51627	1	1	-5.07272	-3.76231	-3.71867	-2.25587	-1.62027	1	1	1	1	1
1372675_at	RGD1306954	similar to RIKEN cDNA 1110004E09	1	1	1	1	1	1	1	1	1	-2.78911	1	-3.17845	1	1	1	1	1	1	1
1372419_at	Vrk3	vaccinia related kinase 3	1	1	1	1	1	1	1	1	1	-2.52148	-4.06485	-2.80449	-2.1091	1	1	1	1	1	1
1382285_at	Naga	N-acetyl galactosaminidase, alpha	1	1	1	1	1	1	1	1	1	-3.34066	-3.77449	-3.57688	1	1	1	1	-2.0428	1	1
1374743_at	Inadl	similar to channel-interacting PDZ domain protein isoform 1 (predicted)	1	1	1	1	1	1	1	1	1	-3.50344	1	-4.06069	1	1	1	1	1	1	-2.25455
1382385_at	Psmc6	proteasome (prosome, macropain) 26S subunit, ATPase, 6 /// similar to Psmc6 protein	1	-1.99814	-2.05182	1	1	1	1	1	1	-4.30214	-4.82936	-4.04071	1	1	1	1	1	1	1
1383912_at	LOC685045	similar to Protein C6orf115 /// similar to Protein C6orf115	1	1	1	1	1	1	1	1	1	-1.95683	1	-2.00851	-1.81157	1	1	1	1	1	-2.00572
1391474_at	Med14	mediator complex subunit 14	-1.32107	-1.40778	-1.39879	1	1	1	1	1	-1.26532	-2.30052	-2.21136	-2.25044	-1.41979	1	-1.22289	-1.27406	1	1	-1.48704
1388432_at	Optn	optineurin	-1.63196	-1.75358	-1.5504	1	1	1	1	1	1	-2.66162	1	-3.94146	1	1	-1.41808	-1.50641	1	1	-1.50418
1374847_at	Lztr1	leucine-zipper-like transcriptional regulator, 1	1	1	1	1	1	1	1	1	1	-2.11911	1	-3.51706	1	1	1	1	1	1	1
1372010_at	Mapkapk5	MAP kinase-activated protein kinase 5	1	1	1	1	1	1	1	1	1	1	1	-2.72676	1	1	1	1	1	1	1
1383953_at	Ercc5	excision repair cross-complementing rodent repair deficiency, complementation group 5	1	1	1	1	1	1	1	1	1	-3.13029	1	-3.92563	1	1	1	1	1	1	1
1377222_at	1377222_at		1	1	1	1	1	1	1	1	1	-3.15497	1	-3.03917	-2.74839	1	1	1	1	1	1
1372888_at	Ube4a	ubiquitination factor E4A, UFD2 homolog (S. cerevisiae)	-1.48377	-1.48111	-1.46174	1	1	1	1	1	1	-2.42535	-2.24871	-2.87453	-2.17173	-1.55082	-1.3641	-1.45427	-1.48873	-1.76894	-1.55797
1371651_at	Vps25	vacuolar protein sorting 25 homolog (S. cerevisiae)	1	1	1	1	1	1	1	1	1	-2.84832	-2.59983	1	1	1	1	1	1	1	1
1368824_at	Cald1	caldesmon 1	-1.36049	-1.32265	-1.2072	1	1	-1.27574	-1.42558	-1.30276	-1.63325	-2.29947	-1.56749	-2.2591	-1.95538	-1.62948	-1.41429	-1.47232	1	1	-1.30671
1385767_at	LOC304000	cell adhesion molecule JCAM	1	1	1	1	1	1	-1.26601	1	1	-2.56567	-2.32348	-3.15258	-2.18955	-1.68218	-1.45893	-1.22903	-1.49261	1	-1.25307
1399068_at	LOC680815	hypothetical protein LOC680815 /// similar to RIKEN cDNA 9430098E02	-1.52217	-1.66637	1	1	1	1	1	1	1	-2.72761	-2.55791	-2.88553	-1.61224	-1.61983	1	-1.83398	1	1	1
1398805_at	Atg3	autophagy-related 3 (yeast)	1	-1.58066	1	1	1	1	1	1	1	-2.07323	-2.47097	-2.19817	-1.58283	1	-1.42853	-1.42012	-1.27111	1	1
1377166_at	Als2	Amyotrophic lateral sclerosis 2 (juvenile) homolog (human)	1	1	1	1	1	1	1	1	1	-2.81722	1	-1.94555	-2.10362	1	1	1	1	1	1
1370134_at	Slc33a1	solute carrier family 33 (acetyl-CoA transporter), member 1	1	1	1	1	1	1	1	1	1	-2.70917	1	-2.59643	-2.27408	1	-1.39237	-1.24752	1	-1.2978	-1.28778
1373191_at	Bop1		1	-1.97403	1	1	1	1	1	1	1	1	1	-2.16932	1	1	1	1	1	1	1
1383389_at	Zer1	zer-1 homolog (C. elegans)	1	1	1	1	1	1	1	1	1	1	1	1	-2.27572	1	1	1	1	1	1
1368035_a_at	Ptprf	protein tyrosine phosphatase, receptor type, F	-1.94838	-2.02488	-1.96875	-1.37857	-1.44217	-1.51048	1	1	1	-2.28713	-1.84466	-2.03789	-2.86439	-1.69816	1	-1.58706	1	1	-1.36805
1393213_at	Ccnl2	cyclin L2	1	-1.46867	-1.91883	1	-1.50375	-1.68231	1	-1.58236	1	-2.07523	-1.84216	-1.92817	-2.13639	1	1	1	1	1	1
1390345_at	Snrp70_predicted		-1.34267	-1.49711	-1.39663	1	-1.35524	-1.43865	1	-1.3087	-1.50857	-1.871	-2.17771	-1.82747	-1.99655	-1.65904	1	1	1	1	1
1372680_at	Leng4	leukocyte receptor cluster (LRC) member 4	1	1	1	1	1	1	1	1	1	-2.15833	1	-2.18038	-2.04041	1	1	1	1	1	1
1392807_at	Lig3	ligase III, DNA, ATP-dependent	1	1	1	1	1	1	1	1	1	-1.96004	1	-1.84692	-1.83507	-1.75064	1	1	1	1	1
1383004_at	Ahcyl1	S-adenosylhomocysteine hydrolase-like 1	-1.65177	-1.59218	-1.48136	1	1	1	-1.50752	-1.43184	-1.41793	-1.92013	1	-1.84341	-1.91746	1	1	-1.32258	1	-1.36897	1
1373794_at	Egln2	EGL nine homolog 2 (C. elegans)	-1.57294	-1.37531	-1.6715	1	1	1	1	1	1	-2.0957	-1.83163	-2.14828	-1.41109	1	1	1	1	1	1
1388140_at	Rab13	RAB13, member RAS oncogene family	1	1	1	1	1	1	1	1	1	-2.21693	1	-1.90364	-1.87199	1	1	1	1	1	1
1387866_at	Myo9b	myosin IXb	-1.64859	-2.0262	1	1	1	1	1	1	1	-1.76514	1	-2.29953	1	-1.92466	1	1	1	1	1
1374418_at	Tmem188	transmembrane protein 188	-1.91687	1	-1.98891	1	1	1	1	1	1	-2.22559	1	-3.19004	1	-1.78176	1	1	1	1	1
1397200_at	Chd4	chromodomain helicase DNA binding protein 4	1	1	1	1	1	1	1	1	1	-1.96326	1	-2.57341	1	1	1	1	1	1	1
1372105_at	Efha1	EF hand domain family A1	1	-1.94966	-2.3368	1	1	1	1	1	1	-2.34672	1	-3.24893	1	-2.38204	1	1	1	1	1
1378462_at	Mtap_predicted		1	1	-2.2094	1	1	1	1	1	1	-2.21221	1	-2.96462	1	1	1	1	1	1	1
1392165_at	Ing2	inhibitor of growth family, member 2	1	1	1	1	1	1	1	1	1	-2.36619	1	-2.52538	-1.82976	-1.97886	1	1	1	1	1
1390517_at	Gcn1l1_predicted		1	1	1	1	1	1	1	1	1	-2.13855	1	1	1	1	1	1	1	1	1
1373923_at	Rdh10	Retinol dehydrogenase 10 (all-trans)	-1.41007	-1.64876	-1.44135	1	1	1	-1.63588	-1.46259	-1.54521	-1.93818	-1.75286	-1.89198	-2.12828	-1.68071	1	1	1	1	1
1372711_at	LOC498750	similar to cDNA sequence BC005537	-1.35279	-1.32808	-1.33982	-1.2546	-1.28204	-1.42565	-1.3169	1	1	-1.72253	-2.43683	-2.21738	-1.58018	-1.65026	1	1	1	1.15682	-1.17178
1374010_at	Lig3		1	-1.54916	-1.43704	1	1	1	-1.59967	-1.52373	-1.57173	-1.69694	1	-2.21626	1	-1.44575	1	1	1	1	1
1391916_at	1391916_at		1	1	1	1	1	1	1	1	1	1	1	-2.39833	1	1	1	1	1	1	1
1394268_at	Son	Son DNA binding protein	1	1	1	1	1	1	1	1	1	-2.50467	1	-4.35813	1	1	1	1	1	1	1
1395408_at	Nostrin	nitric oxide synthase trafficker	-1.72647	1	-1.53053	1	1	1	1	1	1	-3.08041	-2.52157	-3.0992	-1.91827	1	1	1	1	1	1
1369249_at	Ankh	progressive ankylosis	1	1	1	1	1	1	1	-2.11383	1	-2.76998	-6.44858	-1.84094	1	-1.73657	1	1	1	1	1
1393439_a_at	Ankh	progressive ankylosis	1	1	1	1	1	1	-1.52708	-1.74816	-1.63863	-2.39348	-4.98508	-1.93294	-1.47727	-1.48774	1	1	1	1	1
1387345_at	Psme4	proteasome (prosome, macropain) activator subunit 4	1	1	1	1	1	1	1	-1.71376	1	-1.97272	1	-1.74174	1	-1.39969	1	1	1	1	1
1374239_at	Farp2	FERM, RhoGEF and pleckstrin domain protein 2	1	1	1	1	1	1	-1.39284	-1.56352	-1.51371	-1.6369	-1.93435	-2.22398	-1.45662	-1.4343	1	1	1.47617	1.89011	1
1373221_at	Diaph1	Diaphanous homolog 1 (Drosophila)	1	1	1	1	1	1	-1.49532	1	1	-1.88921	-2.28673	-2.07652	1	-1.69238	1	1	1	1	-1.66127
1386344_at	Ankh	Progressive ankylosis	1	1	1	1	1	1	1	-2.11147	1	-4.9271	-3.65196	-3.85958	1	1	1	1	1	-1.80076	1
1372177_at	Mocs2	molybdenum cofactor synthesis 2	1	1	1	1	1	1	1	1	1	-2.8984	-2.20964	-2.65401	-2.45177	-1.71033	1	1	1	1	1
1367756_at	Gfm1	G elongation factor, mitochondrial 1	1	1	1	1	1	1	1	1	1	-2.48709	-2.89166	1	1	1	1	1	1	-1.46766	1
1384504_at	Magi1	membrane associated guanylate kinase, WW and PDZ domain containing 1	1	1	1	1	1	1	1	1	1	-1.92906	1	-2.872	-2.06668	1	1	1	1	1	-2.44604
1374995_at	Elmo3	engulfment and cell motility 3, ced-12 homolog (C. elegans)	1	1	1	1	1	1	1	1	1	-1.83128	1	-2.52929	-2.70452	1	1	1	1	1	1
1388565_at	Spg21	spastic paraplegia 21 homolog (human)	1	1	1	-1.26294	-1.38334	1	-1.4863	-1.39259	-1.34112	-2.27963	-4.01417	-2.01	-1.91046	-1.57103	-1.23001	1	1	1	1
1368053_at	Pard3	par-3 (partitioning defective 3) homolog (C. elegans)	1	1	1	1	1	1	1	1	1	-2.79464	1	1	1	1	1	1	1	1	1
1383341_at	Cab39l	calcium binding protein 39-like	1	1	1	1	1	1	1	1	1	-2.04795	1	-2.35473	1	1	1	1	1	1	1
1394778_at	Nfib		1	1	1	1	1	1	1	1	1	-2.33852	1	-2.36783	-1.74118	-1.92849	1	1	1	1	1
1372121_at	Usp9x	Ubiquitin specific peptidase 9, X chromosome	1	-1.40276	1	1	1	1	1	1	1	-2.03049	1	-2.02435	1	-1.52439	1	1	1	1	1
1370319_at	Ppif	peptidylprolyl isomerase F (cyclophilin F)	1	1	-1.3481	1.34951	1.63204	1	-1.43415	-1.60692	-1.84853	-2.08368	-1.8516	-2.26214	-1.37811	-1.5721	1	1	1	1	-1.23649
1390456_at	1390456_at		1	-2.54276	1	1	1	1	1	1	1	-2.12129	1	-3.4189	1	1	1	-2.12794	1	1	1
1392525_at	Ptgfr		1	1	1	1	1	1	1	1	1	1	1	-2.37696	1	1	1	1	1	1	1
1372816_at	1372816_at		1	1	1	1.85171	1	1	-1.96167	-1.76952	-1.87913	-2.478	-3.5506	-3.12536	-2.02049	1	1	-3.11043	1	1	1
1387190_at	Dgka	diacylglycerol kinase, alpha	1	1	1	1	1	1	1	1	1	-2.0626	1	-2.08025	-1.92236	1	-1.77173	-1.89998	1	1	1
1378687_at	1378687_at		1	1	1	1	1	1	1	1	1	1	-5.55036	1	1	1	1	1	1	1	1
1390165_at	RGD735112	PR domain containing 15	1	-1.48109	-1.5486	1	1	1	-1.66132	-1.43381	-1.38066	-2.14949	-2.02703	-1.87643	-1.81835	-1.64785	1	1	1	1	1
1376642_at	Smpdl3b	sphingomyelin phosphodiesterase, acid-like 3B /// X Kell blood group precursor related family member 8 homolog	1	-2.01432	-2.0346	1	1	1	1	1	1	-2.08668	1	-2.29776	-2.02817	1	1	1	1	1	1
1373513_at	Gch		-1.43121	1	-1.34007	1	1	1	-1.72307	1	1	-1.96631	-2.92751	-3.03342	-2.51916	1	1	1	1	1.39296	1
1374445_at	Gpr162	G protein-coupled receptor 162	1	1	1	1	1	1	1	1	1	1	-5.54177	1	1	1	1	1	1	1	1
1373874_at	Sgpp1	sphingosine-1-phosphate phosphatase 1	1	1	1	1	1	1	-1.4925	1	1	-2.40575	1	-2.64362	-1.87724	1	-1.30881	1	1	1	1
1368227_at	Slc28a2	solute carrier family 28 (sodium-coupled nucleoside transporter), member 2	1	1	1	1	1	1	1	-1.85417	-1.75265	-2.02021	-3.71175	-3.35984	1	1	1	1	1	1	-1.48376
1373964_at	LOC100174910	glutaredoxin-like protein	1	1	-2.48634	1	1	-1.94959	1	1	1	-4.3654	1	-6.9603	1	1	1	1	1	1	1
1373499_at	Gas5	growth arrest specific 5	1	1	1	-2.16577	-2.18623	-3.26001	1	1	1	-4.15399	-3.87599	-4.4929	1	1	1	1	1	1	1
1389172_at	Enh		-1.48822	-1.55557	-1.52586	1	1	1	-1.37137	-1.42748	1	-3.80671	-4.87172	-5.28378	-1.95133	-1.52117	-1.30957	-1.44369	1	1	1
1393012_at	RGD1560636	similar to novel protein	1	1	1	1	1	1	1	1	1	-4.04344	1	1	1	1	1	1	1	1	1
1387055_at	Nae1	NEDD8 activating enzyme E1 subunit 1	-1.67018	1	-1.91945	1	1	1	1	1	1	-6.50093	-3.83529	-3.82112	1	1	-1.80596	1	1	1	1
1379558_at	LOC680200	similar to zinc finger protein 748 isoform 2	1	1	1	1	1	1	1	1	1	-2.86587	1	-2.88381	1	1	1	1	1	1	1
1368117_at	Gphn	gephyrin	-2.17093	-2.21417	-2.42631	1	1	1	-1.54254	1	1	-8.39746	-8.36302	-9.89534	-1.73801	-1.61616	-1.36558	-1.30717	-1.32556	-1.24322	-1.52309
1379637_at	RGD1562639	similar to c-myc promoter binding protein	1	1	1	1	1	1	1	1	1	-3.30973	-10.3873	-6.96543	1	1	1	1	1	1	1
1376554_at	Rnf139_predicted		1	1	1	-3.02699	-2.46789	-2.49866	1	1	1	-2.68915	1	-3.4681	-2.66307	-2.10293	1	1	1	1	1
1384198_at	Enox2	ecto-NOX disulfide-thiol exchanger 2	1	1	1	1	1	1	1	1	1	-3.41552	1	-5.62932	-3.14219	1	1	1	1	1	1
1368779_a_at	Gucy1b2	guanylate cyclase 1, soluble, beta 2	-2.52829	1	1	1	1	1	1	1	1	-2.631	1	-4.82089	-3.51731	-2.41521	1	1	1	1	1
1376371_at	1376371_at		1	1	1	-2.09848	1	1	1	1	1	-2.44336	1	-4.2103	1	1	1	1	1	1	1
1384053_at	Ube4a	ubiquitination factor E4A, UFD2 homolog (S. cerevisiae)	1	1	1	1	1	1	1	1	1	-2.6639	1	-2.70061	1	1	1	1	1	1	1
1368778_at	Slc6a6	solute carrier family 6 (neurotransmitter transporter, taurine), member 6	1	1	1	1	1	1	1	1	-3.85325	1	1	-5.16184	1	1	1	1	1	1	1
1393302_at	1393302_at		-2.37847	-1.99893	1	1	1	-6.57641	1	-8.92216	1	-2.27297	1	-2.79211	-4.91919	1	-4.16412	1	1	1	2.70301
1382474_at	Col13a1	collagen, type XIII, alpha 1	1	1	1	1	1	1	1	-2.81231	1	1	1	-2.89277	1	1	1	1	1	1	1
1390454_at	Nipsnap1	4-nitrophenylphosphatase domain and non-neuronal SNAP25-like protein homolog 1 (C. elegans)	1	-1.29801	-1.51967	1	1	-1.29521	-2.28661	-1.98962	-1.94397	-1.97917	-2.16482	-2.32921	-3.49528	-2.09753	-1.66438	-1.82236	-1.98658	-2.08386	-1.85228
1368021_at	Adh1	alcohol dehydrogenase 1 (class I)	1	1	1	-1.29491	1	-1.18467	-2.67328	-2.78954	-1.98235	-2.28456	-3.84141	-2.68044	-3.65147	-1.53132	-1.68462	-1.76331	-1.94079	-1.65395	-2.2602
1375560_at	Npl2	similar to RIKEN cDNA 0610010D20	1	1	1	1	1	1	-4.18516	-2.71276	1	-2.92941	1	-3.56212	-7.50905	1	-1.62851	-1.7571	1	-1.76961	-1.96204
1388731_at	Zadh2	zinc binding alcohol dehydrogenase, domain containing 2	-1.41032	1	1	1	1	-1.38951	-3.62245	-2.36352	-3.38161	-2.69531	-2.85542	-2.92128	-2.92647	-2.63278	-1.96873	-2.02719	-1.69263	-2.20755	-1.90599
1373673_at	1373673_at		1	-1.34835	-1.25002	1	1	1	-2.19422	-1.53154	-1.67443	-2.28503	-3.04522	-2.58336	-2.185	-2.02619	-1.90057	-2.19652	-1.70818	-1.69611	-3.16463
1395973_at	RGD1309871_predicted		1	1	1	1	1	1	-2.00474	-2.00058	1	-2.07922	-2.32339	-2.64009	-2.82895	-2.01445	1	-2.17131	-1.57348	1	-3.63255
1378027_at	Pvrl3	poliovirus receptor-related 3	1	-1.37862	1	1	1	1	-1.82916	-1.72686	-1.64805	-2.41659	-1.88737	-2.43316	-2.50332	-2.06	-2.00342	-2.22122	-1.96759	-1.47966	-2.60277
1390172_at	Dhtkd1	dehydrogenase E1 and transketolase domain containing 1	1	-1.35745	-1.22591	1	1	1	-2.05992	-1.6485	-2.00361	-1.89952	-2.12175	-2.16964	-2.72148	-1.48232	-1.71923	-2.1086	-2.20078	-1.59504	-2.65851
1397917_at	1397917_at		1	1	-1.38252	-1.48841	1	-1.32726	-1.69814	-1.5537	-1.71168	-1.91237	-2.01566	-2.37162	-2.58722	-1.6468	-1.57123	1	-1.55941	-1.75634	-3.75707
1368943_at	Rnase4	ribonuclease, RNase A family 4	-1.23948	1	-1.1904	-1.13635	1	1	-2.41754	-1.99147	-1.5343	-2.0813	-3.1573	-2.78667	-2.60154	-1.4814	-2.50139	-1.92783	-2.0988	-1.44449	-2.14433
1368215_at	Tpp1	tripeptidyl peptidase I	1	1	1	1	1	1	-2.26838	-2.52683	-2.03996	-2.12362	-2.23933	-2.1305	-2.99289	-2.35933	-1.75427	-1.85094	-1.82939	-1.64954	-2.2802
1384797_at	Atl3	similar to RIKEN cDNA 5730596K20	1	1	1	1	1	1	-1.78579	-2.03938	-1.75065	-2.17568	-2.15601	-2.43011	-2.89722	-2.02119	-1.51955	-2.08495	1	-1.53708	-2.12278
1384407_at	Nmral1	NmrA-like family domain containing 1	1	1	1	1	1	1	1	-2.17599	1	-2.60573	1	-3.85173	-2.5696	1	1	1	1	1	1
1373785_at	Pld4	phospholipase D family, member 4	1	1	1	1	1	1	1	1	-2.41623	-2.69166	1	1	-5.95739	1	-2.46592	1	-2.58169	1	1
1369986_at	Hagh	hydroxyacyl glutathione hydrolase	1	-1.26821	-1.23071	-1.14504	1	-1.21546	-1.83757	-1.98431	-1.46333	-2.22381	-2.09646	-1.68938	-2.60428	-2.42463	-1.94208	-2.56676	-1.98183	-1.95921	-1.97316
1377660_at	RGD1309350	similar to transthyretin (4L369)	-1.35251	-1.40082	-1.25161	1	1	1	-1.71811	-1.52953	-1.72401	-2.94158	-2.85239	-2.0741	-3.47828	-1.85877	-2.20606	-1.83347	-1.45491	-2.07356	1
1388320_at	Spint2	serine protease inhibitor, Kunitz type 2	1	1	1	1	1	1	-2.11956	1	1	-1.97993	-2.15963	-2.13762	-2.89394	-2.07148	-1.95291	-2.42819	1	1	1
1387295_at	Slc6a12	solute carrier family 6 (neurotransmitter transporter, betaine/GABA), member 12	1	1	1	1	1	1	1	1	-2.22971	-2.35867	1	-2.25178	-2.78635	-2.29901	-2.72169	-2.22188	1	1	-2.13964
1370320_at	Pbld	phenazine biosynthesis-like protein domain containing	1	1	1	1	1	1	-2.51193	-1.76636	-2.04263	-2.34362	-2.79058	-2.46771	-3.88926	-1.99331	-1.92234	-2.00434	-1.86696	-1.91428	-2.1323
1388537_at	Nipsnap1	4-nitrophenylphosphatase domain and non-neuronal SNAP25-like protein homolog 1 (C. elegans)	-1.22489	-1.26465	-1.50703	1	1	1	-2.06694	-1.63226	-1.80775	-1.91651	-2.31509	-2.10184	-2.67918	-1.88499	-1.98994	-1.93277	-2.07963	-1.98068	-2.14942
1378605_at	Sigirr	single immunoglobulin and toll-interleukin 1 receptor (TIR) domain	1	1	-1.66853	1	1	1	-1.84821	1	1	-1.83171	1	-2.19342	-2.60649	-2.12936	-1.91371	-2.26941	1	-2.31366	1
1391021_at	Cgnl1	cingulin-like 1	1	1	1	1	1	1	1	1	1	-3.83473	1	-5.15337	1	1	1	1	1	1	-3.33711
1377254_a_at	Cohh1	Cohen syndrome homolog 1	1	-2.38502	1	1	1	-2.19644	1	1	1	-5.37011	-4.25902	-7.37902	-2.23901	-2.02662	-1.59423	-1.79142	1	-1.58307	-2.31826
1387901_at	Ptprs	protein tyrosine phosphatase, receptor type, D	1	1	1	1	1	1	-1.99987	1	1	-3.98683	1	-4.11683	-2.11526	-2.90425	1	-2.21419	-1.65815	-1.74975	-2.63222
1374765_at	Bdh1		1	1	1	1	-1.77254	-1.56785	-2.3614	-1.80465	-2.30403	-3.09612	-3.23686	-2.5953	-3.27595	-2.892	-2.09661	-1.81133	-2.02223	-1.64732	-2.62993
1367720_at	Alad	aminolevulinate, delta-, dehydratase	-1.51109	1	1	1	1	1	-1.76535	-2.06292	-1.59321	-3.29727	-6.60667	-2.42398	-3.66292	-2.59575	-1.80795	-1.86778	-1.61711	-2.13541	-1.80164
1398911_at	Mrpl2	mitochondrial ribosomal protein L2	1	1	1	1	1	1	1	1	1	-4.87186	1	-5.15313	1	1	-2.19212	1	1	1	1
1383064_at	1383064_at		1	1	1	1	1	1	-1.99686	-1.87666	-1.7358	-2.48207	-3.41364	-2.63441	-1.92066	-1.91956	-1.52094	-1.55737	-1.8738	-1.65715	-2.27376
1368409_at	Gstt2	glutathione S-transferase, theta 2	-1.41465	1	1	1	-1.78898	1	-1.6964	-2.17979	-1.66454	-3.49526	-5.25386	-2.90422	-2.78148	-2.32206	-1.54192	-1.45295	-1.92277	1	-2.18429
1395354_at	Lancl1	lanC (bacterial lantibiotic synthetase component C)-like 1	1	1	1	1	1	1	-2.31557	-2.02038	1	-2.21853	1	-2.93448	-1.93874	-2.71847	1	-1.79	-2.7695	-2.87128	1
1370563_at	Akr1c14	aldo-keto reductase family 1, member C14	1	1	1	1	1	1.2168	-3.20302	-2.23004	-2.65334	-2.92484	-2.87877	-2.44904	-2.57009	-1.69184	-2.03454	-1.98292	-1.79625	-2.84134	-2.33878
1387314_at	Sult1b1	sulfotransferase family 1B, member 1	1	1.20762	1.13471	1.3231	1.1695	1.31388	-2.88746	-2.86487	-3.22515	-2.99751	-3.94358	-2.12168	-1.53324	-1.30472	-1.32895	-1.53873	-1.64083	-2.15226	-2.23623
1387178_a_at	Cbs	cystathionine beta synthase	1	1	1	1.49059	1.68977	1	-3.34704	-2.29984	-3.67139	-2.72099	-2.48012	-2.27297	-1.84478	1	-1.82228	-2.15165	-2.12207	-1.62709	-1.55801
1384532_at	Capn5		1	1	1	1	1	1	-2.98479	1	1	-3.10155	1	1	1	1	1	1	1	1	1
1376652_at	C1qa	complement component 1, q subcomponent, alpha polypeptide	1	1	1	-1.74118	1	1	-7.25654	-2.59128	-3.12156	-2.36609	-10.0122	-2.87797	-3.42585	-2.6728	-2.09057	-2.35604	-1.79487	-1.56698	-1.83171
1372316_at	Sgk493	similar to AI115348 protein	1	1	1	1	1	1	-2.44968	-1.89461	-1.9737	-2.05974	1	-3.82655	-1.67394	-1.59444	1	-1.76762	1	1	1
1373773_at	Gpm6a	glycoprotein m6a	1	1	1	1	1	1	-2.30067	-4.65514	-2.41517	-3.39347	-2.82116	-3.70311	1	-2.28667	-2.26697	1	1	-2.615	1
1384370_at	Mthfs	5, 10-methenyltetrahydrofolate synthetase	1	1	1	1	1	1	1	-2.69971	1	1	1	1	1	1	1	1	1	1	1
1382219_at	RGD1307509	similar to RIKEN cDNA 1700108L22	1	1	1	1	1	1	-2.29463	-2.3574	-2.04551	-3.37436	-6.51507	-2.24778	-2.85492	-2.56474	-1.62884	-1.7673	-1.56136	-1.74755	-1.80186
1387052_at	Gpt	glutamic-pyruvate transaminase (alanine aminotransferase)	1	1	1	1	1	1	-2.35819	-2.08756	-4.49026	-1.81165	-3.13931	-1.98002	-2.12336	-1.95371	1	-2.50745	-1.62064	-1.84949	-1.47512
1371763_at	RGD1309534	similar to RIKEN cDNA 4931406C07	1	1	1	1	1	1	-2.45287	-2.09419	-1.92435	-1.88641	-3.469	-2.44957	-2.59551	1	-1.47685	-2.65227	-2.59713	-1.6426	-2.18483
1370200_at	Glud1	glutamate dehydrogenase 1	1	1	-1.23042	1.22267	1	1.26975	-2.64086	-2.60727	-2.32787	-2.09676	-2.60925	-2.2328	-1.69289	1	-1.66446	-1.83395	-1.8067	-1.79701	-2.32757
1367829_at	Echs1	enoyl Coenzyme A hydratase, short chain, 1, mitochondrial	1	1	-1.66325	1	1	1	-2.29782	-2.34951	-2.28548	-1.79451	-3.05124	-2.14529	1	1	-1.5191	-1.91103	-2.32675	-1.84475	-1.81697
1376455_at	Mfsd3	major facilitator superfamily domain containing 3	1	1	1	1	1	1	-2.43877	-1.7277	-2.03838	-2.76945	1	-2.45384	-2.17685	-1.8603	1	1	-1.82212	1	1
1370808_at	Cyb5r3	cytochrome b5 reductase 3	1	1	1	1	1	1	-2.22856	-2.0522	-1.8314	-1.7526	-2.44986	-2.21686	-2.10316	-2.03485	-2.22722	-1.82923	-2.63719	1	-1.77474
1369827_at	Clstn3	calsyntenin 3	1	1	1	1	1	1	-3.10095	1	1	-2.41894	1	1	1	1	1	1	1	1	1
1378819_at	Aspdh	similar to RIKEN cDNA 0610012D14	-1.57131	1	-1.48701	1	1	1	-2.11858	-1.81127	-2.16456	-2.09098	-2.49624	-1.44246	-2.89357	-1.76331	1	-1.75186	-1.81196	1	1
1372170_at	Acy1	aminoacylase 1	-1.28863	1	-1.31629	1	1	1	-2.15215	-1.87216	-2.43547	-2.02927	-2.50881	-2.03889	-1.93741	-1.86723	-1.79695	-1.87913	-1.68203	-2.02022	-1.81386
1388917_at	Myo1d	myosin ID	1	-1.31409	1	1	1	1	-1.96312	-1.79844	-1.86857	-1.95337	-3.55392	-1.99151	-1.88646	-1.88008	-1.66255	-1.603	-1.92803	-1.66556	-2.13066
1370881_at	Tst	thiosulfate sulfurtransferase, mitochondrial	-1.23805	-1.19788	-1.45563	1	1	1	-1.79688	-1.71704	-1.73948	-1.7923	-2.33635	-1.82469	-2.1012	-1.65782	-1.36548	-1.84668	-1.84966	-1.57383	-1.7526
1379904_at	Trappc6a	similar to trafficking protein particle complex 6A /// trafficking protein particle complex 6A	1	1	1	1	1	1	-2.32341	1	1	1	-2.56264	1	-2.1724	1	1	1	1	1	1
1388153_at	Acsl1	acyl-CoA synthetase long-chain family member 1	1	1	-1.15041	1	1	1	-2.15775	-2.10636	-2.26304	-1.95884	-2.08454	-2.13465	-1.96349	-1.52287	-1.61005	-1.65881	-1.62457	-1.38459	-2.33062
1370678_s_at	Maoa	monoamine oxidase A	1	1	1	1	1	1	-1.71244	-2.00092	-2.02824	-2.0842	-2.08465	-2.25954	-1.70435	-1.79036	1	-1.49771	-1.52245	-1.48108	-2.90382
1367673_at	Selenbp1	selenium binding protein 1	1	-1.30383	-1.43443	1	1	1	-3.44443	-2.30151	-2.5655	-2.07404	-3.34314	-2.34444	-2.71872	-2.04842	-2.15752	-2.01851	-2.16068	-1.69046	-2.5892
1379862_at	LOC362419	similar to CG33331-PA	1	1	1	1	1	1	1	1	1	1	1	1	1	1	-2.95053	1	1	1	1
1369050_at	Pik3c2g	phosphatidylinositol 3-kinase, C2 domain containing, gamma polypeptide	1	1	-1.51605	1	1	1	-3.89276	-2.36066	-3.26842	-1.94813	-1.95426	-2.50975	1	-1.77616	-1.94869	1	-1.79413	-1.72613	-2.08097
1370375_at	Gls2	glutaminase 2 (liver, mitochondrial)	-1.42148	1	-1.8555	1	1	-1.40363	-2.89294	-2.6023	-2.90719	-2.12631	-2.90341	-2.654	-2.48373	-2.11221	-1.53133	-1.94019	-1.94248	-1.49192	-2.38319
1394020_at	1394020_at		1	-1.25943	1	1	1	1	-3.38658	-2.36396	-2.08403	-1.88336	-2.48551	-2.15547	-2.71564	-2.16367	-1.90014	-1.99773	-1.61287	-1.63723	-1.9771
1398612_at	Akr1c12	aldo-keto reductase family 1, member C12	1	1	-1.62335	1	1	1	-3.64978	-2.04633	-3.60313	-3.27816	-2.09862	1	-7.48218	1	-2.25891	-1.58592	-3.24205	1	-1.82368
1376731_at	Pign_predicted		1	1	1	1	1	1	-3.68586	-2.84898	-1.73715	-2.53826	1	-2.4282	-3.01352	-2.41044	1	-1.85765	-2.19307	1	-2.85861
1367698_a_at	40430	septin 9	-1.30694	-1.38481	-1.49946	-1.32341	-1.33575	-1.32741	-1.39066	1	1	-2.76614	-4.17938	-2.9172	-2.16234	-1.69669	-2.98336	-2.2363	-1.85476	-1.79659	-2.18332
1393350_at	Nr3c2		1	1	1	1	1	1	1	1	1	-2.35138	1	1	-2.01271	1	-2.35249	1	-2.4611	1	1
1394327_at	RGD1564804	similar to chromosome 1 open reading frame 50	1	1	1	1	1	1	-1.86376	1	1	-2.70228	1	-2.19081	-3.92303	1	-2.8885	-2.47068	-1.60619	-2.09828	-2.31034
1389739_at	Neurl2	neuralized-like 2 (Drosophila)	-1.70177	1	1	1	1	1	-1.94453	1	1	-2.45714	1	-1.85973	1	-1.80179	-1.98764	1	1	1	-2.1627
1368476_at	Nr3c2	nuclear receptor subfamily 3, group C, member 2	1	1	1	1	1	1	1	1	1	1	1	1	1	1	-2.59505	-2.66929	1	-2.52849	1
1372571_at	40239	membrane-associated ring finger (C3HC4) 2	1	1	1	1	-1.39179	1	-1.52482	1	-1.56348	-2.24064	-3.02714	-1.95516	-1.81899	-1.82005	-2.09826	-2.25419	-2.04091	-1.60007	-2.14222
1388639_at	Bcas3	Breast carcinoma amplified sequence 3	1	1	1	1	1	1	1	1	1	-2.20998	1	-2.14762	1	1	-2.24278	-2.02136	-1.76333	-2.20344	-2.11997
1387083_at	Ctf1	cardiotrophin 1	1	1	1	1	1	1	1	1	1	-2.52768	1	-2.15902	1	-2.03157	-2.00529	-2.30194	-1.99304	-1.79562	-2.21179
1372617_at	Btbd2	BTB (POZ) domain containing 2	1	1	1	1	1	1	1	1	1	-2.37083	1	-2.39663	1	-1.97862	-3.16748	-3.03742	-3.27416	1	-2.24756
1388478_at	Tbl1x	transducin (beta)-like 1 X-linked	1	-2.18979	-1.54656	1	1	1	-1.92464	-1.33271	-1.64683	-1.5492	-2.89025	-2.17531	-1.57174	-1.30046	-2.49049	-2.92012	-3.4856	-2.00919	-3.1949
1373851_at	1373851_at		1	1	1	1	1	1	1	1	1	-2.24474	1	-2.42186	1	1	-3.27048	-2.68321	-3.20585	1	-4.46622
1383624_at	RGD1565033	similar to hypothetical protein LOC284018 isoform b	1	1	1	1	1	1	1	1	1	-3.34288	1	-2.40273	-1.63797	-1.80509	-2.79617	-2.74381	-3.10523	-2.05249	-2.27483
1374196_at	Lancl1	lanC (bacterial lantibiotic synthetase component C)-like 1	1	1	1	1	1	1	1	1	1	-2.17518	-2.80813	-3.06056	1	1	1	-2.19062	-2.44548	-3.44919	1
1374178_at	Arl5		1	-1.38341	1	1	1	1	1	-1.55385	-1.35777	-1.93144	-2.65175	-2.32903	-1.35436	1	1	-1.91294	-1.94671	-1.82996	-1.91863
1390378_at	1390378_at		-1.39327	-1.59894	-1.56657	1	-1.3753	1	1	1	1	-2.46341	-2.35441	-2.28068	-1.85472	-1.32633	-2.13422	-2.66957	-2.34683	-2.14424	-1.93529
1372164_at	RGD1305793	similar to hypothetical protein FLJ20154	-1.34394	-1.23647	1	1	-1.18123	1	-1.53741	-1.1566	-1.37123	-2.05775	-2.34048	-2.45676	-1.59976	-1.48372	-2.43924	-2.64948	-1.99584	-1.85166	-2.07357
1382121_at	Stim1	stromal interaction molecule 1	1	1	1	1	1	1	1	1	1	-2.33219	-3.46478	-2.08869	1	-1.96579	-2.81562	-2.47	1	-2.32782	1
1372609_at	Ppp2r5d	protein phosphatase 2, regulatory subunit B (B56), delta isoform	1	1	1	1	1	1	1	1	1	-2.25164	1	-2.26544	-1.70909	-1.81499	-2.23272	-2.56019	-2.70056	-2.46211	-2.35227
1388533_at	Ctdsp1	CTD (carboxy-terminal domain, RNA polymerase II, polypeptide A) small phosphatase 1	-1.43255	-1.66806	-1.3653	1	1	1	-1.23302	-1.17578	1	-2.22987	-3.06146	-2.39009	-1.54106	-1.87024	-2.74381	-2.59096	-2.47534	-2.32688	-1.93766
1390027_at	Usp8	ubiquitin specific peptidase 8	1	-1.76828	-1.54205	1	1	1	-1.39636	-1.48896	1	-2.17402	-2.62463	-3.92006	-2.10719	-1.74126	-2.15131	-2.21757	-1.89274	-2.12997	-2.30956
1380695_at	RGD1563515_predicted		1	1	1	1	1	1	1	1	1	-1.9051	-3.063	-3.37483	1	-1.97288	-1.83906	-1.8013	-1.72243	-2.23861	-2.06003
1372548_at	Cry2	cryptochrome 2 (photolyase-like)	1	1	1	1	1	1	-1.84358	1	1	-2.15197	-2.81802	-2.39417	1	1	-2.44588	1	1	-2.13919	1
1372257_at	1372257_at		-1.69243	-1.68722	-1.65211	1	1	1	-1.481	1	1	-2.43053	-2.37294	-2.90054	-1.33929	-1.67918	-2.36606	-2.60866	-2.09052	-1.65967	-2.04959
1398698_at	Clpx		1	1	1	1	1	-2.11251	-1.72141	1	1	-2.51352	1	-2.42039	-1.67963	-1.72619	-1.81547	-2.51067	-2.16511	1	-1.82919
1375847_at	Nudt16	nudix (nucleoside diphosphate linked moiety X)-type motif 16	1	-1.82238	1	1	1	1	1	1	1	-2.82492	-2.71776	-2.46518	1	-1.62997	-2.09929	-2.86189	-2.49691	-1.91204	-1.84715
1389493_at	Abtb1	ankyrin repeat and BTB (POZ) domain containing 1	1	-1.49894	-1.60686	1	1	1	1	1	1	-2.21393	-3.4762	-2.44301	-1.62549	-1.69813	-2.41759	-2.39156	-2.24472	-2.13195	-2.17507
1374039_at	Car14	carbonic anhydrase 14	1	1	1	1	1	1	-2.71385	-2.46795	-2.34494	-1.74661	-4.67324	-1.63178	1	-1.79306	-2.51238	1	1	1	-2.89658
1372199_at	Pink1	PTEN induced putative kinase 1	1	1	1	1	1	1	-2.32137	-1.77249	-2.22784	-2.34425	-4.03171	-2.95186	1	-2.05248	-2.34389	-1.94867	-1.69666	-1.99937	-1.82674
1372996_at	LOC684270	similar to isochorismatase domain containing 2	1	1	1	1	1	1	-1.88065	-1.9337	-1.75619	-2.58813	-2.62392	-2.03979	1	-1.91096	-1.81306	-1.74393	-1.80042	-2.00379	1
1376344_at	Cybrd1		1	1	1	1	1	1	-2.7637	-2.1177	1	-2.08557	1	1	1	-2.03375	-2.5625	1	1	-2.3303	1
1388410_at	Ugp2	UDP-glucose pyrophosphorylase 2	-1.52105	-1.69371	1	-1.29474	-1.72967	-1.34362	-2.31057	-2.46382	-1.9143	-1.9462	-2.62677	-2.07634	-1.2103	-1.69492	-1.97771	-1.66501	-1.81972	1	-2.14627
1388527_at	1388527_at		1	1	1	1	1	1	1	1	1	-2.60293	1	1	1	-2.56821	-3.51598	-2.49643	-4.13804	1	1
1394234_x_at	Iqwd1	IQ motif and WD repeats 1	1	1	1	1	1	1	1	-1.98087	1	-2.20421	1	-3.33338	1	-2.24883	-2.61225	-2.43642	-1.99459	-4.25662	-2.55024
1373909_at	LOC689176	similar to transmembrane protein 64	1	1	1	1	1	1	-1.5658	-1.83366	-1.849	-2.20982	-2.52283	-2.55888	1	-2.08392	-2.26113	-3.0095	-2.00375	-2.761	-2.66509
1373256_at	Chd3	Chromodomain helicase DNA binding protein 3	1	1	1	1	1	1	1	1	1	-2.08666	1	-2.38045	1	1	1	-2.17913	1	-2.1795	-2.51998
1379405_at	Grlf1		1	1	1	1	1	1	1	1	1	-3.39471	1	-3.41585	1	1	1	1	1	1	1
1391885_at	Spata9_predicted		1	1	1	1	1	1	1	1	1	-2.1951	1	-2.27495	1	1	-2.33207	-2.21001	-2.13846	-1.75743	-3.29047
1392057_at	LOC500893	similar to GLI-Kruppel family member GLI4	1	1	1	1	1	1	1	1	1	-2.13917	1	-2.48024	1	1	-2.3563	-2.67384	1	-2.45907	-2.07001
1376448_at	Wdfy1		1	1	1	1	1	1	-2.03421	1	1	-2.92251	1	-3.74994	1	1	-1.92911	-1.85762	-1.77813	-1.83835	-2.18071
1393198_at	LOC366300	hypothetical LOC366300 /// similar to RIKEN cDNA 5330414D10	1	1	1	1	1	1	1	1	1	1	1	1	1	1	1	-3.01666	1	1	1
1382139_at	Rfx7	regulatory factor X domain containing 2 homolog (human)	1	1	1	1	1	1	1	1	1	1	1	-2.46188	1	1	1	-3.10714	1	1	1
1383849_at	Rfx7	regulatory factor X domain containing 2 homolog (human)	1	1	1	1	1	1	1	1	1	-2.28723	1	-2.1679	1	1	1	-2.84519	-5.31255	-2.47215	1
1373065_at	Ptpn18	protein tyrosine phosphatase, non-receptor type 18	1	1	1	1	1	1	-2.38271	-2.55706	1	-2.41546	1	-2.99822	1	1	-2.84701	-2.12441	-1.86617	-1.83576	-1.79733
1398500_at	Gpr116		1	1	1	1	1	1	-2.13057	-1.9444	-1.71343	-2.63266	-1.80101	-2.61343	1	1	-2.36415	-2.02772	-1.98461	-2.17349	-2.19926
1379044_at	RGD1307509	Similar to RIKEN cDNA 1700108L22	1	1	1	1	1	1	1	1	-1.82069	-2.49478	1	-2.31136	1	1	-2.53781	1	-2.66946	-3.44106	1
1384262_at	Ppp1r3b	protein phosphatase 1, regulatory (inhibitor) subunit 3B	1	-1.69344	-2.21483	1	1.21654	1	-2.31866	-1.82324	-1.65682	-3.10036	-3.36228	-2.3016	-1.47342	1	1	-3.85482	-2.39461	-2.28782	-1.93599
1375600_at	Pigo	phosphatidylinositol glycan anchor biosynthesis, class O	1	1	1	1	1	1	1	-2.0079	1	-2.76594	1	-2.2348	1	1	1	1	1	1	1
1395351_at	DLP2		1	1	1	1	1	1	1	1	1	-2.85794	1	1	-1.74833	-1.68716	1	1	1	1	1
1397744_at	Dbh		1	1	-1.92326	1	1	1	-1.85331	1	-1.86953	-2.14311	1	-2.19141	-2.25806	1	-2.63882	1	-3.45858	1	-4.509
1394479_at	Afmid	similar to kynurenine formamidase	-1.76596	1	-2.57959	1.56932	1	1	1	-1.88768	1	-3.29382	-3.45617	-4.68189	-2.89124	1	-1.50107	-2.51337	-4.21478	-1.9335	-2.4564
1386293_at	LOC300126		1	1	1	1	1	1	1	1	1	1	1	-2.23001	1	1	1	-2.35496	-2.30647	-5.2027	-3.02293
1382235_at	RGD1306809	similar to hypothetical protein FLJ30596	-1.3369	-1.36182	-1.3406	1	1	1	1	-1.42106	-1.25502	-2.40239	-2.20314	-2.61381	-2.2096	-2.0382	-2.04096	-2.20927	-2.0444	-2.43097	-2.26684
1367966_at	Dpp3	dipeptidylpeptidase 3 /// similar to Dipeptidyl-peptidase 3 (Dipeptidyl-peptidase III) (DPP III) (Dipeptidyl aminopeptidase III) (Dipeptidyl arylamidase III)	1	1	-1.44022	1	1	1	1	1	1	-3.35714	-4.08339	-2.51535	-2.20176	-1.50224	-2.66216	-2.31575	-2.03916	-2.15957	-1.97493
1383960_at	Pex16	peroxisome biogenesis factor 16	1	1	1	1	1	1	1	1	1	-2.58318	1	-2.83974	1	1	-2.26146	-2.18883	-2.20067	-2.21947	-2.14719
1382986_at	Gpam	glycerol-3-phosphate acyltransferase, mitochondrial	1	1	1	1	1	1	1	1	1	-2.29588	-3.12457	-2.82314	-1.95853	-2.24984	-3.84021	-2.62527	-2.57928	-3.24306	-3.3989
1398606_at	Golim4	golgi integral membrane protein 4	1	1	1	1	1	1	1	-1.51699	1	-2.23435	-2.63224	-2.91358	-1.5405	-2.03544	-1.71053	-2.06245	-2.19954	-1.90447	-2.49048
1374943_at	RGD1311378	similar to RIKEN cDNA 2010011I20	1	1	-1.80247	1	1	1	1	1	1	-2.33204	-3.36863	-3.85411	-1.82903	1	1	-2.51812	-2.85164	1	-2.73288
1368091_at	Oplah	5-oxoprolinase (ATP-hydrolysing)	1	1	1	1	1	1	1	-1.44716	1	-2.46585	-2.60484	-2.07573	-2.06972	-1.7333	-1.86789	-2.64303	-2.73309	-1.68677	-2.52381
1388396_at	Stk25	serine/threonine kinase 25 (STE20 homolog, yeast)	1	1	1	1	1	1	1	-2.56522	1	1	-4.34588	-3.10703	-2.11124	1	1	1	-2.19938	1	-4.43283
1367889_at	Camk1	calcium/calmodulin-dependent protein kinase I	1	-2.12735	1	1	1	1	1	1	1	-3.98086	1	-6.26936	-2.54192	1	-2.01899	-1.81819	-2.11364	-1.82016	-2.28939
1376660_at	1376660_at		-1.46187	-1.36337	-1.3161	1	1	-1.31579	-1.53493	-1.34596	1	-2.75994	-3.03404	-3.1675	-1.80699	-1.49104	-2.40911	-2.2576	-1.8491	-1.98197	-2.35228
1382013_at	Cap2		-1.3708	1	-1.71209	1	1	-1.29118	1	-1.36884	1	-2.39019	-2.6504	-2.45351	-2.27292	-1.89526	-2.06528	-2.20817	-2.11797	-2.06728	-2.1732
1373625_at	Shmt1	serine hydroxymethyltransferase 1 (soluble)	-1.33152	-1.53425	-1.4066	1	1	1	-1.40541	-1.33291	-1.30099	-2.38494	-2.27336	-2.29672	-2.13372	-1.57344	-1.62863	-1.8522	-1.7445	-1.94329	-2.08399
1393847_at	Nkiras1	NFKB inhibitor interacting Ras-like protein 1	1	1	1	1	1	1	1	1	1	1	1	-3.60744	1	1	1	1	1	1	-2.9113
1373662_at	Tor2a	torsin family 2, member A	1	1	1	1	1	1	1	1	1	-2.56584	-2.0599	-2.61574	-1.78635	-1.64605	-1.98122	-2.02225	-2.13589	-1.92003	-2.16198
1372523_at	Gclc	glutamate-cysteine ligase, catalytic subunit	-1.32761	-1.53165	-1.30425	1	1	1	-1.55428	-1.68777	-1.58521	-2.33324	-3.20733	-2.62151	-2.32483	-1.98572	-1.65886	-1.81637	-2.40675	-2.44035	-2.69614
1371807_at	RGD1311605	similar to apoptosis related protein APR-3; p18 protein	1	1	1	1	1	1	-2.0598	-2.01341	-1.87822	-2.21261	-5.90506	-2.03215	-2.12633	-1.56398	-2.15019	-1.94565	-1.96151	-1.81122	-1.595
1371612_at	Tsen34	tRNA splicing endonuclease 34 homolog (SEN34, S. cerevisiae)	1	1	1	1	1	1	1	1	1	-2.96843	-3.10228	-2.82028	-1.51374	-1.82964	-2.02743	-2.09952	-1.81391	-1.63521	-1.59418
1370045_at	Polg	polymerase (DNA directed), gamma	-1.25031	-1.46693	1	1	1	1	-1.68763	-1.39808	-1.53704	-2.47205	-2.26635	-2.51275	-1.98843	-1.60546	-2.34163	-1.87761	-1.61714	-1.95575	-1.63562
1379473_at	RGD1307509	similar to RIKEN cDNA 1700108L22	1	1	1	1	1	1	-1.81742	-1.55228	-1.82991	-3.22643	-2.99437	-2.89951	-1.62177	-1.53715	-1.894	-1.81647	-1.65296	-1.80697	-1.82816
1391359_at	Pik3c2g		1	1	1	1	1	1	1	1	1	-2.47007	1	-2.65024	-2.14878	1	1	-2.0144	1	-1.98679	-2.49159
1389048_at	Bmp1	bone morphogenetic protein 1	1	-1.49453	1	1	1	1	-1.80619	-1.40071	-1.92996	-2.7366	-3.07103	-2.75547	-1.68611	-1.75508	-1.91269	-1.87393	-1.5785	-1.56227	-1.81576
1371727_at	Glb1	galactosidase, beta 1	1	1	1	1	1	1	-2.26228	-1.72982	-1.74623	-2.17442	-4.27627	-2.37689	-1.95184	-1.84116	-2.32597	1	-1.85416	1	-2.19769
1370435_a_at	Nudt6	nudix (nucleoside diphosphate linked moiety X)-type motif 6	1	1	1	1	1	1	1	1	1	1	-4.81595	1	1	1	1	1	1	1	-2.23226
1372780_at	Tmem53	transmembrane protein 53	1	1	1	1	1	1	-1.87563	-1.54315	1	-3.20319	-5.12501	-3.39964	-2.43595	-1.7539	-1.77575	-2.00485	-1.89822	-1.56229	-1.66363
1392485_at	RGD1564804	similar to chromosome 1 open reading frame 50	1	1	1	1	1	1	1	1	1	-3.84571	-5.68337	-4.17587	-2.58756	1	-2.77811	-1.97044	1	-1.81925	-1.95524
1371956_at	LOC683077	similar to praja1, RING-H2 motif containing	-1.33909	-1.58351	1	1	-1.42241	1	-1.73439	-1.64519	-1.62253	-3.05397	-4.50098	-3.07097	-2.0738	-2.09773	-2.38712	-1.43094	-1.59868	1	-2.24393
1392499_at	Pfas	phosphoribosylformylglycinamidine synthase (FGAR amidotransferase)	1	1	1	1	1	1	1	1	1	-3.62903	1	-6.31841	1	1	-2.46513	1	1	1	1
1373507_at	Acbd5	Acyl-Coenzyme A binding domain containing 5	-1.24344	-1.28772	-1.26353	-1.30074	-1.32429	-1.38911	-1.78726	-1.66549	-1.45399	-2.46516	-3.8395	-2.87579	-1.98209	-1.90599	-2.06246	-2.12563	-1.84651	-1.55561	-2.48861
1372774_at	Coq6	Coenzyme Q6 homolog (yeast)	1	1	1	1	1	1	1	1	1	-2.62308	-1.69703	-3.15559	-1.98115	-2.13826	-2.08497	-1.90187	-1.56968	-1.29389	-2.37388
1389549_at	Prosc	proline synthetase co-transcribed	-1.37113	1	1	1	1	1	1	-1.55008	1	-3.34533	-4.13133	-3.47305	-1.37479	1	-1.78499	-1.8033	-2.09446	-1.97188	-2.02657
1389154_at	Lias	lipoic acid synthetase	1	1	1	1	1	1	1	-1.66958	-2.19834	-2.63869	-13.2348	-2.67335	-1.59963	-1.53313	-1.61818	1	-1.69949	-2.03969	-1.75206
1390421_at	RGD1310475	Similar to RIKEN cDNA 0610010D20	1	1	-1.34134	1	1	1	-1.77922	-1.82128	-1.67765	-2.85755	-4.14575	-2.22134	-1.98581	1	-1.82082	-1.54038	-2.3466	-1.96295	-2.31125
1387913_at	Cyp2d4v1	cytochrome P450, family 2, subfamily d, polypeptide 4	1	1	1	1	1	1	1	1	-2.89413	1	1	1	1	1	1	1	1	1	1
1390783_at	Abca8a	ATP-binding cassette, sub-family A (ABC1), member 8a	1	1	1	-2.03325	1	1	-2.28732	1	1	-2.3627	-7.12328	-3.88151	1	-1.98563	-1.91349	-2.16784	-2.27776	-1.53206	-2.17376
1372951_at	1372951_at		1	1	1	1	1	1	1	1	1	-2.06569	-2.85507	-3.07997	-1.74492	1	-1.94138	-2.77396	-1.98927	1	-1.87704
1372563_at	RGD1308143	similar to D330021B20 protein	1	1	1	1	1	1	-1.5836	-1.67358	-1.36667	-2.28452	-3.41893	-2.2679	-1.99183	-1.7977	-1.7153	-2.20138	-1.59409	-1.78385	-2.13662
1371913_at	Tgfbi	transforming growth factor, beta induced	-1.27835	-1.34734	-1.32391	-1.23437	-1.31715	-1.40912	-1.58874	-1.18319	-1.16997	-1.95869	-2.46772	-2.31472	-2.12553	-1.50505	-1.92712	-2.09379	-1.66095	-1.59009	-2.09715
1372762_at	Hddc3	HD domain containing 3	1	1	-1.68082	1	1	1	-2.11498	1	-2.72801	-2.14218	1	-2.04614	-1.66626	-1.82559	1	1	-2.09518	1	1
1374272_at	LOC679383	similar to DNA segment, Chr 5, ERATO Doi 135, expressed	1	1	1	1	1	1	-1.72506	1	1	-2.56416	1	-2.61611	-2.02747	1	-1.70534	-1.98591	-2.22499	-1.61365	-1.75558
1373846_at	RGD1561589	basic transcription factor 3-like 4	1	1	1	1	1	1	-1.46744	-1.37567	-1.55367	-2.26541	-2.81558	-2.28407	-1.701	-1.39251	-1.86887	-1.81405	-1.86057	-1.82527	-1.92268
1384368_at	Slc25a16	solute carrier family 25 (mitochondrial carrier, Graves disease autoantigen), member 16	1	-1.34675	1	1	1	1	-1.53315	-1.37638	-1.3107	-2.4649	-2.65784	-2.42847	-1.65824	-1.38062	-1.59856	-1.87989	-1.83849	-1.6949	-2.60139
1374524_at	Scly	selenocysteine lyase	1	1	1	1	1	1	-1.62262	-1.8559	1	-2.16353	-2.26653	-2.49023	-2.95753	-1.89434	-1.55722	-1.70908	-1.70302	-1.6537	-1.59486
1378014_at	LOC64038	Sertolin	1	1	1	1	1	1	1	1	1	1	1	-3.18653	1	1	1	1	1	1	-2.27531
1373465_at	Pqlc1	PQ loop repeat containing 1	1	1	1	1	1	1	-1.86136	-1.42175	-1.49239	-2.73797	-3.32537	-2.58425	-1.82516	-1.46583	-1.65169	-1.55022	-1.84092	-1.45755	-2.06673
1371475_at	Rnase4	ribonuclease, RNase A family 4	-1.16968	1	1	1	1	1	-1.78875	-1.48718	-1.26973	-1.75485	-2.35845	-2.43821	-2.02116	-1.33535	-1.94993	-1.51317	-1.69893	-1.2364	-1.92212
1394283_at	Luc7l2_predicted		1	1	-1.44761	1	1	-1.48795	-1.64657	-1.71626	-1.57544	-2.24045	-1.94345	-2.265	-1.87715	-1.59003	-1.45295	-1.75832	-1.53389	1	-2.511
1382809_at	Cirbp	cold inducible RNA binding protein	1	1	-2.17378	1	1	1	-2.10697	-2.37478	1	-3.08881	-10.6515	-2.63397	1	1	1	1	1	1	1
1390388_at	Fech	ferrochelatase	1	1	1	1	1	1	-1.78889	-1.66303	1	-3.33232	-9.31867	-3.09046	1	1	1	-1.97297	-1.97275	1	-1.81679
1382935_at	RGD735029	SEL1 domain containing protein RGD735029	1	1	1	1	1	1	1	1	1	-3.16895	-3.62819	-3.69615	1	-1.67717	1	1	-2.92144	-2.06866	1
1390237_at	Timm8a1	translocase of inner mitochondrial membrane 8 homolog a1 (yeast)	1	1	1	1	1	1	-2.05304	-1.77994	-2.07049	-2.37392	1	-2.54952	1	1	-1.45313	1	-2.84335	1	-2.93172
1373797_at	Hyal3	hyaluronoglucosaminidase 3	-1.5699	1	1	1	1	1	-1.66484	-2.12	1	-2.48751	-4.12571	-3.29916	1	-2.08042	1	1	1	1	-1.99372
1389805_at	1389805_at		1	1	1	1	1	1	1	1	1	1	1	1	1	1	1	1	1	-3.26159	1
1376581_at	RGD1309138	similar to hypothetical protein MGC9912	1	1	1	1	1	1	1	1	1	-2.80395	1	-2.78156	-2.29387	1	-1.88686	1	1	-2.10001	-1.91667
1370537_at	Xrcc6	X-ray repair complementing defective repair in Chinese hamster cells 6	1	1	1	1	1	1	1	1	1	-2.4187	1	-2.92992	-2.27656	-2.26314	1	1	1	-3.26073	-2.58129
1388692_at	Alkbh7	alkB, alkylation repair homolog 7 (E. coli)	1	1	1	1	1	1	-2.09286	-1.77748	1	-2.52224	-3.19601	-3.06393	1	-2.22595	-2.30277	1	-1.92776	-2.07513	-1.75514
1385374_at	Tef		1	1	1	1	1	1	1	1	1	1	1	-3.82475	1	1	1	1	1	1	-4.21013
1382490_at	LOC301113		1	1	1	1	1	1	1	1	1	1	1	1	1	1	1	-2.07026	-3.23729	-2.0199	-2.70538
1387966_at	Asrgl1	asparaginase like 1	1	1	-3.66342	1	1	-4.14398	1	1	1	1	1	1	1	-4.09359	-2.59269	-4.32191	1	-2.05995	-3.36711
1377653_at	LOC366669	similar to mKIAA1011 protein	-2.00337	-2.14606	-2.5623	-1.79905	1	-1.88305	1	1	1	-2.4096	-3.62036	-4.48812	1	-2.64347	-2.29489	-2.74167	-1.52666	-1.80092	-2.65608
1389567_at	Scap	SREBF chaperone	-1.67899	1	1	1	1	1	-1.8034	1	1	-2.46658	1	-2.99112	-2.06476	-2.54444	-2.23084	-2.18182	-1.59379	-1.66503	-1.69592
1382060_at	1382060_at		-1.28169	-1.63079	-1.42814	-1.51496	1	1	-1.81105	-1.462	-1.30097	-2.12231	-2.11215	-2.32028	-2.52059	-2.34009	-1.67115	-2.11966	-1.66345	-1.64077	-1.95376
1383059_a_at	Gkap1	G kinase anchoring protein 1	-1.65194	1	-1.7364	1	1	1	1	1	1	-1.96622	1	-2.17071	1	-1.78497	-2.92077	-3.11856	-2.66913	-3.13797	1
1384565_at	LOC362557		1	1	1	1	1	1	1	1	1	1	1	1	1	1	-2.25195	-2.59079	1	-2.27572	-2.52923
1368422_at	Meox2	mesenchyme homeobox 2	1	1	1	1	1	1	-3.35144	1	1	-3.56587	1	-5.68676	1	1	1	-2.63139	1	-2.47051	1
1369063_at	Anp32a	acidic (leucine-rich) nuclear phosphoprotein 32 family, member A	-2.91997	-2.38917	-2.10685	-2.05053	1	-2.56493	-2.19927	1	-2.84799	-2.92736	1	-2.90844	1	-2.8902	-2.28811	-1.95076	-1.8862	-2.48295	-1.74012
1380241_a_at	Lrp5	low density lipoprotein receptor-related protein 5	1	1	1	1	1	1	1	1	-4.29738	1	1	1	1	-10.9413	1	1	1	1	1
1385247_at	Ugt2b	UDP glycosyltransferase 2 family, polypeptide B	-54.1562	1	-1.60344	1	-20.7438	1	-100	-100	-2.61374	-57.4828	-28.2531	-2.73263	-1.59489	-100	1	-2.61785	-1.84072	-1.87587	-98.3757
1387825_at	Ugt2b	UDP glycosyltransferase 2 family, polypeptide B	-17.7214	-1.42482	1	1	-5.76774	1	-13.0089	-41.6228	1	-8.69069	-35.5351	1	1	-26.5519	1	-1.2873	1	1	-22.4475
1368915_at	Kmo	kynurenine 3-monooxygenase (kynurenine 3-hydroxylase)	-1.50916	-1.62418	-1.8335	-1.77236	1	-2.23184	-3.28251	-3.02609	-2.85125	-1.75749	-2.16827	-2.12344	-6.3734	-2.90281	-1.70778	-2.54919	-1.86723	-1.77574	-1.96318
1388602_at	Cfd	complement factor D (adipsin)	1	1	1	1	1	1	-8.98425	-3.49318	-3.68629	1	-12.8094	1	1	1	1	1	1	1	1
1370036_at	Suox	sulfite oxidase	-1.36789	-1.49985	1	1	1	-1.37438	-3.08505	-2.70219	-3.01346	-1.92707	-3.50629	-1.94452	-2.53123	-2.36849	-1.55414	-1.54242	-1.543	-1.58039	-1.64046
1371012_at	Hacl1	2-hydroxyacyl-CoA lyase 1	1.46268	1	1	1	1	1	-5.12139	-4.6501	-3.7883	-3.15792	-3.55468	-1.60062	-4.44715	-1.55868	-3.04277	-1.54496	-1.86306	-1.32209	-1.53665
1377145_at	RGD1562101	G protein-coupled receptor 98	1	1	1	1	1	1	1	-4.39289	-3.09079	1	1	1	1	1	1	1	1	1	1
1389248_at	Galk1	galactokinase 1	1	1	1	1	1	1	1	1	-2.76031	1	-6.63903	1	-7.39866	-2.5489	1	1	1	-2.64014	1
1373110_at	Gng10		1	1	1	1	1	1	-4.70651	1	-4.31744	-2.29313	-4.36147	-5.48222	1	-2.78927	1	1	1	1	-3.24051
1384628_at	Iyd	iodotyrosine deiodinase	1	1	-2.64485	1	1	1	-2.62376	-3.19505	-3.28856	1	1	-2.72847	-3.24692	-2.25216	1	-2.1197	-2.7183	-1.46444	-3.83404
1368064_a_at	Ddc	dopa decarboxylase	1	1	-2.48917	1	1	1	-4.51003	-3.5553	-3.65417	-3.30951	-3.32109	-3.89869	-3.04094	-2.86686	1	1	-4.13232	1	-2.14067
1396303_at	Rabac1		1	1	1	1	1	1	1	1	-7.7678	1	1	-6.49104	-9.49487	1	1	1	1	1	1
1371854_at	Prp2		1	-1.27686	1	-1.57433	-1.88996	-2.23064	-2.858	-2.98321	-2.07535	-3.54392	-3.45278	-3.34179	-2.48395	-4.57347	-1.92247	-1.6139	-1.32483	-1.55904	-1.75181
1375056_at	LOC289589		-1.9365	-2.78457	1	1	-1.94038	1	-2.64218	-2.25689	-2.42141	-3.09784	-4.68253	-3.25551	-4.20874	-2.01478	-1.57499	1	-1.86691	-2.11308	-1.67305
1369187_a_at	Ptger3	prostaglandin E receptor 3 (subtype EP3)	1	-1.85856	-1.74988	1	-1.86939	1	-2.66281	-2.97015	-2.23828	-2.71493	-4.10664	-2.74576	-2.86645	-2.63239	1	1	1	1	1
1376619_at	RGD1561090	similar to protein tyrosine phosphatase, receptor type, D	-1.71166	-1.76275	-1.66585	-1.77113	1	-1.62152	-5.07754	-4.21193	-3.68317	-4.58212	-4.592	-6.09695	-5.35971	-3.88093	1	-1.67257	-1.31791	1	-1.96612
1374591_at	RGD1561090	similar to protein tyrosine phosphatase, receptor type, D	-1.5183	-1.54243	-1.58599	-1.32526	1	-1.37287	-4.41351	-3.28994	-3.11454	-3.71468	-5.96454	-3.62713	-4.03574	-2.49757	-1.30953	-1.75539	-1.533	-1.18837	-1.57104
1394570_at	Xk	Kell blood group precursor (McLeod phenotype) homolog	1	1	1	1	1	1	1	1	1	-9.70303	1	1	1	1	-2.57527	-2.70915	1	1	1
1391435_at	Pltp	phospholipid transfer protein	1	1	1	-4.57251	1	1	-6.82321	-4.50534	-6.43981	-2.3797	-7.66224	-4.34663	-4.11683	-4.24703	-2.65433	-2.09655	1	1	1
1384110_at	LOC366608		1	1	1	1	1	1	-2.8426	-1.99125	-2.21466	-3.25797	-9.45789	-4.62316	1	-3.36897	1	1	1	-2.00002	-2.46591
1381871_at	LOC500261		1	1	-1.35598	1	1	1	-2.58098	-2.3949	-2.07943	-3.45336	-2.47414	-3.13126	-2.77104	-2.51959	1	1	1	1	1
1392044_at	1392044_at		1	1	1	1	1	-1.25568	-2.77169	-2.3814	-2.39054	-3.92904	-3.46454	-5.71091	-1.44482	-2.73327	1	-1.35987	-1.5168	1	-1.55371
1368265_at	Cyp2t1	cytochrome P450 monooxygenase CYP2T1	1	1	1	-1.75666	1	-1.72196	-3.50093	-2.32367	-3.04798	-3.18417	-3.59018	-3.1	-5.10015	-2.97075	-1.73125	1	1	1	1
1370081_a_at	Vegfa	vascular endothelial growth factor A	1	1	1	1	1	-2.50201	-2.09629	-1.93883	1	-3.6128	1	-6.68048	-2.53205	-3.72626	1	1	1	1	1
1393777_at	1393777_at		1	1	1	1	1	1	-2.5	1	1	-3.97569	1	-2.7486	-3.69207	-3.04507	1	1	1	1	1
1375924_at	Fabp12		1	1	1	1	1	1	-3.38398	-2.17732	-2.18356	-2.69473	1	-2.21688	-4.43458	-2.67188	-1.86813	-2.624	1	1	1
1381311_at	Emr1	EGF-like module containing, mucin-like, hormone receptor-like sequence 1	1	-1.73502	1	-2.0835	-1.69212	1	-3.43264	-2.08408	-3.16214	-2.00555	1	-2.44771	-2.85082	-1.95345	-1.55661	-1.39844	-1.59793	1	-1.65335
1390510_at	Ms4a6b	membrane-spanning 4-domains, subfamily A, member 6B	1	1	1	-1.83899	1	1	-3.06078	-2.05619	-2.09679	-2.33139	-4.0063	-2.86677	-2.21677	-1.94098	-1.78268	-1.70675	1	1	1
1371251_at	Galt	galactose-1-phosphate uridyl transferase	-1.41725	-1.74084	-1.35315	-1.57269	-1.57392	-1.40322	-1.76195	-1.65996	-2.18253	-2.86333	-4.34487	-2.40416	-2.57963	-1.86577	-1.43277	-1.44312	1	-1.61945	1
1377060_at	Mccc2	methylcrotonoyl-Coenzyme A carboxylase 2 (beta)	1	1	-1.65358	1	1	1	-2.47768	-2.25139	-2.11732	-2.17253	-3.25078	-2.05737	-1.71859	-1.60171	-1.32328	-1.3646	-1.43456	-1.36092	-1.60967
1370699_a_at	Egfr	epidermal growth factor receptor /// peptidase D	1	1	1	1	1	1	-1.9196	-2.06628	-2.00958	-2.50948	-2.89409	-2.71262	-2.14221	-2.19322	1	1	1	1	1
1385038_at	Hhip	Hedgehog-interacting protein	1	1	1	1	1	1	-2.5348	-3.28967	1	-2.60587	1	-2.42164	-2.86207	-2.61902	1	1	1	1	1
1388251_at	Prkci	protein kinase C, iota	1	1	1	1	1	1	-2.43105	1	1	-2.67003	1	-2.83761	-2.41116	1	1	1	1	1	1
1376747_at	LOC500261		1	1	1	1	1	1	-2.37534	-1.82061	-1.8338	-2.3612	1	-2.80361	-2.75044	-2.40374	1	1	1	1	1
1397226_at	LOC366608		1	1	1	1	1	1	-2.7258	-2.73559	1	1	1	1	1	-3.7238	1	1	1	1	1
1375506_at	Adck5	aarF domain containing kinase 5	1	1	1	1	1	1	-3.74022	-1.9285	-2.35843	-3.58819	1	-2.42439	-2.89756	-2.37663	-1.71639	1	1	-2.16636	1
1395374_at	Ptgfr		1	1	1	1	1	1	-1.99519	-1.80235	1	-3.09574	1	-2.66903	-2.95167	-2.76186	1	-1.80781	1	1	1
1370047_at	Enpp1	ectonucleotide pyrophosphatase/phosphodiesterase 1	1	1	1	1	1	-1.70082	-2.158	-2.07234	1	-1.99602	1	-2.2548	-3.33317	1	1	-1.59415	1	-1.33398	-1.86307
1373134_at	Fahd2a	fumarylacetoacetate hydrolase domain containing 2A	1	1	1	1	1	1	-1.8031	1	-1.83914	-1.989	1	-1.93513	-2.47036	-2.03077	1	-1.3591	1	1	-1.84665
1369570_at	Sult2a1	sulfotransferase family 2A, dehydroepiandrosterone (DHEA)-preferring, member 1	1	1	1	1	1	1	1	-3.27266	1	-3.11238	1	1	-2.43275	-2.45187	1	1	1	1	1
1370420_at	Srd5a1	steroid 5 alpha-reductase 1	-2.26225	-1.68667	-1.4944	-1.71324	1	-1.60747	-2.93447	1	-3.82084	-2.19502	-1.9855	-3.47216	-3.78377	-2.44643	1	-2.10123	-1.53337	1	-1.6956
1369746_a_at	Slco1b2	solute carrier organic anion transporter family, member 1b2	-1.32428	-1.40925	-1.46751	-1.39567	1	-1.43022	-2.49906	-2.10105	-2.91934	-2.31088	-1.42155	-1.69195	-3.01065	-1.94341	-1.93864	-1.58343	-1.35415	-1.44491	-1.66475
1378190_at	Rbl2		1	1	1	1	1	1	1	1	1	-2.90334	1	1	-4.00713	1	1	1	1	1	1
1370789_a_at	Prlr	prolactin receptor	1	1	-1.78521	-2.6752	1	1	-2.97584	1	-3.39645	-3.08612	1	-2.75316	-3.50567	-2.33823	-2.55956	1	1	-1.70972	-2.94274
1396851_at	1396851_at		1	1	1	1	1	1	1	1	-3.12269	1	1	1	-4.95228	-3.0402	1	1	1	1	1
1369671_at	Otc	ornithine transcarbamylase	1	-1.3571	-1.63716	1	1	1	-2.19871	-2.21038	-2.2815	-1.52034	-1.65643	-1.95022	-2.44655	-1.74023	1	-1.5995	-2.19751	1	-2.30842
1387223_at	Aadat	aminoadipate aminotransferase	1	1	1	1	1	1	-2.36835	-2.74733	-2.51933	-1.81579	-2.04416	-2.00011	-3.37009	-2.1238	1	-1.44226	-1.66732	-1.75767	-1.58284
1376713_at	Mta1	metastasis associated 1	1	1	1	1	1	1	1	1	-4.00365	1	1	1	1	1	1	1	1	1	1
1372306_at	Ethe1	ethylmalonic encephalopathy 1	1	1	-3.2889	1	1	1	-3.04597	-1.95981	-3.67318	-1.90375	-6.52153	-3.13528	-2.2405	-1.82345	-1.32381	-2.05192	-1.83085	1	-1.44019
1374552_at	1374552_at		1	1	1	1	1	1	1	1	1	-11.8174	1	-11.7691	-3.48824	1	1	1	1	1	1
1385793_at	LOC301113		1	1	-6.9708	1	1	1	1	1	1	1	1	1	1	1	1	1	1	1	1
1377045_at	1377045_at		1	1	1	1	1	-2.66602	-2.84376	1	1	-3.6096	-10.1067	-3.67718	-2.97145	1	1	1	1	1	1
1374432_at	Alcam		-1.81729	-2.73875	-2.18844	-1.43538	-1.30947	-1.44629	-2.24471	-1.96721	-2.7372	-3.45922	-3.88962	-3.07551	-2.8418	-2.34891	1	-1.72007	1	1	-1.67622
1383139_at	rnf141		-1.49875	-1.86199	-1.59917	-1.85042	-1.70317	-2.00378	-1.99979	-1.52543	-1.60558	-3.3194	-3.86971	-5.02587	-2.53543	-2.44719	-2.26737	-1.7586	-1.26213	1	-1.51163
1376427_a_at	Gldc	glycine decarboxylase	1	-2.176	-2.48001	1	1	1	-3.41961	-2.04564	-3.51085	-3.94072	-5.45865	-5.47125	-3.86837	-2.35825	1	1	1	1	1
1386274_at	Slc17a2	solute carrier family 17 (sodium phosphate), member 2	-1.51387	-1.77603	1	-1.67387	-1.86266	-1.91086	-1.8017	-1.5104	-1.60639	-5.10239	-3.36426	-2.67281	-4.6972	-1.96203	-1.30527	-1.42385	1	-1.25321	-1.47548
1377457_a_at	Sorl1	sortilin-related receptor, LDLR class A repeats-containing	1	-3.66666	1	1	1	1	-3.67453	1	-4.10293	1	1	1	1	1	1	1	1	1	1
1398524_at	RGD1562220_predicted		1	1	1	1	1	1	-4.87615	1	1	1	1	1	1	1	1	1	1	1	1
1371014_at	Plcb1	phospholipase C, beta 1	1	1	1	1	1	1	-3.50293	-5.26189	-5.23907	-6.43665	-20.891	-4.70183	-3.83742	-3.68386	1	1	1	1	1
1387959_at	Aspg	lysophospholipase	1	1	1	1	1.54247	1	-2.73362	1	1	-10.8576	-3.33225	-12.2339	-2.24746	1	1	1	-1.27407	1	-1.38702
1373243_at	Pmvk	phosphomevalonate kinase	1	-2.89453	-2.85926	1	1	1	1	1	1	-8.82161	-5.90235	-5.0042	1	-3.50317	1	1	1	1	-4.08956
1385043_at	Inadl	similar to channel-interacting PDZ domain protein isoform 1 (predicted)	1	1	1	1	1	1	1	1	1	-6.87135	1	-10.2764	1	1	1	1	1	1	1
1393224_at	1393224_at		1	1	1	1	1	1	-2.11193	1	1	-3.23568	-4.18583	-4.77397	-2.10881	-2.3773	1	-1.983	1	1	-1.69979
1373729_at	Atpaf1	ATP synthase mitochondrial F1 complex assembly factor 1	1	1	1	1	1	1	1	1	-1.81782	-2.70283	-2.56581	-3.1247	1	-1.73187	1	1	1	1	-1.66801
1388825_at	1388825_at		1	-1.58033	1	1	1	1	-1.95527	-1.68119	-1.8423	-1.99121	-5.36425	-2.57399	1	-1.87147	-1.32723	1	1	1	-1.71366
1394849_at	Zbtb20	zinc finger and BTB domain containing 20	1	1	1	1	1	1	-2.47676	-2.8979	-2.67214	-2.21382	1	-3.5059	-2.86026	-2.55565	1	1	1	1	1
1379578_at	Zbtb20	zinc finger and BTB domain containing 20	1	1	1	1	1	1	-2.07604	-2.76563	-1.77496	-2.08706	-4.91555	-3.31562	-1.86484	-2.05429	1	-1.33724	-1.47772	1	-1.5619
1393917_at	Cd163	CD163 molecule	1	1	1	-2.13827	1	1	-4.00413	-2.63904	-3.06168	-3.70588	-3.67699	-5.61206	-2.13054	-2.36582	1	1	1	1	1
1370043_at	Alcam	activated leukocyte cell adhesion molecule	-1.51262	-1.56918	-1.43389	1	1	1	-2.00097	-1.44824	-2.34274	-2.45576	-2.37651	-2.2881	-1.96208	-2.43161	1	-1.35266	1	-1.21067	-1.50128
1385165_at	Cyp39a1	cytochrome P450, family 39, subfamily a, polypeptide 1	1	1	1	-1.72203	1	1	1	-2.32266	-1.90562	-2.4268	-2.37419	-2.0233	-2.10561	-1.946	1	1	1	1	1
1382524_at	Zbtb20	zinc finger and BTB domain containing 20	1	1	1	1	1	1	-1.79147	-2.79993	-2.1773	-2.47209	-2.45659	-3.95416	-2.46342	-2.39623	1	1	1	1	1
1372305_at	Copz2	coatomer protein complex, subunit zeta 2	1	1	1	1	1	1	1	1	1	1	1	1	-2.59936	-2.57154	1	1	1	1	1
1376256_at	Wdfy1	WD repeat and FYVE domain containing 1	1	1	1	1	1	1	1	1	1	-3.00695	1	-2.38361	1	1	1	1	1	1	1
1371667_at	Fam20b	family with sequence similarity 20, member B	1	1	1	1	1	1	1	1	-1.83126	-1.83245	1	1	1	1	1	1	1	1	1
1379260_at	Heca	headcase homolog (Drosophila)	1	1	1	1	1	1	-2.25856	1	1	-2.99797	-2.89388	-4.58682	1	1	1	-1.44338	1	1	1
1380347_at	1380347_at		1	1	1	1	1	1	-2.81615	1	1	-2.31865	1	-2.47603	-2.00226	-1.90838	1	1	1	1	1
1389601_at	Nfib		1	-1.36391	-1.28475	-1.37735	-1.49055	-1.50719	-1.77577	-1.60998	-1.73157	-3.05259	-2.2388	-2.55447	-1.94793	-2.32409	1	-1.3852	-1.45567	1	-1.60447
1389483_at	Dpy19l1	Dpy-19-like 1 (C. elegans)	1	1	1	1	1	1	-1.92734	1	-1.69128	-2.19896	-2.39009	-2.62415	1	-1.68931	1	1	1	1	-1.56718
1371591_at	Mrps18a	mitochondrial ribosomal protein S18A	1	1	1	1	1	1	1	1	1	-2.33042	-4.40282	-2.14112	1	1	1	1	1	1	1
1369654_at	Prkaa2	protein kinase, AMP-activated, alpha 2 catalytic subunit	1	1	1	1	-1.8035	1	-1.94536	-2.70266	1	-2.26172	1	-2.57924	-3.33124	1	1	1	1	1	1
1385709_x_at	Ank		1	1	1	1	1	1	1	-2.90343	1	-2.72821	1	-2.62563	1	1	1	1	1	1	1
1397245_at	Rad23a	RAD23a homolog (S. cerevisiae)	1	1	1	1	1	1	-2.08272	-3.24969	-2.33061	-2.17484	1	-2.80663	1	1	1	1	1	-2.4383	1
1372760_at	LOC499304		1	1	-1.87259	-4.82762	-2.15233	-2.08161	1	-2.51566	-2.35727	-3.05706	-9.69775	-5.77358	1	-1.76552	1	-2.16359	1	1	-1.92507
1389986_at	LOC499304		1	1	1	-1.82118	-2.39474	-1.45266	1	-2.53569	-2.26348	-2.42614	-2.58433	-2.7397	-2.89127	-1.81093	3.7	1	1	1	1
1374692_at	Snx14	sorting nexin 14	1	1	-2.15743	1	1	-1.72945	-2.37477	-1.84149	1	-4.04163	-6.70992	-5.47046	-1.82573	1	1	1	1	1	1
1370806_at	Retsat	retinol saturase (all trans retinol 13,14 reductase)	1	1.25412	-2.47685	1	-1.22367	-3.00584	-1.26234	-4.05577	-1.41577	-3.42434	-3.42104	-2.65497	-1.49523	-1.40959	1.36384	1	-3.36676	1	1
1388511_at	Centd2	centaurin, delta 2	1	-1.53548	-2.1163	-1.71212	1	-1.6154	-1.52009	1	-1.51894	-2.15798	1	-2.68845	-2.42225	-2.19656	-1.40437	1	1	1	1
1370491_a_at	Hdc	histidine decarboxylase	1	1	1	1	1	1	1	1	1	1	1	1	1	-2.7662	1	1	1	1	1
1393261_at	LOC691318		-1.92857	1	-1.99798	1	1	-1.90564	1	1	1	-2.08067	1	-3.25743	-2.0639	-2.55867	1	1	1	1	1
1382691_at	Sf3b1	Splicing factor 3b, subunit 1	1	1	1	1	1	1	1	1	1	1	1	1	-2.17572	1	1	1	1	1	1
1384166_a_at	1384166_a_at		1	1	1	1	1	1	1	1	1	1	1	1	-2.22985	1	1	1	1	1	1
1375452_at	Ctage5	CTAGE family, member 5	1	1	1	1	1	1	1	1	-1.48547	-1.7843	-1.82273	-1.95413	-2.38397	-1.65476	-1.25885	-1.34816	1	1	-1.51612
1382294_at	Alcam		1	-2.35351	1	1	1	1	-1.80226	-1.69003	-2.26943	-1.88883	1	-2.30817	-2.05894	-2.24929	1	1	1	1	-1.74871
1393939_at	rnf141		1	1	1	1	1	1	1	1	1	-2.76247	1	-2.49848	-3.19117	1	1	1	1	1	1
1384391_at	Rdh10	retinol dehydrogenase 10 (all-trans)	-1.53392	-1.71539	-1.48043	1	1	1	-1.86786	-1.76031	-1.43233	-2.43035	-2.49979	-2.38167	-2.69726	-2.10284	1	1	1	1	-1.30046
1393351_at	Rdh10	Retinol dehydrogenase 10 (all-trans)	-1.55161	-2.02446	-1.62149	-1.26073	-1.21236	1	-1.72953	-1.64052	-1.58633	-2.57722	-3.6103	-2.71854	-2.43414	-2.33004	-1.18502	1	1	1	-1.99483
1384380_at	Zcchc7_predicted		-2.3171	1	1	-2.79976	1	-3.7135	1	-2.55521	1	-2.20859	1	1	-2.56095	1	1	1	1	1	1
1396901_at	RGD1566319_predicted		1	1	1	1	1	1	-2.96281	1	1	1	1	1	-2.59845	1	1	1	1	1	1
1396323_at	LOC681383	similar to Protein C10orf11 homolog	1	1	1	1	1	1	-3.00653	1	1	-3.68075	1	1	-3.25817	-3.8629	1	1	1	1	1
1389189_at	Actn1	actinin, alpha 1	1	1	1	-4.07617	1	-2.22401	1	1	1	1	1	-2.58976	1	1	1	1	1	1	1
1372849_at	Dnaja2		1	1	1	1	1	1	1	1	1	-3.72032	1	-4.06016	1	1	1	1	1	1	1
1398759_at	Tsc22d1	TSC22 domain family, member 1	-1.9642	-2.60968	-3.22716	-2.43317	-2.42734	-2.12062	-2.21898	-2.01496	-2.19259	-2.72907	-2.55951	-2.90846	1.80719	-2.81381	1	1	1	1.93461	1
1382749_at	Rbm5	RNA binding motif protein 5	1	1	1	1	1	1	-1.92062	1	-1.71517	-1.98692	1	-1.86922	1	-1.5959	1	1	1	1	1
1374190_at	Clybl	citrate lyase beta like	1	1	1	-2.23142	1	1	1	1	-2.4695	1	-4.46644	-2.90653	1	-2.67967	1	1	1	1	1
1388611_at	Tcea3	transcription elongation factor A (SII), 3	1	1	1	1	1	1	1	1	1	1	1	-2.65739	1	-2.74261	1	1	1	1	1
1387061_at	Jup	junction plakoglobin	1	1	1	1	1	1	1	1	1	-6.80825	-8.68373	-9.37728	1	1	1	1	1	1	1
1371819_at	Hdac5	histone deacetylase 5	1	1	1	1	1	1	1	1	1	-2.10877	1	-2.42601	1	-1.90503	1	1.82764	1	1	1
1384179_at	1384179_at		1	-1.9468	1	1	1	-1.99251	1	1	1	-1.99708	1	-2.32974	1	1	1.59753	1	1	1	1
1388742_at	1388742_at		1	1	1	1	1	1	1	1	1	1	1	1	1	1	1	1	1.90067	1	1
1378531_at	1378531_at		1	1	1	1	1	1	1	1	1	-4.75591	-6.56413	1	1	1	1	1	1	1	1
1377341_at	RGD1305455	similar to hypothetical protein FLJ10925	1	1	1	1	1	1	1	1	1	1	-7.15941	-3.68715	1	1	1	1	1	1	1
1389229_at	Acpl2	acid phosphatase-like 2	-1.37526	-1.71514	-1.73998	-1.43443	-1.35487	1	-1.92386	1	1	-3.49226	-4.34629	-3.09404	-2.28093	-1.83418	1	1	1	1	1
1391860_at	1391860_at		1	1	1	1	1	1	1	1	1	1	1	-5.19533	1	1	1	1	1	1	1
1371707_at	Tnpo2	transportin 2 (importin 3, karyopherin beta 2b)	1	1	1	1	1	1	1	1	1	1	1	-2.51355	1	1	1	1	1	1	1
1376575_at	Twsg1	twisted gastrulation homolog 1 (Drosophila)	1	1	1	1	1	1	1	-1.65312	1	-2.92197	-3.84627	-3.88698	1	1	1	1	1	1	-1.42754
1388337_at	Np	nucleoside phosphorylase	1	-1.39425	-1.36762	1	1	1	-1.36764	-1.43487	-1.34564	-1.70565	-2.62085	-1.93884	-1.71087	1	1	-1.18407	1	1.37803	1
1373105_at	Tmed1	transmembrane emp24 domain containing 1	1	-9.08756	1	1	1	1	1	1	1	-9.74014	-8.29583	-9.19769	1	1	1	1	1	1	1
1369493_at	Prlr	prolactin receptor	1	1	-2.77022	-3.11759	1	1	-3.05488	1	-3.81004	-3.55529	1	-3.99302	-2.92823	-2.5048	1	1	1	1	1
1372365_at	Rin2	Ras and Rab interactor 2	1	1	1	-3.70613	-3.37897	-2.93371	-3.587	-2.19195	-2.7912	-6.27773	1	-5.67074	-2.30875	-3.12255	1	1	1.85881	2.07192	1
1397249_at	LOC685433		1	1	1	1	1	1	-5.71125	1	1	1	1	1	1	1	1	1	1	1	1
1377516_at	Odz2		1	-7.14208	1	1	1	1	1	1	1	1	1	1	1	1	1	1	1	1	1
1367733_at	Car2	carbonic anhydrase II	1	-2.47108	1	-2.11789	1	-3.01836	-3.82967	-3.46983	-3.03949	-2.63031	1	-3.46174	-4.18902	-4.0782	1	1	1	1	1
1377079_a_at	Ppox	protoporphyrinogen oxidase	1	1	1	1	1	1	1	1	1	1	1	-8.5399	1	1	1	1	1	1	1
1368569_at	Akr1b7	aldo-keto reductase family 1, member B7	-3.27786	-4.00299	1	-14.9843	-6.53822	-6.22526	-2.66011	1	-5.05345	-5.54185	-1.82154	-5.31948	-8.94478	-11.9496	1	1	2.77398	1	1
1368509_at	Bbs2	Bardet-Biedl syndrome 2 homolog (human)	1	1	1	1	-1.68924	1	1	1	1	-2.05626	1	-2.86181	1	1	-3.13018	-2.99454	-2.11845	-2.82197	-3.19658
1382843_at	Sgpl1	sphingosine phosphate lyase 1	1	1	1	1	1	1	1	1	1	1	1	-2.06418	-2.18925	1	-3.31262	-2.48779	-1.89582	-2.87687	-2.89813
1367796_at	Mgat1	mannoside acetylglucosaminyltransferase 1	1	-1.32464	1	-1.33732	1	1	1	-1.32455	1	-1.68712	1	-2.14415	-1.99483	-1.59588	-3.0637	-2.86642	-2.71681	-2.9242	-3.96173
1367775_at	Amacr	alpha-methylacyl-CoA racemase	-1.22978	1	-1.24892	-1.39686	1	-1.32892	-1.3505	1	1	-2.53883	-1.4716	-1.54697	-2.34057	-1.41363	-1.87614	-3.26539	-3.32402	-2.1981	-3.57971
1388998_at	Epb4.9	erythrocyte protein band 4.9	1	1	1	1	1	1	1	1	1	1	1	1	1	1	-4.61405	1	-7.60429	1	1
1372598_at	RGD1309651	similar to 1190005I06Rik protein	1	1	1	1	1	1	1	1	1	1	1	1	1	1	-3.04305	-3.0461	-3.31164	1	-2.66609
1379759_at	Carkd	similar to RIKEN cDNA 0710008K08	1	1	1	1	1	1	1	1	1	1	1	1	1	1	1	-4.72948	-3.71649	-3.01723	1
1372871_at	RGD735175	hypothetical protein MGC:72616	1	1	1	1	1	1	-1.68197	1	1	1	1	-1.84881	1	1	-3.08775	-4.12848	-2.89737	-4.22858	-2.79309
1379815_at	LOC679869	similar to Transcription factor 7-like 2 (HMG box transcription factor 4) (T-cell-specific transcription factor 4) (TCF-4) (hTCF-4)	1	1	1	1	1	-1.54146	-1.60899	1	1	-1.90678	-5.32429	-1.88345	-1.49406	-1.54175	-2.36642	-1.93939	-2.33383	-2.10811	-2.03296
1395146_at	Adipor2	adiponectin receptor 2	1	1	1	1	1	1	1	1	1	1	1	1	1	1	-2.14754	1	-2.21606	-2.60807	-2.88259
1379590_at	Zrsr1	zinc finger (CCCH type), RNA binding motif and serine/arginine rich 1	1	1	1	1	1	1	1	1	1	1	1	-2.48294	1	1	-2.12426	-1.89044	-2.62906	-3.70895	-2.07497
1389182_at	RGD1311269	similar to hypothetical protein FLJ37953	1	1	1	1	1	1	1	1	1	1	1	1	1	1	1	1	-2.21027	-2.63047	1
1379439_at	Zbtb44	zinc finger and BTB domain containing 44	1	1	1	1	-1.3972	-1.38343	-1.39376	-1.48675	-1.51948	1	1	-1.37346	-1.34121	-1.49461	-2.01832	-1.86674	-2.10284	-2.88586	-1.91684
1390157_at	1390157_at		1	1	1	-1.57335	1	-1.35142	-1.37785	1	1	-1.3063	1	-1.71481	-1.77149	-1.63612	-2.40608	-2.08839	-1.82473	-2.49351	-2.05585
1372180_at	Sdc3	syndecan 3	1	1	1	1	1	1	-1.83449	1	1	1	1	-1.88542	1	1	-2.34497	-2.05694	1	-2.9183	-2.47923
1376704_a_at	Ndnl2	necdin-like 2	1	1	1	1	1	1	1	1	1	-1.80588	1	-1.84406	1	1	1	1	-1.82165	1	-2.93649
1374987_at	Pank3_predicted		1	1	1	1	1	1	1	1	-1.39525	-1.75352	-1.74912	-1.84733	1	-1.62949	-2.23022	-2.28325	-2.10252	-2.26156	-1.93261
1391304_at	LOC363188	similar to ubiquitin protein ligase E3 component n-recognin 2	1	1	1	1	1	1	1	1	1	1	1	-2.5972	1	1	1	-2.4981	1	1	-2.66851
1384941_at	Shf	Src homology 2 domain containing F	1	1	1	1	1	1	1	1	1	1	1	1	1	1	-4.07857	1	1	1	1
1371847_at	Crtap	cartilage associated protein	1	1	1	1	1	1	1	1	1	-2.31772	1	-2.1089	1	-1.71901	-2.58805	-2.5945	-2.41142	-2.23719	-1.83862
1393428_at	1393428_at		1	1	1	1	1	1	1	1	1	-2.13743	1	-1.99455	1	1	-2.34518	-2.49648	-2.0702	-1.87977	-2.37848
1375419_at	Lrrc28	leucine rich repeat containing 28	1	-1.51738	1	1	1	1	-1.51339	1	1	-1.67948	1	-1.82279	-1.64715	-1.69633	-2.38214	-2.57219	-2.15569	-2.15496	-2.194
1387616_at	Pdgfc	platelet-derived growth factor, C polypeptide	1	1	1	1	1	1	1	1	1	1	1	-2.08334	-2.69862	1	-2.57992	-2.82457	-2.59828	1	-4.63189
1374060_at	1374060_at		1	1	-1.44434	-1.52535	-1.3946	-1.38249	-1.46225	-1.49352	-1.20733	-1.8135	-2.37996	-1.44662	-1.57323	-1.41038	-2.42334	-3.13416	-3.81714	-1.76357	-2.31778
1372455_at	Tspan12	tetraspanin 12	1	-1.27673	1	1	-1.31191	1	-1.46525	1	1	-3.16319	-1.94448	-2.17537	-1.70762	-1.43207	-2.87932	-2.53723	-2.36262	-2.30261	-2.43868
1382180_at	Cradd	CASP2 and RIPK1 domain containing adaptor with death domain	1	1	1	1	1	1	1	1	-2.18347	-2.13206	1	1	1	-2.04226	-2.31916	-2.30543	-2.10193	-3.98129	1
1371042_at	Map4k3	mitogen-activated protein kinase kinase kinase kinase 3	1	1	1	1	1	-1.87467	1	1	1	1	1	-1.81518	1	-2.14308	-2.2225	-2.55354	-2.12758	-2.08922	-2.14291
1370541_at	Nr1d2	nuclear receptor subfamily 1, group D, member 2	1	1	1	1	-1.56404	1	1	-1.91523	1	-1.8449	-1.58536	-2.00344	1	-1.99862	-2.74366	-2.11308	1	-1.72456	-2.19009
1376285_at	Gulp1	GULP, engulfment adaptor PTB domain containing 1	1	1	1	1	1	1	-1.89862	-1.92546	1	-1.82434	1	-2.40567	1	-2.35882	1	1	1	1	-3.15758
1368146_at	Dusp1	dual specificity phosphatase 1	1	-1.3748	1	1	1	-2.0043	-2.35445	-2.26291	-2.07804	-1.65257	-2.53997	1	1	-2.05021	-2.02893	-2.03447	-2.61662	-1.71153	-2.3494
1393906_at	Fam149a	family with sequence similarity 149, member A	1	1	1	1	1	1	1	-2.29706	1	1	1	1	1	1	1	-2.55082	-2.82324	1	-3.77073
1383654_a_at	Fn3k	fructosamine 3 kinase	1	1	1	1	1	1	1	1	1	-1.62426	1	1	1	-1.61992	-2.66605	-2.42057	1	-4.2313	-4.81684
1372647_at	Prelp		1	1	1	1	1	1	-2.20178	-1.88258	1	-2.84305	-3.38289	-1.86669	1	-1.53962	-2.63005	-1.69809	-3.73127	-1.75297	-2.43405
1371924_at	Olfml3	olfactomedin-like 3	1	1	1	1	1	1	1	1	1	-1.93291	1	1	1	1	-2.13256	-2.19821	-2.34896	-1.92708	-2.37104
1368039_at	Synj2bp	synaptojanin 2 binding protein	1	1	1	1	1	1	1	1	1	1	1	1	1	1	1	1	1	-6.7708	1
1395621_at	RGD1565119	similar to Mitochondrial carrier triple repeat 1	1	1	1	1	1	1	-2.01547	1	1	1	1	1	1	1	-3.00438	-3.52768	-2.28394	-3.00212	-3.30969
1394888_at	Rbms1		1	1	1	1	1	1	1	1	1	1	1	1	1	1	1	1	1	-5.11366	1
1387886_at	Prelp	proline arginine-rich end leucine-rich repeat protein	1	1	1	1	1	1	1	1	1	1	1	1	1	1	-3.70631	-3.14584	-2.67558	-3.51984	-3.42484
1394086_at	Senp7	SUMO1/sentrin specific protease 7	1	1	1	1	1	1	1	1	1	1	1	1	1	1	-3.97914	-5.21058	1	1	1
1371953_at	Ccng2	cyclin G2	1	1	1	1	1	1	1	1	1	1	1	-2.4346	1	1	-3.16814	-3.5401	-1.70378	1	-3.63361
1374990_at	Rpl22		1	1	1	1	1	1	1	1	1	1	1	-2.53931	1	1	-2.53326	-2.11575	-2.4652	-2.53523	-3.42571
1370358_at	Tpcn1	two pore channel 1	1	1	1	1	1	1	-2.05763	1	1	-1.92301	1	1	1	1	-3.01127	-2.65882	-2.81446	-2.28611	-3.10745
1390430_at	Nr1d2		1	1	1	1	-1.48197	1	1	-2.10965	1	-2.33212	-2.01919	-2.64716	1	-1.71025	-3.34494	-2.34694	1	-1.71389	-2.53179
1379724_at	Phldb2	pleckstrin homology-like domain, family B, member 2	1	1	1	1	1	-1.60375	1	1	1	-1.97712	-2.25469	-3.06154	-1.75658	-2.24213	-3.46701	-2.85304	-2.83374	-2.17968	-2.63483
1377939_at	Atg4c	Autophagy-related 4C (yeast)	1	1	1	1	1	1	1	1	1	-1.48857	1	-1.81765	-2.03373	-1.94511	-2.76085	-2.33493	-1.79795	-1.79257	-2.15922
1369942_at	Actn4	actinin alpha 4	1	1	1	1	1	1	1	1	1	-1.88314	-1.52335	-2.17038	-2.03512	-1.67606	-2.27519	-2.13151	-1.84801	-1.90264	-2.43291
1382558_at	Tcf3	transcription factor 3	1	1	1	1	1	1	-1.64255	1	1	-2.19738	1	-1.77615	-2.00491	-1.9183	-2.6185	-2.17721	-1.91476	-2.00291	-1.98055
1372892_at	Znf213	Zinc finger protein 213	1	1	1	1	1	1	1	1	1	1	1	1	-2.28484	-2.19083	-2.41791	-2.63318	1	-2.50763	-2.54852
1390131_at	Srr	serine racemase	-1.2431	1	1	1	1	-1.22115	-1.69408	-1.42571	-1.45168	-2.2921	-2.11217	-1.7627	-2.20648	-1.50513	-2.64022	-2.80629	-2.36424	-2.66967	-2.48002
1387508_at	Baat	bile acid-Coenzyme A: amino acid N-acyltransferase	-1.12535	-1.2392	-1.2793	-1.14109	1	1	-1.50716	-1.36464	-1.25589	-1.85276	-3.57968	-1.80682	-2.34212	-1.82432	-2.4195	-2.89214	-1.56618	-2.24212	-2.07616
1372733_at	RGD1311444_predicted		1	1	1	1	1	1	1	-1.98674	1	-2.72891	-2.08256	1	1	1	-2.01918	-2.22106	-1.62569	-1.98025	-2.12981
1368431_at	Hpn	hepsin	-1.25576	-1.2328	-1.17526	1	1	1	-1.88445	-1.40414	-1.4982	-1.81217	-1.9928	-1.67213	-2.32395	-1.60709	-2.03552	-2.17393	-1.91819	-1.82998	-1.9806
1379315_at	Rassf7	Ras association (RalGDS/AF-6) domain family (N-terminal) member 7	1	1	1	1	1	1	1	1	1	-1.83235	1	-1.72411	-1.92872	-1.75917	-1.93533	-1.77886	-1.82132	-2.77018	-2.17382
1371615_at	Dgat2	diacylglycerol O-acyltransferase 2	-1.235	-1.36694	-1.31926	1	1	1	-1.44365	-1.27632	-1.58873	-1.79262	-1.55465	-2.17673	-1.60117	-1.42075	-1.90133	-1.97313	-1.7512	-2.8826	-1.9025
1375369_at	RGD1305793	similar to hypothetical protein FLJ20154	1	1	1	1	1	1	1	1	1	-1.82395	-2.52342	-2.31236	-1.50236	-1.61874	-2.26828	-2.29699	-1.59994	-1.86759	-2.01173
1393495_at	1393495_at		1	1	1	1	1	1	1	1	1	-1.49741	-2.15941	-1.57532	-1.71218	1	-2.3495	-1.91761	-2.37011	-1.76562	-1.92226
1373765_at	1373765_at		1	1	1	1	1	1	1	1	1	1	1	-2.43686	1	1	-1.8161	-1.87647	-1.72127	-1.56224	-3.06625
1392424_at	1392424_at		1	1	1	1	1	1	-1.65076	-1.62214	-1.3874	-1.82296	-1.91243	-1.86724	-1.70681	-1.33502	-1.9279	-2.07839	-1.64385	-2.07358	-2.80259
1376605_at	Slc17a5	solute carrier family 17 (anion/sugar transporter), member 5	1	1	1	1	1	1	1	1	1	-1.65872	-1.76711	-1.50314	-1.8679	1	-1.9509	-2.28471	-1.82929	-1.75296	-2.57173
1378185_at	Nxt2	nuclear transport factor 2-like export factor 2	1	1	1	1	1	1	1	-1.4079	1	-1.59741	-2.358	-1.44672	-2.00712	1	-1.83567	-2.13392	-1.48169	1	-2.5164
1375016_at	1375016_at		1	1	1	1	1	1	1	1	1	1	1	1	1	1	1	-2.55713	1	1	1
1389487_at	Dnajb12	DnaJ (Hsp40) homolog, subfamily B, member 12	1	1	1	1	1	1	1	1	1	-2.00827	1	-2.02498	-1.91939	-1.69803	1	-1.93935	1	-2.03411	-2.48606
1378972_at	Wwc1	WW, C2 and coiled-coil domain containing 1	1	1	1	1	1	1	1	1	1	1	1	1	-2.15433	-2.15626	1	-2.37779	1	1	1
1389336_at	Pop5	processing of precursor 5, ribonuclease P/MRP family (S. cerevisiae)	1	1	1	1	1	1	1	1	1	-1.53641	1	-1.64156	1	-1.60409	-1.64362	-2.06066	-1.81762	-1.93869	1
1371747_at	RGD1310660	similar to RIKEN cDNA 2700038C09	1	1	1	1	1	1	1	1	1	-1.51779	1	1	-1.95622	-1.60711	-1.73619	-1.83562	-2.56844	-1.98588	-1.78372
1381349_a_at	LOC363188	similar to ubiquitin protein ligase E3 component n-recognin 2	1	1	1	1	1	1	1	1	1	-1.81911	1	-2.23693	1	-1.5603	-1.88482	-1.73191	-1.74361	-1.8805	-1.8202
1369954_at	Idh1	isocitrate dehydrogenase 1 (NADP+), soluble	-1.21812	1	1	-1.23523	-1.23993	1	-1.3782	1	-1.30415	-1.57256	-2.66666	-1.79684	-2.22892	-1.45116	-1.87715	-1.96047	-2.05041	-1.81205	-2.60428
1391387_s_at	Slbp	stem-loop binding protein	1	1	1	1	1	1	1	1	1	1	1	1	1	1	-1.51421	-2.09473	-2.19573	-2.22616	-3.32138
1374396_at	Atp6v1c1	ATPase, H+ transporting, lysosomal V1 subunit C1	1	1	1	1	1	1	1	1	1	-2.15554	1	-2.05146	-1.63341	1	-1.89984	-1.69569	-2.10484	-1.99206	-1.97303
1369424_at	Cyp2a2	cytochrome P450, subfamily 2A, polypeptide 1	1	1	-1.20883	1	-1.27795	-1.23536	-1.506	-1.97615	-1.49131	-1.78066	-2.26921	-1.8962	-2.13638	-1.36355	-2.01318	-1.57262	-1.55687	-1.56289	-2.17008
1390243_at	MGC108974		1	1	1	1	1	1	1	1	1	1	1	1	-2.66322	1	1	1	1	-2.88476	1
1387375_at	Khk	ketohexokinase	-1.20855	1	-1.22069	1	1	1	-1.76975	-1.55852	-1.61923	-1.8666	-2.14334	-1.86107	-2.64283	-1.62675	-1.67399	-2.01784	-1.78454	-1.6508	-2.09469
1371982_at	Dpy30	dpy-30 homolog (C. elegans)	1	1	1	1	1	1	1	1	1	1	1	-2.07077	1	1	-1.75533	-2.00846	-2.44968	-1.66769	1
1386247_at	Snx25	sorting nexin 25	1	1	1	1	1	1	1	1	1	-2.02068	1	1	-1.80046	1	-1.85128	-2.539	-1.85891	1	-1.73
1386876_at	Adcy6	adenylate cyclase 6	1	1	1	1	1	1	1	1	1	-1.7507	1	-1.90592	-1.71299	1	-2.11794	1	-1.9109	1	-2.10398
1373337_at	Grhpr	glyoxylate reductase/hydroxypyruvate reductase	1	-1.19305	-1.21316	1	1	1	-1.34615	-1.26904	-1.38171	-2.71956	-2.05607	-1.89232	-2.57274	-1.56478	-1.6388	-1.89115	-1.83998	-1.69735	-1.79361
1397531_at	1397531_at		1	1	1	1	1	1	1	-1.88995	1	1	1	-2.05059	1	1	1	-2.30396	-1.77215	1	-2.52341
1398512_at	Nfx1	nuclear transcription factor, X-box binding 1	1	1	1	1	1	1	1	1	1	1	1	-2.20762	1	1	-1.57624	-2.04679	-2.09535	-2.04384	-1.91903
1379606_at	Rab30	RAB30, member RAS oncogene family	1	1	1	1	-2.41429	1	-4.5806	-4.94128	1	-6.34606	-4.55515	1	-8.8905	-6.62534	-2.14366	-1.62383	-1.75384	-2.81801	-2.53496
1368784_at	A1cf	APOBEC1 complementation factor	1	1	1	1	-1.89785	1	1	-3.56224	1	1	1	1	-3.60254	1	-1.91908	-2.12009	-1.53658	-2.27184	-1.98314
1382569_at	Paqr9	progestin and adipoQ receptor family member IX	1	1	1	1	1	1	1	1	1	-2.24232	1	1	-2.73298	1	-1.89622	-2.44868	-2.02389	-2.86893	-2.1263
1389844_at	Fkbp4	FK506 binding protein 4	1	1	1	1	1	1	1	1	1	-2.33003	-2.44045	-1.98724	-2.35556	1	-1.75886	-2.43767	-1.97455	-2.91363	-1.41262
1374892_at	Sat2	spermidine/spermine N1-acetyl transferase 2	1	1	1	1	1	1	1	1	-2.74358	1	1	1	1	1	-2.5085	-1.63515	-2.14158	-2.60063	-1.74128
1392643_at	Rab5b	RAB5B, member RAS oncogene family	1	1	1	1	1	1	1	1	1	1	1	1	1	-5.56397	1	1	1	1	1
1376531_at	1376531_at		1	1	1	1	1	1	-2.05407	1	-2.41759	-2.10904	1	-2.0136	1	-2.16659	-3.69814	1	1	1	1
1372613_at	Bdh2	3-hydroxybutyrate dehydrogenase, type 2	1	1	1	1	1	1	1	1	1	1	1	1	1	1	-3.71058	1	1	1	1
1367781_at	Pip	prolactin induced protein	1	1	1	1	1	1	1	1	1	1	1	1	1	1	1	-8.07819	1	1	1
1385670_at	Sdsl	serine dehydratase-like	1	1	1	1	1	1	1	1	-1.79332	1	1	1	-2.03345	1	1	1	-2.39533	1	-2.64822
1392649_at	Fbxo21_predicted		1	1	1	1	1	1	1	1	1	-2.24625	1	1	-2.00312	1	-1.96885	-2.19304	1	1	-3.24976
1374527_at	Echdc2	enoyl Coenzyme A hydratase domain containing 2	1	1	-1.44344	1	1	-1.26156	-1.68128	-1.43211	-1.84855	-1.46591	-2.07502	-1.4415	-1.96397	-1.5186	-1.88611	-1.89696	-2.13398	-1.69415	-1.99722
1378092_at	Mdp-1	magnesium-dependent phosphatase 1	1	1	1	1	1	1	1	1	1	1	1	1	1	1	1	-2.08938	1	1	1
1372277_at	LOC641316	aldehyde dehydrogenase 4 family, member A1	1	1	-1.51399	1	1	1	-1.78819	-1.55307	-1.69975	-1.58234	-1.86396	-1.96011	-2.48654	-2.17535	-1.50089	-1.88463	-2.01504	1	-2.29743
1398961_at	LOC681578	similar to ring finger protein 13	1	1	1	1	1	1	-1.81813	-1.75765	-1.61512	1	1	1	-2.03079	1	-2.18404	-1.81535	-1.90171	-1.64296	-2.03955
1384103_at	RGD1561416	similar to novel protein (HT036)	1	1	1	1	1	1	1	1	1	-2.58832	1	1	-2.91674	-2.00782	-1.72819	-2.07583	-1.98216	1	-1.6823
1380120_at	Mtap7_predicted		1	1	1	1	1	1	-1.75669	1	1	1	1	1	-1.85033	-2.23538	-1.95536	-2.22685	1	-2.2301	-2.67561
1384073_at	Adhfe1	alcohol dehydrogenase, iron containing, 1	1	1	1	1	1	1	-2.59852	-2.38095	-1.79056	-1.87631	1	-1.85128	-2.61968	-2.05723	-1.62253	-1.73771	-1.72375	-1.95957	1
1397624_at	RGD1311909_predicted		1	1	1	1	1	1	1	1	1	1	1	1	1	1	1	-2.36296	1	-2.42083	1
1389659_at	Ctla2a	cytotoxic T lymphocyte-associated protein 2 alpha	1	1	1	1	1	1	-2.19194	-2.09035	-1.96072	-2.03616	1	-1.89646	-1.88549	-1.78188	-2.03113	-2.53362	-1.86164	-2.58485	-1.97748
1377908_at	Cd4		1	1	1	1	1	1	-3.08698	1	1	1	1	1	1	1	-2.3553	1	1	1	1
1391045_at	Dgat2	diacylglycerol O-acyltransferase 2	-1.40104	-1.3885	1	1	1	1	-1.70429	1	-1.6674	-1.59867	1	-2.02468	1	-1.65768	-2.33527	-2.0611	-1.82388	-3.25685	-2.03369
1392937_at	Ccni	cyclin I	1	1	1	1	1	1	-1.54903	1	-1.67898	-1.51833	1	-1.45493	-1.48622	-2.14513	-1.66697	-1.87463	-1.74496	-1.83286	-1.91968
1378551_at	Cyp20a1	cytochrome P450, family 20, subfamily A, polypeptide 1	1	1	1	1	1	1	-1.72508	-1.68234	1	1	1	-2.01384	1	1	-1.5689	-1.60072	-1.55977	-2.15557	-2.0395
1383615_a_at	Hectd1	HECT domain containing 1	1	1	1	1	1	-1.24374	-1.49344	-1.29612	-1.27272	-1.70484	1	-1.76627	-1.2466	-1.51845	-1.5879	-1.87996	-1.78716	-1.89839	-1.99042
1390445_at	LOC688133	similar to mbt domain containing 1	1	1	1	1	1	1	1	1	1	1	1	-1.77	1	1	-1.84203	-2.32803	-2.07393	-2.24504	1
1376709_at	Slc39a8	solute carrier family 39 (metal ion transporter), member 8	1	-1.38639	1	-1.19295	1	1	-1.62033	-1.60071	-1.50299	-1.45463	-1.95095	-1.6901	-1.48418	-1.623	-1.97993	-2.15475	-1.83154	-1.74514	-2.04869
1375934_at	Rnf128	ring finger protein 128	1	-1.29248	1	1	-1.30472	-1.27476	-1.92895	-1.70547	-1.96017	-1.68357	-1.5149	-1.4336	-2.33478	-1.58228	-1.6778	-1.72821	-1.8242	-1.58498	-2.12228
1371738_at	Ano10	transmembrane protein 16K	1	1	1	1	1	1	-2.05914	1	1	1	1	-1.95857	1	1	-2.03441	1	1	-1.73385	-2.01097
1383281_at	RGD1306284	similar to RIKEN cDNA 1110005A03	1	1	1	1	1	1	-2.03145	1	1	-1.8269	-2.93355	-1.70257	1	-1.84494	1	-2.05	-1.89544	1	1
1388151_at	Coro7	coronin 7	1	1	1	1	1	1	1	1	-1.96982	1	1	-1.89476	1	1	-2.00593	-1.7213	-1.5717	-1.98771	1
1388402_at	Tmem134	transmembrane protein 134	1	1	1	1	1	1	1	1	1	1	1	1	1	-2.07635	-2.1458	-1.82417	-1.74096	1	1
1392952_at	Acsf2	acyl-CoA synthetase family member 2	-1.60469	1	1	1	1	1	-1.78891	-1.43796	-2.00433	-1.98265	1	-1.48167	-1.89213	-2.26212	-2.96551	-1.87477	1	-2.46682	1
1390901_at	Igsf10	immunoglobulin superfamily, member 10	1	1	1	1	1	1	1	1	1	1	1	1	1	1	-8.55471	1	1	1	1
1395803_at	1395803_at		1	1	1	1	1	1	-2.31414	1	1	1	1	1	1	1	1	1	1	1	1
1395003_at	Clec4a1	C-type lectin domain family 4, member a1	1	1	1	1	1	1	1	1	1	-2.53009	1	1	1	1	1	1	-2.09758	-2.68544	1
1376692_at	Hipk2	homeodomain interacting protein kinase 2	1	1	1	-2.15385	1	1	-2.68134	-2.03181	-2.14346	1	1	-2.54953	1	-3.23913	-2.43097	-2.44112	1	1	-3.20115
1390572_at	Thoc3	THO complex 3	1	1	1	1	1	1	-4.2595	1	1	1	1	1	-3.84106	1	-3.56822	1	-2.99515	1	1
1387531_at	Msra	methionine sulfoxide reductase A	1	-1.65454	1	1	1	-1.58497	-2.29247	-2.17362	-2.53488	-1.61113	1	-1.60472	-2.34865	1	-2.9134	-5.14	-4.17585	1	-3.85356
1375858_at	Tusc4	tumor suppressor candidate 4	1	1	1	1	1	1	1	1	1	-2.43374	1	1	1	1	-2.42224	-3.15765	1	-2.18614	1
1384936_at	Mawbp		1	1	1	1	1	1	1	1	1	1	1	-3.75944	1	1	1	-4.74223	1	1	1
1396168_at	Cat		1	1	1	1	1	1	1	1	1	-3.63006	1	1	1	1	1	1	1	1	1
1385160_at	LOC691926	similar to Stabilin-2 precursor (Hyaluronan receptor for endocytosis) /// stabilin 2	1	1	1	-2.25193	1	1	1	1	1	1	1	1	1	1	-2.80597	-3.68154	1	1	1
1383824_at	Ldb2	LIM domain binding 2	1	1	1	1	1	1	1	1	1	-2.24013	1	1	-2.29157	1	-2.69357	-2.48629	-2.12068	-2.18829	1
1371845_at	Pop4	processing of precursor 4, ribonuclease P/MRP family, (S. cerevisiae)	1	1	1	1	1	1	1	1	1	1	1	1	1	1	-2.38426	1	1	1	-3.44725
1397376_at	1397376_at		1	1	1	1	1	1	1	1	1	1	1	1	1	1	1	1	1	1	-4.7098
1375658_at	1375658_at		1	1	1	-2.17187	-1.51339	-1.58235	-1.87294	-1.55791	-1.52285	1	1	-1.87068	1	-2.00833	-3.03212	-3.32426	-2.13061	-2.26777	-2.43672
1383023_at	1383023_at		1	1	1	1	1	1	1	1	1	1	1	1	1	1	-2.72798	-2.72999	-2.34288	1	-2.47419
1389643_at	Wiz	widely-interspaced zinc finger motifs	1	1	1	1	1	1	1	1	1	1	1	1	1	1	-2.39931	1	-2.98918	1	1
1398743_at	1398743_at		1	1	1	1	1	1	1	1	1	1	1	1	-2.19309	1	1	1	1	1	1
1398486_at	LOC683007	similar to melanoma inhibitory activity 3	1	1	1	1	-3.37045	1	1	-2.83281	1	-2.33937	-3.36824	-2.46205	-6.58947	-2.04138	1	-1.85392	1	-2.03055	-2.37928
1391629_at	RGD1563042_predicted		1	1	1	1	1	1	1	1	1	1	1	1	1	1	-3.06513	1	1	1	1
1375531_at	Lrig3	leucine-rich repeats and immunoglobulin-like domains 3	1	1	1	1	1	-1.88697	1	-1.87578	1	-2.35369	1	1	-2.11154	1	-2.33664	-1.94986	1	-2.19994	-2.42255
1385970_at	Ctr9	Ctr9, Paf1/RNA polymerase II complex component, homolog (S. cerevisiae)	1	1	1	1	1	1	1	1	1	1	1	1	1	1	1	-2.29326	1	1	1
1377900_at	Abhd14b	abhydrolase domain containing 14b	-1.27848	1	1	1	1	1	-2.60923	-2.0885	-2.25012	-1.69175	-2.08951	-1.58645	-2.72558	-2.11169	-2.02346	-1.91961	-1.71781	-1.91264	-1.65448
1376066_at	Rnd3	Rho family GTPase 3	1	1	1	-1.24325	1	-1.58178	-2.0088	-1.7838	-1.76561	-1.65938	-1.70081	-1.90835	-2.01316	-2.40692	-1.8375	-2.0121	-1.51338	-1.56884	-2.01145
1388988_at	Abhd14b	abhydrolase domain containing 14b	-1.25803	-1.28326	-1.20475	-1.13071	-1.12958	-1.38263	-2.23168	-2.05326	-2.07267	-1.74967	-2.17806	-1.64415	-2.43219	-2.05006	-1.91738	-1.90287	-1.78264	-1.87294	-2.08549
1369492_at	Aadac	arylacetamide deacetylase (esterase)	1	1	-1.22489	-1.20005	1	-1.38304	-2.4895	-2.30248	-2.85468	-1.62577	-1.73372	-2.04365	-3.20175	-1.79693	-1.65078	-2.24578	-2.08742	-1.48504	-2.63246
1390789_at	Acad11	acyl-Coenzyme A dehydrogenase family, member 11	-1.62948	1	1	1	1	1	-2.43659	-1.9294	-1.64789	-2.1508	-1.62376	-2.06854	-3.37667	-1.6974	-3.0939	-2.00113	1	-2.23862	1
1368627_at	Rgn	regucalcin	1	-1.22196	-1.35988	-1.41198	-1.17408	1	-2.52242	-2.00942	-1.64773	-1.70667	-2.2315	-2.02931	-2.93726	-1.59801	-1.4809	-2.22234	-2.32273	-2.19914	-2.20496
1377745_at	Lrrc40	leucine rich repeat containing 40	1	1	1	1	1	1	1	1	1	1	1	1	-2.8822	1	1	-2.33262	-2.21557	-1.90719	-2.22068
1374558_at	RGD1562791_predicted		-1.40625	1	1	1	1	1	-2.03879	-1.59441	-2.04062	-1.70038	1	1	-2.82277	-2.74117	-2.73857	-1.71618	-1.82966	-2.18761	-1.6513
1385828_at	1385828_at		1	1	1	1	1	1	-1.86821	-1.5639	-1.43797	-1.70472	1	-1.90688	-2.48525	-2.23334	-2.28474	-1.86223	-1.88293	-2.07021	-1.74195
1391315_at	RGD1562174	similar to mKIAA1450 protein	1	1	1	-1.54976	1	1	1	-1.929	1	-1.80333	1	-1.64096	-2.48537	-1.92759	-1.88452	-2.11437	1	1	-2.20719
1368931_at	Sh3gl3	SH3-domain GRB2-like 3	1	1	1	1	1	1	-2.19814	1	-2.12329	-2.12294	1	1	-2.43731	1	-2.37932	-2.23053	-1.89631	-2.13474	-2.14788
1388127_at	Cyp4v3	cytochrome P450, family 4, subfamily v, polypeptide 3	1	1	1	-2.19705	1	1	-1.65617	-1.7552	1	-1.84659	-2.27004	-1.82422	-2.17923	-3.26272	-2.52508	-2.1643	-2.11993	-1.68911	-1.95446
1381588_at	Sft2d2	SFT2 domain containing 2	1	1	1	1	1	1	1	1	1	1	1	1	-3.1621	-2.76688	1	-2.38255	1	1	-2.0677
1391534_at	Elovl2	elongation of very long chain fatty acids (FEN1/Elo2, SUR4/Elo3, yeast)-like 2	-1.54779	1	2.04877	1	-1.57585	-1.54014	-2.40701	-2.19989	-2.2383	-1.83676	-1.58522	1	-3.73019	-2.02745	-4.47475	-1.85226	-1.58844	-2.48262	-2.47751
1379194_at	Klhdc5	kelch domain containing 5	1	1	1	1	1	1	1	1	1	1	1	1	-3.13268	1	-3.35494	1	-3.23924	1	1
1395630_at	Adcy9	adenylate cyclase 9	1	1	1	1	1	1	1	1	1	1	1	1	1	1	1	1	1	-5.17682	1
1379513_at	Tmem30b	transmembrane protein 30B	-1.5232	1	1.45855	-2.87053	-1.67664	-2.29136	-1.54359	1	1	-1.63269	1	-1.66427	-2.25574	-1.54948	-2.47966	-2.78397	-2.11156	-4.27633	-3.04842
1372102_at	Ncor1	nuclear receptor co-repressor 1	1	1	-2.40313	1	1	1	1	1	1	1	1	1	1	1	1	-2.88245	1	-2.85909	1
1386947_at	Cdh1	cadherin 1	1	1	1	-1.82333	1	1	1	1	1	1	-1.68774	-1.98633	-2.95331	-3.02264	-2.47335	-4.41417	-1.68505	-2.68757	-3.91787
1393310_at	Itch		1	1	1	1	1	1	-2.11201	1	1	1	1	1	1	1	-2.8376	-3.7153	-2.39394	-3.59279	-4.34406
1387506_at	Foxa3	forkhead box A3	1	1	1	1	1	1	1	-1.96024	-2.33988	1	1.60396	1	-2.77416	-1.83407	-3.92701	-5.10372	-2.95201	-8.18749	-3.19161
1368570_at	Lrat	lecithin-retinol acyltransferase (phosphatidylcholine-retinol-O-acyltransferase)	1	1	1	-1.92033	1	-2.00382	-2.15519	1	1	-3.79834	1	1	-1.82846	-2.00968	-4.56069	-2.78538	-2.71347	-2.01076	-4.3331
1376788_at	Dapk1	death associated protein kinase 1	1	1	1	1	1	-1.87049	1	1	-1.71873	1	1	1	-1.8538	-1.98659	-3.04803	-3.6321	-2.53468	-2.90762	-2.98456
1394889_at	Dapk2	death-associated kinase 2	1	1	1	1	1	1	1	1	1	1	1	1	1	1	1	1	-4.24898	1	1
1377603_at	Snx24	sorting nexing 24	1	1	-1.7835	1	1	-1.89097	1	1	1	-1.71126	1	-1.95904	-2.62326	-2.2924	1	-2.32533	-2.38379	-2.77445	-2.71878
1376688_a_at	LOC685020	similar to paired immunoglobin-like type 2 receptor alpha /// paired immunoglobin-like type 2 receptor alpha	-8.49201	1	-3.0961	-3.45346	1	-2.48758	-3.99887	1	-2.40888	1	1	1	-2.49077	1	-16.0564	-17.3267	-10.56	-2.12909	-1.84885
1392739_a_at	Eepd1	endonuclease/exonuclease/phosphatase family domain containing 1	1	1	1	1	1	1	1	1	1	1	1	1	1	-5.6009	-3.86187	1	-11.3034	-3.26032	1
1370024_at	Fabp7	fatty acid binding protein 7, brain	1	1	1.56016	1	-2.57401	1	1	1	1	-2.23956	1	1	-2.58857	1	-1.42973	1	-1.28942	-1.81909	1
1384950_at	Pi4k2b	phosphatidylinositol 4-kinase type 2 beta	1	1	1	1	1	1	1	1	1	-1.91166	1	1	-2.93969	1	1	1	1	1	1
1379592_at	Slc25a13	solute carrier family 25 (mitochondrial carrier, adenine nucleotide translocator), member 13	-1.16341	1	1	1	-1.25207	-1.28174	-1.68433	-1.43127	-1.52096	-1.92475	-1.41596	-1.47596	-2.72972	-1.56442	-1.48452	-1.37304	-1.16044	-1.20808	-1.28881
1390802_at	RGD1306839	similar to RIKEN cDNA 5033414D02	1	1	1	1	1	1	1	1	1	-1.90344	1	-2.38664	1	1	1	1	-2.05881	1	1
1392480_at	Pabpn1	Bcl2-like 2 /// poly(A) binding protein, nuclear 1	1	1	1	1	1	1	1	1	1	-1.60153	-5.24373	-1.82068	-2.09091	-1.44099	1	-1.6114	1	-1.528	1
1389681_at	Pvrl2		1	1	1	1	1	1	1	1	1	1	1	-1.7846	-1.88044	-1.67153	-1.80496	-1.59928	1	1	-1.95089
1398931_at	LOC690285	similar to CG12935-PA /// similar to CG12935-PA	1	1	1	1	1	1	-1.46946	-1.30165	1	-1.71575	-2.20714	-1.66172	-1.80646	-1.67941	-1.40493	-1.51333	-1.31364	-1.33749	-1.59086
1371974_at	Phyhd1	phytanoyl-CoA dioxygenase domain containing 1	1	1	-1.32433	1	1	-1.26559	-1.46337	1	1	-1.3742	-1.70036	-1.58037	-2.23516	-1.48712	-1.29613	-1.37928	-1.5039	-1.24597	-1.41081
1395331_at	RGD1306508	similar to hypothetical protein CL25084	1	1	1	1	1	1	1	1	1	-1.69053	1	1	1	1	-1.94232	-1.47259	1	1	1
1393732_at	1393732_at		1	1	1	1	1	1	1	1	1	1	1	1	-3.92723	1	1	1	1	1	1
1375436_at	Naprt1	nicotinate phosphoribosyltransferase domain containing 1	1	1	1	1	-1.66316	1	1	1	1	-1.93444	-2.06323	-1.73686	-3.46325	-1.7609	1	1	-1.80125	1	1
1373491_at	Gba	similar to Glucosylceramidase precursor (Beta-glucocerebrosidase) (Acid beta-glucosidase) (D-glucosyl-N-acylsphingosine glucohydrolase)	1	1	1	1	1	1	1	1	1	1	1	1	-1.87568	1	1	-1.4676	1	-1.47675	1
1379784_at	Pex7	peroxisome biogenesis factor 7	1	1	1	1	1	1	1	1	1	-1.79118	1	-1.84865	-1.82331	-1.56987	1	-1.49005	1	-1.67379	-1.48887
1390552_at	Magi1	membrane associated guanylate kinase, WW and PDZ domain containing 1	1	1	1	1	1	1	1	1	1	-2.1577	1	1	-2.21518	1	1	1	1	1	1
1376009_at	Ctage5	CTAGE family, member 5	1	-1.67404	-1.5883	1	1	-1.42455	-1.52693	-1.54241	-1.65662	-1.91086	1	-1.93201	-3.12629	-1.84509	-1.29371	-1.35577	1	-1.34822	-1.33057
1382964_at	1382964_at		1	1	1	1	1	1	1	1	1	1	1	1	-2.55533	1	1	1	1	1	1
1392311_at	RGD1564762_predicted		-1.93556	-1.65698	1	1	1	1	1	1	1	1	1	-1.93448	-1.63329	-1.92806	1	1	-1.85298	1	1
1380262_at	Sgk2		1	-2.01699	1	1	1	1	1	-2.11951	1	1	1	1	-3.08613	-3.52622	1	1	1	1	1
1393863_at	Cd180	CD180 molecule	1	1	1	1	1	1	1	1	1	1	1	1	-2.24281	1	1	1	1	1	1
1371176_at	Nfic	nuclear factor I/C	1	1	1	1	1	1	1	1	1	1	1	1	-5.91937	1	1	1	1	1	1
1392144_at	Nt5dc1	5'-nucleotidase domain containing 1	1	1	1	1	1	1	1	1	1	-2.0436	1	1	-2.09915	1	1	1	1	-1.48544	-1.67898
1372601_at	Atf5	activating transcription factor 5	-1.24514	-2.1847	-1.39488	-1.21981	1	-1.39148	1	1	1	-1.59425	1	-2.14622	-2.64359	-3.07502	-1.98149	-1.78175	-2.14421	-2.55624	-1.59283
1388678_at	Rnf138		1	1	1	1	1	1	1	1	1	-3.57625	1	-4.88763	1	1	1	1	1	1	1
1375562_at	1375562_at		1	1	1	1	1	1	1	1	1	-2.09525	1	-2.35165	1	1	1	1	1	1	1
1384855_at	RGD1562658	similar to RIKEN cDNA 1700009P17	1	1	1	1	1	1	1	1	1	1	1	1	1	-1.92023	1	1	1	1	1
1389390_at	Gatad1	GATA zinc finger domain containing 1	1	1	1	1	1	1	1	1	1	-2.88941	1	-2.70926	1	1	1	1	-1.97852	1	1
1368874_a_at	Mafg	v-maf musculoaponeurotic fibrosarcoma oncogene family, protein G (avian)	1	1	1	1	1	1	1	1	1	1	1	1	1	-2.68892	1	1	1	1	1
1395139_at	Kif16b	kinesin family member 16B	1	1	1	1	1	1	1	1	1	1	1	-2.57431	1	1	1	1	1	1	1
1377887_at	Acox3		-1.23564	1	1	1	-1.22072	-1.23672	-1.36991	1	-1.15687	-1.87038	-2.04124	-1.74191	-1.73854	-1.17745	-1.66257	-1.22365	1	-1.43599	-1.34423
1389622_at	Slc25a13	solute carrier family 25 (mitochondrial carrier, adenine nucleotide translocator), member 13	-1.21956	-1.20754	-1.16585	1	-1.18971	-1.21652	-1.5475	-1.27481	-1.34692	-2.04588	-1.56958	-1.51693	-2.34259	-1.49039	-1.29469	-1.26594	-1.23336	1	-1.37522
1369734_at	Acox3	acyl-Coenzyme A oxidase 3, pristanoyl	1	1	1	1	1	1	-1.38897	1	1	-2.10343	1	-1.55516	-2.15844	-1.36781	-1.64828	1	1	-1.34377	1
1368567_at	Ndufv3	similar to NADH-ubiquinone oxidoreductase 9 kDa subunit, mitochondrial precursor (Complex I-9KD) (CI-9KD) /// NADH dehydrogenase (ubiquinone) flavoprotein 3-like	1	1	1	1	1	1	1	1	1	1	1	1	1	1	1	1	1	1	-2.278
1382214_at	Nhlrc2	NHL repeat containing 2	1	1	1	1	1	1	1	1	1	1	1	1	-1.82074	1	1	1	1	1	1
1398608_at	Cenpl	centromere protein L	1	1	1	1	1	1	1	1	1	1	1	1	-2.20809	1	1	1	1	1	1
1374430_at	Glod4	glyoxalase domain containing 4	1	1	1	1	1	1	1	1	1	-1.68052	-2.31013	-1.73323	-1.5241	-1.65055	-1.42047	-1.36214	-1.37869	-1.3561	-1.54589
1379205_at	1379205_at		-1.49801	-1.397	1	-1.38508	1	-1.65732	1	1	1	-1.71705	1	-1.68899	-1.77035	-1.45383	-1.60973	1	-1.28354	1	-2.05883
1381872_at	RGD1308513		1	1	1	1	1	1	1	1	1	1	1	-2.01173	1	1	1	1	1	1	1
1377899_at	RGD1304982	similar to RIKEN cDNA 2810025M15	1	1	1	1	1	1	1	1	1	1	1	-2.0339	1	1	1	1	-3.20565	1	1
1391839_at	Spata9_predicted		1	1	1	1	1	1	1	1	1	1	1	-1.89758	1	-1.84739	1	1	1	1	1
1375979_at	RGD1309207_predicted		1	1	1	1	1	1	1	1	1	1	1	-1.69782	1	1	1	1	1	1	1
1384525_at	Dock11	dedicator of cytokinesis 11	1	-1.8093	1	1	1	-1.48239	-1.59035	1	1	-1.51152	1	-1.71437	-1.75616	1	1	-1.66018	1	1	-1.85205
1383885_at	Pbrm1	polybromo 1	1	1	1	1	1	1	1	1	1	1	1	-2.02957	1	1	1	1	1	1	1
1388716_at	Ehmt2	euchromatic histone lysine N-methyltransferase 2	1	1	1	1	1	-1.34463	1	1	1	-1.51081	1	-1.54988	-1.6986	-1.59229	-1.31833	1	1	1	-1.34617
1368056_at	Tsc2	tuberous sclerosis 2	1	1	1	1	1	1	1	1	1	1	1	1	1	-1.77118	1	1	1	1	1
1373123_at	Rmi1	RMI1, RecQ mediated genome instability 1, homolog (S. cerevisiae)	1	1	1	-1.44066	1	-1.4433	1	1	1	1	-1.98099	-2.16943	-1.69153	-1.85052	-1.32994	-1.60933	1	-1.32055	1
1376588_at	1376588_at		1	1	1	-1.97168	1	1	1	1	1	-1.96287	1	1	1	1	1	1	1	1	1
1395618_at	Cops4	COP9 (constitutive photomorphogenic) homolog, subunit 4 (Arabidopsis thaliana)	1	1	1	1	1	1	1	1	1	-1.58762	1	1	1	1	-1.38937	-1.546	1	-1.42331	1
1384339_s_at	Csnk2a1	casein kinase 2, alpha 1 polypeptide	1	1	1	1	1	1	1	1	1	-1.60209	1	-1.56077	-1.54191	-1.47522	1	1	1	1	1
1369275_s_at	Cyp2a1	cytochrome P450 IIA1 (hepatic steroid hydroxylase IIA1) gene /// cytochrome P450, subfamily 2A, polypeptide 1	-1.22383	-1.50634	-1.29895	-1.19967	-1.19489	-1.22989	-1.49924	-1.61061	-1.45696	-1.52589	-1.86739	-1.56792	-2.02307	-1.32454	-1.59457	-1.34831	-1.16227	-1.16829	-1.42993
1381548_at	Golim4	golgi integral membrane protein 4	1	1	1	1	1	1	1	1	1	1	1	1	-1.89109	-1.86224	1	1	1	1	1
1395655_at	Pi4k2b		1	-1.39879	1	1	1	1	1	-1.29894	1	-1.72021	-1.78033	-1.74144	-2.13038	-1.50676	1	-1.38024	1	-1.43957	-1.38298
1377389_at	1377389_at		1	1	1	-2.04503	1	1	1	1	1	1	1	1	1	1	1	1	1	1	1
1393619_at	Cnot6l	CCR4-NOT transcription complex, subunit 6-like	1	1	1	1	-1.39992	1	1	1	1	1	1	1	-1.87507	-1.44802	-1.47541	1	1	1	-1.44454
1392599_at	Syap1	synapse associated protein 1	1	-1.62849	-1.43254	1	-1.43878	1	-1.6051	-1.60557	-1.47302	1	-2.28725	-1.4447	-1.42942	-1.36296	1	1	1	-1.51511	-1.59618
1367520_at	Apoa1bp	apolipoprotein A-I binding protein	1	-1.51945	1	1	1	-1.34954	-1.43994	-1.41825	-1.38517	-1.33979	-2.08039	1	-1.4632	-1.505	1	1	1	1	1
1397004_at	Nr3c1		1	-1.54057	-1.50377	-1.29437	1	-1.56071	-1.5395	1	1	-1.29771	1	1	-1.5699	-1.44371	-1.42758	-1.36003	1	1	1
1371547_at	RGD1309695_predicted		-1.28073	-1.83752	-1.2476	1	1	1	-1.38231	1	-1.52834	-1.57579	-2.66569	-1.36303	-1.27891	-1.73087	-1.35181	-1.73595	-1.39307	-1.34755	1
1392527_at	RGD1560220	similar to translocase of the inner mitochondrial membrane 14 isoform a	-1.16572	-1.57953	1	1	-1.14448	1	-1.52641	-1.25181	-1.40197	-1.44072	-1.27075	-1.22084	-1.26885	-1.53704	-1.33521	-1.21449	-1.18427	-1.44504	-1.19341
1368166_at	Arl2	ADP-ribosylation factor-like 2	1	1	1	1	1	1	1	1	1	1	1	-2.39321	1	1	1	1	1	1	1
1382534_at	Centa2		1	1	1	1	1	1	1	1	1	-1.87498	1	-1.9162	-1.69822	-1.66634	1	1	1	1	1
1382236_at	RGD1305264_predicted		1	1	1	1	-1.3584	1	1	-1.38897	1	-1.95095	1	-2.12287	-1.73751	-1.37	1	1	1	1	1
1376079_at	Gimap7		1	1	1	1	1	1	1	1	1	-2.41598	1	-1.96835	-1.71475	1	1	1	1	1	1
1389672_at	Uhrf1bp1l	UHRF1 (ICBP90) binding protein 1-like	1	1	1	1	1	1	1	1	1	-2.02896	1	-2.00198	1	1	1	1	1	1	1
1388167_at	Nfib	nuclear factor I/B	1	1	1	1	1	1	-1.48117	-1.32112	-1.27435	-1.85099	-1.96615	-1.96556	-1.57142	-1.95182	1	1	1	1	1
1389024_at	Scfd2	similar to Sec1 family domain containing protein 2 (Syntaxin binding protein 1-like 1) (Neuronal Sec1)	1	1	1	1	1	1	1	1	1	1	1	1	-2.16318	1	1	1	1	1	1
1379965_at	RGD1562788_predicted		1	1	1	1	1	1	1	1	1	1	1	-2.53163	1	1	1	1	1	1	1
1377835_at	Dock8	dedicator of cytokinesis 8	1	1	-1.42248	1	1	1	1	1	1	-1.62512	-1.78668	-1.95502	-1.83117	-1.45578	-2.07678	1	1	1	1
1399113_at	RGD1565705_predicted		1	1	1	1	1	1	1	-2.08332	1	1	1	-2.75748	1	1	1	1	1	1	1
1383590_at	Csgalnact1		1	1	1	1	1	1	1	1	1	-1.59699	1	1	1	1	1	1	1	1	1
1374355_at	Fam113b	family with sequence similarity 113, member B	1	-1.82089	1	1	1	1	1	1	1	-1.6831	1	-1.79951	-1.62016	1	1	1	1	1	1
1389330_at	RGD1310127	similar to cDNA sequence BC017158	1	1	1	1	1	1	1	1	1	1	1	-1.94329	-2.10963	1	1	1	1	1	1
1390351_at	1390351_at		1	-1.71925	1	1	1	1	1	1	1	1	1	-2.26079	1	-1.78632	1	1	1	1	1
1383360_at	RGD735112	similar to RIKEN cDNA 5830404H04	1	1	1	1	1	1	1	1	1	-2.04832	1	1	1	1	1	1	1	1	1
1379765_at	Nlk	nemo like kinase	1	1	1	1	1	1	1	1	1	1	1	1	-2.09519	1	1	1	1	1	1
1373204_at	Tmem176a	transmembrane protein 176A	1	1	1	1	1	-1.74635	1	1	1	1	1	-1.26259	-2.05764	1	-1.57295	-1.35062	-1.32203	1	1
1379912_at	Cnot6l_predicted		1	1	1	1	1	-1.94926	1	1	1	1	1	1	1	-2.24935	1	1	1	1	1
1373534_at	Sfrs18	splicing factor, arginine/serine-rich 18	1	-1.36869	-1.42392	-1.7477	-1.37882	-2.67086	-1.4331	1	1	-1.48121	1	-2.0015	1	-1.45537	1	1	1	1	1
1387994_at	Hsd17b6	hydroxysteroid (17-beta) dehydrogenase 6	-1.26438	-2.01073	-1.41618	1.17182	1.21018	-1.85549	-1.31385	1	-2.24587	-1.53947	1	-1.5216	-1.51509	-1.33654	1	1	1	1	1
1389642_at	LOC499768		1	1	1	1	1	1	1	1	1	-1.9749	1	-1.83702	1	1	-1.72612	-1.79234	1	1	1
1390845_at	1390845_at		1	-1.85058	1	1	1	1	1	1	1	1	1	1	1	-1.89408	-1.81871	1	-1.81095	1	1
1386895_at	Maged1	melanoma antigen, family D, 1	1	-1.35024	1	1	-1.30261	1	1	1	1	-2.53432	-1.74225	-2.5944	-1.86404	-1.81173	-2.06272	-1.83661	-1.2908	-1.73549	-1.62608
1367482_at	Anapc11	anaphase promoting complex subunit 11 homolog (yeast)	1	1	1	1	1	1	1	1	1	1	1	1	1	1	-2.47879	-2.09486	1	1	1
1371464_at	Zfand6	zinc finger, AN1-type domain 6	1	-1.18767	-1.16083	1	1	1	-1.30141	-1.22766	1	-1.61157	-2.45595	-1.95308	-1.62722	-1.56729	-1.60102	-1.54363	-1.63554	-1.61051	-1.63764
1371835_at	Prkacb	protein kinase, cAMP dependent, catalytic, beta	1	1	1	1	1	1	1	-1.59957	1	1	1	-2.51341	1	1	-1.58833	-1.68569	-1.64942	-1.38759	-1.66307
1393309_at	LOC503192	zinc finger protein ZFP	1	1	1	1	1	1	-1.75818	1	-1.58748	1	1	-1.87508	-1.58256	-1.50387	-1.6896	-1.58896	-1.92596	1	1
1376038_at	Tex2	testis expressed gene 2	1	1	-1.30563	1	1	1	-1.30768	1	-1.35421	-1.78453	-2.19392	-1.69571	-1.53541	-1.35296	-1.86343	-1.75873	-1.68469	-1.42596	-1.92357
1373166_at	RGD1563309	similar to diacylglycerol kinase, delta 130kDa isoform 1	1	1	1	1	1	1	1	1	1	1	1	1	1	1	1	1	1	-2.07828	1
1393005_at	Sft2d2	SFT2 domain containing 2	1	1	1	1	1	1	1	1	1	1	1	1	1	1	1	-1.65754	-1.58345	-2.16935	-1.64604
1375662_at	RGD1563087_predicted		1	-1.49071	1	1	-1.51717	-1.29627	-1.43078	-1.42031	-1.37147	-1.59637	-1.49133	-1.98161	-1.27875	-1.5314	-1.65215	-1.56863	-1.61427	-1.57961	-2.08134
1397949_at	Mpp6_predicted		1	1	1	1	1	1	1	1	1	1	1	-1.73477	-1.65061	-1.66624	1	1	1	1	-2.22743
1371523_at	Commd1	copper metabolism (Murr1) domain containing 1	1	1	1	1	1	1	1	-1.83603	1	-2.106	1	-1.68117	-2.18969	-2.48027	1	1	-1.53986	-1.66573	-1.64255
1376963_at	Dyrk2	dual-specificity tyrosine-(Y)-phosphorylation regulated kinase 2	1	1	1	1	1	1	1	1	1	1	1	-1.80813	1	1	1	1	-1.99025	1	-1.86921
1378178_at	Smc6l1	SMC6 structural maintenance of chromosomes 6-like 1 (yeast)	1	1	1	1	1	1	1	1	1	-1.7832	-3.49032	-2.11918	1	-1.57146	-1.62884	-1.65047	1	-1.64088	-1.57745
1398906_at	LOC287274	sedlin-like	1	1	1	1	1	1	1	1	1	1	1	-1.81121	-2.48511	-1.46716	-1.58507	-1.59675	-1.59275	-1.55607	-1.64881
1392811_at	Usp40	ubiquitin specific peptidase 40	1	1	1	1	1	1	1	1	1	1	1	1	1	1	1	1	1	-2.89097	1
1386064_at	Dyrk2_predicted		1	1	1	1	1	1	1	-2.30544	-1.86262	-1.85116	1	1	1	1	1	1	1	1	1
1392989_at	Mib1_predicted		1	-1.34829	1	1	1	-1.21758	-1.27749	-1.52584	-1.29446	-1.31084	-1.966	-1.76716	-1.58139	-1.36273	-1.5492	-1.74032	-1.7873	1	-1.98354
1389338_at	Tmem126b	transmembrane protein 126B	1	1	1	1	1	1	-1.40447	-1.58862	-1.56882	-1.54832	-2.17009	1	-1.58417	-1.64437	-1.522	1	1	-1.97794	-1.65042
1367807_at	Plod1	procollagen-lysine, 2-oxoglutarate 5-dioxygenase 1	1	-1.51674	1	1	1	1	1	1	1	-1.54773	-1.89547	-1.44188	-1.63155	-1.33843	-1.77058	-1.71044	-1.39073	-1.7694	1
1390459_at	1390459_at		1	1	1	1	1	1	1	-1.82234	1	1	1	1	1	1	1	1	1	1	1
1373049_at	RGD1562136	similar to D1Ertd622e protein	1	1	1	-1.48656	-1.49918	1	1	1	-1.36773	-1.52595	1	-1.39013	-1.39126	1	1	-2.18986	-1.40091	-1.61875	-1.64846
1374749_at	Arpc5l		1	1	1	1	1	1	-1.46672	1	-1.38565	-1.66882	1	-1.62606	-1.81955	-1.35776	-1.75782	-1.68984	-1.67381	-1.36282	-1.902
1386766_at	1386766_at		1	1	1	1	1	1	1	1	1	1	1	-1.89576	-2.20506	1	-1.56381	-1.80819	-1.56666	1	1
1371996_at	Aebp2_predicted		1	1	1	1	1	1	1	1	1	1	1	-1.94338	1	1	-1.76923	-1.56782	-1.81931	-1.31049	-1.72893
1370540_at	Nr1d2	nuclear receptor subfamily 1, group D, member 2	1	1	1	1	1	1	1	1	1	1	1	1	1	1	-2.98094	1	1	1	1
1373281_at	Lmf1	lipase maturation factor 1	1	1	1	1	1	1	1	1	1	1	1	1	-1.71625	1	1	1	1	1	1
1385460_at	Wsb2	WD repeat and SOCS box-containing 2	1	1	1	1	1	1	1	1	1	1	-4.43728	1	1	1	-2.536	1	1	1	1
1379472_at	Nadsyn1	NAD synthetase 1	1	1	1	1	1	1	1	1	1	-2.86819	1	1	1	1	-2.14378	1	1	1	1
1397884_at	RGD1562860	similar to RIKEN cDNA 2310045A20	1	1	1	1	1	1	1	1	1	1	-3.42618	1	1	1	1	1	1	1	1
1382149_at	1382149_at		1	1	1	1	1	1	1	1	1	1	1	1	-1.90928	-1.64113	1	1	-1.90605	-2.61174	1
1371173_a_at	Cast	calpastatin	1	1	1	-1.72476	1	1	1	-1.65798	1	1	1	-1.79011	1	1	1	1	1	1	1
1370821_at	Tpmt	thiopurine methyltransferase	-1.29705	-1.313	-1.29017	1	1	1	-1.87365	-1.5263	-1.86048	-1.44869	-2.1467	-1.49664	-2.221	-1.83883	-1.57849	-1.46618	-1.44562	-1.92333	-1.48575
1385791_at	Vill	villin-like	1	1	1	1	1	1	1	1	1	1	1	1	-1.94647	1	1	1	1	1	1
1374871_at	Asrgl1	asparaginase like 1	1	1	-2.43594	1	1	-2.72801	1	1	1	1	1	1	1	-2.57626	1	-2.12528	1	-2.25743	-3.83046
1386988_at	Deaf1	deformed epidermal autoregulatory factor 1 (Drosophila)	1	1	1	1	1	1	1	1	1	1	1	1	1	1	1	1	1	-2.24721	1
1373776_at	1373776_at		1	1	1	-1.88724	1	1	1	1	1	1	1	1	-1.96392	1	-1.87387	-2.05104	1	1	-2.6563
1369145_a_at	Kcnd3	potassium voltage gated channel, Shal-related family, member 3 /// similar to Potassium voltage-gated channel subfamily D member 3 (Voltage-gated potassium channel subunit Kv4.3)	1	1	1	1	1	1	1	1	1	1	1	1	1	1	1	1	1	1	-6.02003
1387566_at	Pla2g4a	phospholipase A2, group IVA (cytosolic, calcium-dependent)	1	1	1	-1.8901	1	-1.64172	-1.73865	1	1	1	1	1	-1.60867	1	-1.59267	-1.55543	1	1	1
1383012_at	Rhpn2	rhophilin, Rho GTPase binding protein 2	1	1	1	-3.74847	1	-2.37064	1	1	1	1	1	1	-2.31822	1	1	-1.83732	1	1	1
1387038_at	Ccs	copper chaperone for superoxide dismutase	1	1	1	1	1	1	-1.56493	-1.57912	1	-1.63423	1	-1.49998	-2.22769	-1.88085	-1.55693	-1.35019	-1.44964	-1.58909	-1.7129
1395589_at	Slc35a3	solute carrier family 35 (UDP-N-acetylglucosamine (UDP-GlcNAc) transporter), member 3	1	1	1	1	1	1	1	1	1	1	1	1	-2.2869	1	1	1	1	1	1
1393168_at	LOC688133	similar to mbt domain containing 1	1	1	1	-1.87655	1	1	1	1	1	1	1	-1.89134	1	1	1	1	1	-2.68452	1
1379615_at	Klhdc5	kelch domain containing 5	1	1	1	1	1	1	1	1	1	1	1	1	-1.72398	-1.71264	1	1	1	1	-2.50515
1387184_at	Axin2	axin2	1	1	1	1	1	1	1	1	1	1	1	1	1	-1.97267	1	-2.11817	1	-1.92213	1
1387323_at	Klkb1	kallikrein B, plasma 1	1	1	1	-1.19605	-1.57108	-1.46667	-1.85072	-1.55175	-1.43139	-1.38318	-1.44819	-1.2438	-2.35763	-1.46969	-1.45174	-1.44278	-1.37905	1	-2.04036
1386917_at	Pc	pyruvate carboxylase	1	1	1	1	-1.67339	1	-1.93293	-1.70156	-1.58217	-1.5883	-1.50859	1	-3.55226	1	-1.52272	-1.48202	-1.32726	-1.53992	-1.42998
1398267_at	Slc22a7	solute carrier family 22 (organic anion transporter), member 7	1	1	1	1	1	1	1	1	1	-2.17702	1	1	-3.02165	-1.57748	-1.77766	-1.54025	-1.59222	-1.81465	-1.35677
1382658_at	LOC502710	similar to Myeloid/lymphoid or mixed-lineage leukemia protein 3 homolog (Histone-lysine N-methyltransferase, H3 lysine-4 specific MLL3)	1	1	1	1	1	1	1	1	1	1	1	1	-2.0273	1	1	1	1	1	1
1382008_at	RGD1309804	similar to hypothetical protein FLJ11218	1	1	1	1	-1.39263	1	-1.45475	-1.41277	1	-1.63966	-2.06796	1	-2.36396	-1.62746	-1.34434	-1.42894	-1.37709	-1.3037	-1.27868
1381196_at	Tm6sf2	transmembrane 6 superfamily member 2	1	1	1	1	1	1	1	1	1	1	1	1	-2.34337	1	1	1	1	1	1
1393862_at	LOC681227	similar to Camello-like 2 /// similar to RIKEN cDNA 1700019G17	1	1	1	1	1	1	1	1	1	1	1	1	-1.57271	1	1	1	1	1	1
1382476_x_at	Peli3_predicted		1	1	1	1	1	1	1	1	1	1	1	1	1	1	1	1	1	-2.12172	1
1379329_at	LOC685729	Similar to dimerization cofactor of hepatocyte nuclear factor 1 (HNF1) from muscle	1	1	1	1	1	1	1	1	1	1	1	1	1	-1.66297	1	1	1	1	1
1387847_at	Pik3cb	phosphatidylinositol 3-kinase, catalytic, beta polypeptide	1	1	1	1	1	1	1	1	1	1	1	1	1	1	-2.19263	1	1	1	1
1382221_at	1382221_at		1	1	1	1	-1.36969	1	-1.63534	-1.75658	-1.58532	-1.35143	1	1	-1.96573	-1.52898	-1.27025	-1.42649	-1.27646	1	-1.55773
1384293_at	Ncor1	nuclear receptor co-repressor 1	1	-1.33428	1	-1.33428	1	-1.39694	-1.49381	-1.30081	-1.41108	-1.46177	1	-1.39112	-1.35986	-1.60544	-1.44112	-2.01748	-1.43463	-1.6476	-1.60222
1367939_at	Rbp1	retinol binding protein 1, cellular	-1.28438	1	1	-1.82499	-1.2454	-2.38397	-1.74418	1	-1.35461	1	1	1.28574	-1.47984	1	-1.9374	-1.55984	-1.27849	-1.39223	-1.23601
1394472_at	Rgl1	Ral guanine nucleotide dissociation stimulator,-like 1	1	1	1	1	1	1	1	1	-1.69089	1	1	1	1	1	1	1	1	1	1
1386052_at	Il7r	Interleukin 7 receptor	1	1	1	1	1	1	-2.36909	-2.63488	-2.3497	1	1	1	1	1	1	1	1	1	1
1378239_at	Gaa	glucosidase, alpha, acid	1	1	1	1	1	1	-1.82317	-1.89653	-1.99694	1	1	1	1	-2.87867	-2.14949	-1.72513	1	1	1
1372746_at	RGD1566239	similar to RIKEN cDNA 2810428I15	1	1	1	1	1	1	-2.03822	1	1	-1.85142	1	1	-1.77629	1	1	-1.97457	1	1	1
1393171_at	RGD1564799	similar to transmembrane 4 superfamily member 10	1	1	1	1	-1.41728	1	-2.29018	-1.72866	-1.64459	-1.67411	1	-1.50802	-2.10578	-1.80976	-1.5243	-1.40124	-1.3369	-1.41329	-1.48243
1383554_at	Rnf128	ring finger protein 128	1	-1.24776	1	1	-1.28288	-1.20383	-1.95041	-1.58542	-1.71624	-1.53344	1	-1.33743	-2.51242	-1.82229	-1.63187	-1.65826	-1.6032	-1.69335	-2.16774
1380885_at	Tex2		1	1	1	1	1	1	-2.72665	1	-2.85185	1	1	1	1	1	1	1	1	1	1
1384705_at	Phf17	PHD finger protein 17	1	1	1	1	1	1	1	1	1	-6.54426	1	1	1	-6.74478	1	1	1	1	1
1380882_at	Pik3r1		1	1	1	1	1	1	1	1	1	1	1	1	1	-8.61584	1	1	1	1	1
1375399_a_at	Mark4	MAP/microtubule affinity-regulating kinase 4	1	1	1	1	1	-4.20048	1	1	1	1	1	1	1	1	1	1	1	1	1
1383300_at	Klhl24	kelch-like 24 (Drosophila)	1	1	1	-1.6483	1	-1.77698	1	1	1	1	1	-1.85717	1	-1.92764	1	-1.71059	1	1	-1.52342
1383110_at	Klhl24	kelch-like 24 (Drosophila)	1	1	1	-1.53507	1	-1.5473	1	-1.30935	1	1	1	-1.34358	-1.29723	-1.81032	1	-1.43704	1	1	-2.02019
1391770_at	Usp33	Ubiquitin specific peptidase 33	1	1	1	1	1	-1.48947	-1.47826	-1.736	1	1	1	1	-1.8843	-1.69214	1	1	1	1	1
1384324_at	Rbm14	RNA binding motif protein 14	1	1	1	1	1	1	1	1	1	1	1	1	-3.68423	1	1	1	1	1	1
1394330_at	LOC361915		1	1	1	1	1	-1.58594	1	-1.47877	-1.40152	-1.60227	1	-1.71913	-1.96495	-1.95333	1	1	1	1	1
1398299_at	Arhgef11	Rho guanine nucleotide exchange factor (GEF) 11	1	1	1	1	1	1	1	1	1	1	1	1	1	-2.39748	1	1	1	1	1
1371754_at	Slc25a25	solute carrier family 25 (mitochondrial carrier, phosphate carrier), member 25	-2.03274	-3.09951	-3.60772	-1.88551	1.33667	-1.7635	-3.05108	-1.88625	-3.20156	-2.80859	1.38825	1.34799	-2.75372	-2.09094	-1.29774	-2.13565	-1.86976	-1.38879	-1.25709
1379826_at	Ccdc107	coiled-coil domain containing 107	1	1	1	1	1	1	1	-2.1471	1	-1.96895	1	1	1	1	1	1	-1.56436	-1.48327	-1.81556
1389580_at	Hltf	helicase-like transcription factor	1	1	1	1	1	1	1	1	1	1	1	-3.91887	1	1	1	1	1	1	1
1368593_at	Cd1d1	CD1d1 molecule	1	1	1	1	1	1	1	1	-2.86562	1	-3.11033	-2.34899	-2.85709	-1.99418	1	1	1	1	1
1381489_at	Sox6		1	1	1	1	1	1	1	1	1	1	1	-2.26899	1	-2.61798	1	1	1	-2.08466	1
1376180_at	LOC499195		1	1	1	1	1	1	1	1	1	1	1	-5.07399	1	1	1	1	1	1	1
1374027_at	Znf187		1	1	1	1	1	-2.235	-1.56527	1	-1.44923	-1.49842	1	-2.29767	-1.81141	-1.82006	-1.27809	-1.55614	-1.69782	-1.655	-1.76594
1381471_at	1381471_at		1	1	1	1	1	1	1	1	1	-2.78218	1	1	1	1	1	1	-3.50808	1	1
1380685_at	1380685_at		1	1	1	1	1	1	-2.72979	1	1	1	1	1	1	1	1	1	1	1	1
1390189_at	LOC298977	similar to zinc finger protein 277 isoform 1	1	1	1	1	1	1	1	1	1	1	1	-1.75889	1	1	1	1	1	1	-2.63643
1369218_at	Met	met proto-oncogene	1	1	1	-1.52016	1	-1.43936	-1.70458	-1.80115	-1.68328	-1.87742	-1.76161	-1.8509	-2.07707	-1.8203	-1.86956	1	1	1	1
1379029_at	RGD1560191	similar to Zinc finger protein 62 homolog (Zfp-62) (ZT3)	1	1	1	1	1	-2.20392	1	-1.83815	1	1	1	-1.9036	1	1	1	1	1	1	-2.01452
1368164_at	Blvra	biliverdin reductase A	1	1	1	1	1	1	1	1	1	1	1	1	-3.04207	1	1	1	1	1	1
1383840_at	Csgalnact1	chondroitin sulfate N-acetylgalactosaminyltransferase 1	1	1	1	1	1	1	1	1	1	-1.88255	1	1	1	1	1	1	1	1	1
1368155_at	Cyp2c12	cytochrome P450, family 2, subfamily c, polypeptide 12	-1.54857	1.91261	-2.06009	-1.79794	-1.90606	-2.39811	-2.31038	2.13125	1	-2.46818	1	1	-3.5709	-1.89452	-2.28969	-2.74204	-1.27744	1.4519	-1.80713
1371404_at	Eif4b	eukaryotic translation initiation factor 4B	1	1	1	1	1	1	1	1	1	1	1	1	1	1	-1.65192	-1.75809	-1.47029	-1.44571	-1.89461
1367974_at	Anxa3	annexin A3	1	1	1	-1.57205	1	1	-2.00209	-1.96846	-1.88441	-1.46289	-2.32847	-1.76054	-1.43914	-1.89462	-1.67864	-1.87859	-1.75387	1	-1.64532
1385739_at	1385739_at		1	1	1	-1.58035	1	1	-2.2418	-1.94335	-1.55927	-1.71419	-1.83995	-1.827	1	-2.00139	-1.75853	-1.7845	-1.58731	1	-1.75284
1370585_a_at	Prkcb	protein kinase C, beta 1	1	-1.58448	1	-1.84103	1	-1.75332	-1.64921	1	1	-1.70473	1	-1.60268	-1.83677	-1.63338	1	1	1	1	1
1387679_at	Slco1b2	solute carrier organic anion transporter family, member 1b2	1	-1.4181	1	1	1	1	-2.29801	-1.40755	1	-2.05661	1	-1.54241	-2.30532	-1.76267	-2.06224	-1.69942	-1.3742	-1.37765	-1.73551
1378802_at	RGD1303232	Phytn_dehydro and Pyr_redox domain containing protein RGD1303232	1	1	1	-1.6572	1	-1.65239	1	1	1	-1.81912	1	-1.74385	-2.14136	-2.09058	-1.7506	-2.16219	1	1	-1.85759
1372438_at	Nit2	nitrilase family, member 2	-1.14813	1	-1.41086	-1.36251	-1.13106	-1.27968	-1.62299	-1.62915	-1.47343	-1.42052	-2.33301	-1.6794	-2.24299	-1.6711	-1.35619	-1.40739	-1.80575	-1.35575	-2.05436
1370936_at	Dmgdh	dimethylglycine dehydrogenase precursor	1	-1.36891	1	-1.27969	1	-1.38592	-2.18968	-1.44548	-1.88717	-1.67856	-1.28798	-1.36659	-2.07766	-1.80813	-1.35826	-1.98024	-1.56231	-1.35727	-1.89703
1375346_at	RGD1563941	similar to hypothetical protein FLJ20010	1	1	1	1	1	1	-2.02562	1	-1.8727	-1.76005	-2.57455	-1.73047	-2.29287	-1.74663	-1.5913	-2.25599	1	1	-1.80485
1368387_at	Bdh1	3-hydroxybutyrate dehydrogenase, type 1	1	1	1	1	-1.62612	-1.41424	-1.70534	-1.71271	-1.87719	-1.93654	-1.79936	-1.48369	-2.81629	-2.04722	-1.59045	-1.29803	-1.48194	-1.39164	-1.71291
1369446_at	Cry2	cryptochrome 2 (photolyase-like)	1	1	1	1	1	1	1	1	1	1	1	1	1	1	1	1	1	-4.18572	1
1379107_at	Slc4a4		1	1	1	1	1	1	1	1	1	1	1	1	1	1	1	1	1	1	-3.18433
1396215_at	LOC502782		1	1	1	1	1	1	1	1	1	1	1	1	-2.84746	1	1	1	1	-2.25292	1
1373709_at	Fam149b1	family with sequence similarity 149, member B1	1	1	1	1	1	1	1	-2.19016	1	1	1	1	-2.40065	1	1	1	1	1	1
1381793_at	1381793_at		1	1	1	1	1	1	-2.87951	-1.86565	-1.89664	-1.89735	1	-2.32272	-2.72134	-2.56592	1	1	1	1	1
1373686_at	Serpina6	serine (or cysteine) peptidase inhibitor, clade A, member 6	-1.28538	-1.54215	1	-1.39124	1	-1.40903	-1.8534	-1.78747	-2.49518	-1.80336	-3.01031	-1.2029	-2.50111	-2.32848	-1.72618	-1.40607	-1.6536	1	-1.46764
1375269_at	Dera	similar to Putative deoxyribose-phosphate aldolase (Phosphodeoxyriboaldolase) (Deoxyriboaldolase) (DERA)	1	1	1	1	1	1	-1.92137	-2.56855	-1.77395	1	1	-2.11856	-3.54159	-2.03523	-1.56988	-1.70597	-1.81964	-1.55402	-2.07241
1380062_at	Mpp6	membrane protein, palmitoylated 6 (MAGUK p55 subfamily member 6)	1	1	1	1	-1.30053	1	-1.81819	-2.13271	-1.85691	-1.751	1	-1.54607	-2.56499	-2.43192	-1.46023	-1.58348	-1.54388	-1.7203	-1.63938
1377663_at	Rnd3	Rho family GTPase 3	1	1	1	1	1	1	-2.0996	-2.12933	-1.65155	-1.56506	1	1	-2.44129	-2.90533	-1.71102	-1.59592	-1.44575	-1.8853	-1.87687
1368078_at	Esm1	endothelial cell-specific molecule 1	1	-2.4174	1	-8.83468	-3.6902	-4.71092	-3.07418	1	-4.08295	1	2.61182	1	1	1	1	1	1	1	-4.1634
1390038_at	Adcy5	Adenylate cyclase 5	1	1	1	1	1	1	1	1	1	1	1	1	1	1	1	1	1	1	-4.34303
1368060_at	Hrsp12	heat-responsive protein 12	1	-1.31783	-1.14831	1	-1.13144	-1.1758	-1.9666	-1.8174	-1.71129	-1.39128	1.19097	-1.43407	-1.8629	-1.45653	-1.29815	-1.58363	-1.73445	-1.17012	-2.1961
1385376_at	1385376_at		1	1	1	1	1	1	1	1	1	1	1	1	1	1	1	1	1	1	-5.72645
1398155_at	CPG2		1	1	1	1	1	1	1	1	1	1	1	1	1	-4.17825	1	1	1	1	-6.23005
1368134_a_at	Il4ra	interleukin 4 receptor, alpha	1	1	1	1	-3.07887	1	1	1	1	1	1	1	1	1	1	1	1	1	1
1391297_at	Rcor1	REST corepressor 1	1	1	1	-2.5091	1	1	1	1	1	1	1	1	1	1	1	1	1	1	1
1374002_at	LOC100192313		1	1	1	1	1	1	1	1	1	1	1	1	-2.80616	1	1	1	1	1	1
1369643_a_at	Lphn2	latrophilin 2	1	1	1	1	1	1	1	1	1	1	1	1	-3.41067	-4.34769	1	1	1	1	1
1368446_at	Spink3	serine protease inhibitor, Kazal type 1	1	1	1	1	1	1	1	1	1	1	1	1	-2.32615	1	1	1	1	1	1
1384968_at	Sh3bp2	SH3-domain binding protein 2	1	1	1	1	1	1	1	1	1	1	1	1	-2.23715	1	1	1	1	1	1
1383981_at	Tp53bp2		1	1	1	1	1	1	1	1	1	1	1	-1.81139	1	-2.2698	1	1	1	1.52472	-1.7641
1394699_at	RGD1564677	similar to transcription factor ONECUT2	1	1	-1.25673	-1.39075	1	-1.56781	-1.2752	-1.27399	1	-1.51166	1	-1.69941	-2.29168	-2.30894	1.57468	1.66358	1.6932	1.67192	1.93114
1368712_at	Zfp386	zinc finger protein 386 (Kruppel-like)	1	1	1	-1.44376	-1.61851	-2.97782	1	1	1	-1.77257	-1.86244	-2.15291	-1.66176	-1.41613	1	1	1	1	-1.46786
1388900_at	RGD1566118	RGD1566118	1	1	1	-2.01013	-1.99347	-1.89384	-1.75193	-1.83383	-1.77859	-1.60284	1	-1.69337	-1.39226	-1.49045	1	1	1	1	1
1394756_at	RGD1308297		1	1	1	1	-2.57702	1	-2.32217	-2.13306	-2.0172	1	1	1	-3.07806	-2.40883	1	1	1	1	1
1376354_a_at	RGD1311732		1	1	1	-4.41642	1	1	1	1	1	1	1	1	1	1	1	1	1	1	1
1393795_at	Zeb2	zinc finger E-box binding homeobox 2	-2.29578	1	-3.77018	1	1	-2.5303	-1.8477	-2.04822	-1.8535	1	1	1	1	-1.83886	1	1	1	1	1
1391572_at	Cars	cysteinyl-tRNA synthetase	1	-2.03902	1	1	1	1	1	1	1	1	1	1	1	1	1	1	1	1	1
1372953_at	Ncald	neurocalcin delta	-4.40061	1	1	-3.50505	1	1	1	-1.98521	1	1	-3.27242	1	-1.96433	1	1	1	1	1	1.49623
1380600_at	LOC685269	similar to Integrin alpha-IIb precursor (Platelet membrane glycoprotein IIb) (GPalpha IIb) (GPIIb) (CD41 antigen)	1	1	1	1	1	1	1	1	1	1	1	1	-2.3047	1	1	1	1	1	1
1391460_at	1391460_at		1	1	1	-1.91245	1	-1.63214	-1.56713	-1.64311	1	1	1	1	-2.01671	-1.55444	1	1	1	1	1
1376938_at	Ppp2r2a		1	1	1	1	1	1	1	-1.62951	1	1	1	1	1	-1.74361	1	1	1	1	1
1371038_at	Cebpg	CCAAT/enhancer binding protein (C/EBP), gamma	1	1	1	1	-1.73429	1	1	1	1	1	1	1	1	1	1	1	1	1	1
1383574_at	Man1a1	mannosidase 1, alpha	1	-1.28982	1	-1.39888	-1.33519	-1.31363	1	-1.28514	1	1	1	1	-1.66407	1	1	1	1	1.1912	1
1369171_at	Mst1	Macrophage stimulating 1 (hepatocyte growth factor-like)	1	1	-1.72678	-1.61126	-1.55527	1	-1.98829	-1.18494	-1.96072	1	-2.10016	1	-1.85151	-1.37548	1	1	1	-1.71731	1
1390825_at	Slc35b3	solute carrier family 35, member B3	1	1	1	1	1	1	1	1	1	1	1	1	-1.81977	1	1	1	1	1	1
1368992_a_at	Sfrs5	splicing factor, arginine/serine-rich 5	-1.23453	-1.20653	-1.45793	-1.3649	-1.41767	-1.68016	-1.7289	1	-1.23764	-1.38958	-1.31732	-1.83134	-1.21676	-1.28276	1	1	1	1	-1.29315
1393933_at	Sorl1	sortilin-related receptor, LDLR class A repeats-containing	-2.10454	1	1	1	1	1	1	1	-2.28148	1	1	1	1	1	1	1	1	1	1
1389645_at	Prodh2	proline dehydrogenase (oxidase) 2	1	-1.41189	1	-1.34724	-1.37532	-1.4451	-2.01191	-1.41976	-2.02106	-1.28056	-1.74714	-1.5439	-2.22757	1	-1.33049	-1.51118	1	-1.31285	-1.42825
1379587_at	Rdh5	retinol dehydrogenase 5	1	1	1	1	-2.09246	1	1	1	1	1	1	1	-1.90356	1	1	-1.77647	1	1	1
1387832_at	Bche	butyrylcholinesterase	1	1	1	1	1	1	1	1	1	1	1	1	-2.50555	1	1	1	1	1	1
1376579_at	Lap3	leucine aminopeptidase 3	-1.22896	-1.28546	-1.47048	-1.5614	-1.20815	-1.28103	-1.31225	1	1	-1.65539	-1.4033	-1.58041	-1.78755	-1.50537	1	1	1	-1.3211	-1.44587
1384256_at	Larp7	similar to multi sex combs CG12058-PA	1	1	1	1	1	1	1	1	1	1	1	-1.99199	1	1	1	1	1	1	1
1391661_at	Gk	glycerol kinase	-1.32742	-1.61399	-1.25642	-1.27473	-1.31944	-1.21336	-1.43767	-1.38175	-1.29981	-1.71937	-1.87634	-1.31652	-1.99032	-1.42021	1	1	1	1	1
1367849_at	Sdc1	syndecan 1	-1.58705	-1.71756	-1.5963	-1.38015	-1.63139	-1.53863	1	1	-1.80568	-1.54226	1	-1.34265	-1.68404	-2.11145	-1.23855	1	1	1	-1.24872
1395261_at	Snrp70	U1 small nuclear ribonucleoprotein polypeptide A	1	-1.763	1	-1.52061	1	-1.71577	1	1	1	1	1	-1.71942	-1.54316	-1.71506	1	1	1	1	1
1382939_at	Tpr	translocated promoter region	1	1	1	1	1	-2.02973	-2.4075	1	1	1	1	-1.93125	1	-2.07752	1	1	1	1	1
1374034_at	Cars	cysteinyl-tRNA synthetase	1	-2.94051	1	1	1	-3.18353	1	1	1	1	1	1	1	1	1	1	1	1	1
1391481_at	Cast		-2.08384	-1.75886	1	1	-1.67101	-1.80915	1	1	1	1.74774	2.52899	1	-2.67435	-2.08864	1.53005	-1.16377	-1.3546	-1.26924	-1.237
1389271_at	Vasn	vasorin	1	1	1	1	1	1	1	1	1	1	1	1	-2.05486	-2.70685	1	1	1	-2.35463	1
1387599_a_at	Nqo1	NAD(P)H dehydrogenase, quinone 1	1	-2.42626	-1.86819	-2.69275	-2.93463	1	1.63158	1	1	1	-2.34762	-1.8119	-2.02362	-1.79259	1	1	-1.83609	-2.53924	-1.40689
1369382_at	Mertk	c-mer proto-oncogene tyrosine kinase	1	1	1	1	1	-2.17415	1	1	1	1	1	1	1	-2.10617	1	1	1	1	1
1381993_at	Clic2	chloride intracellular channel 2	-1.33596	1	-1.37833	-2.25857	1	-1.68749	-1.80841	-1.63756	1	1.38088	1	1	1	1	1	-2.3512	1	1	-1.70899
1381431_at	Col18a1		-2.75505	1	1	1	1	-3.14326	1	1	1	1	1	1	1	1	1	1	1	1	1
1381335_at	1381335_at		1	1	1	1	1	-2.32113	1	-1.94196	1	1	1.88674	-2.23929	-2.4082	-2.09119	1	1	1	1	1
1382137_at	Abhd3	abhydrolase domain containing 3	1	1	1	1	1	1	1	1	1	2.67618	1	1	1	1	1	1	1	1	1
1390389_at	Mertk		1	1	1	-2.21845	1	1	-2.69975	-2.60052	-2.0418	1	1	1	-1.80127	-2.17444	1	-3.37842	1	1	1
1369059_at	Trpm7	transient receptor potential cation channel, subfamily M, member 7	1	1	1	-3.04318	1	-2.95824	1	1	1	1	1	1	1	1	1	1	1	1	1
1375751_at	1375751_at		1	1	1	1	-12.633	1	1	-12.2913	1	1	1	1	-15.8169	1	1	1	1	1	1
1375758_at	LOC690777		1	1	1	1	1	1	1	-6.20706	1	1	1	1	1	1	1	1	1	1	1
1389922_at	Hadh		1	1	1	1	1	1	1	1	1	1	1	1	1	1	1	-2.44217	1	1	1
1372672_at	Qprt	quinolinate phosphoribosyltransferase	-1.31548	1	-1.3323	1.2058	-1.31616	1	-1.90594	-1.38266	-1.92738	-2.342	-2.09503	-1.58677	-2.16933	-1.61885	-1.69971	-1.64792	-1.53437	-1.53935	-1.42482
1368863_at	Nme3	non-metastatic cells 3, protein expressed in	-1.27837	1	-1.28451	1	1	1	-1.67062	-1.57402	-1.641	-1.91064	-1.75575	-1.54944	-2.26745	-1.71479	-1.69586	-1.49536	-1.60555	-1.33923	-1.56853
1370897_at	Bckdha	branched chain ketoacid dehydrogenase E1, alpha polypeptide	-1.22049	1	1	1	1	1	-1.7746	-1.35997	-1.33358	-1.98178	-1.8415	-1.3605	-1.55171	-1.52533	1	-1.23317	-1.23931	-1.42538	-1.43718
1368916_at	Asl	argininosuccinate lyase	-1.42983	-1.28388	1	1	1	1	-1.93707	-1.46556	-1.98056	-1.72006	-1.96068	-1.52791	-1.96555	-1.55876	-2.02268	1	1	-1.57041	-1.52216
1372801_at	Commd10	COMM domain containing 10	1	1	1	1	1	1	-1.4977	-1.55203	-1.50817	-1.89733	-3.33284	-2.10679	-1.53747	1	-1.52277	-1.5507	-1.72176	-1.96686	-1.63423
1389031_at	RGD1566215	similar to Coatomer gamma-2 subunit (Gamma-2 coat protein) (Gamma-2 COP)	1	1	-1.51979	1	1	1	1	-1.62123	-1.58086	-1.64152	-4.16455	-2.04983	-1.61676	1	1	1	1	-1.57362	1
1371916_at	Sepx1	selenoprotein X, 1	-1.18432	1	-1.17441	1	1	1	-1.46279	-1.37347	-1.52972	-1.81608	-2.47848	-1.72528	-1.54195	-1.43633	-1.53733	-1.69558	-1.52582	-1.90494	-1.39124
1398049_at	Nit1	nitrilase 1	1	1	1	1	1	1	1	1	1	-1.93904	-3.29729	-1.90308	-1.7487	1	1	1	-2.05567	-2.1341	1
1377831_at	Maoa		1	1	1	1	-1.35328	1	-1.53984	-1.59176	-1.68511	-1.55867	-2.95684	-1.67871	-1.85966	-1.36476	1	-1.32685	-1.33244	-1.27326	-1.65799
1387920_at	Man2c1	mannosidase, alpha, class 2C, member 1	1	1	1	1	1	1	-1.57259	1	-1.51409	-1.8747	1	-1.74573	1	-1.49626	-1.7005	-1.49394	-1.54415	1	-1.69102
1382006_at	Snapap	SNAP-associated protein	1	1	1	1	1	1	1	1	1	-1.97915	1	-2.08352	1	1	-1.60021	-1.5717	-1.97997	-1.95223	-1.63635
1383423_at	1383423_at		1	1	1	1	1	1	1	1	1	-1.91067	-4.69273	-1.67717	1	1	-1.8154	-1.88222	-1.8626	1	-1.77682
1399130_at	Pigy	phosphatidylinositol glycan anchor biosynthesis, class Y	1	1	1	1	1	1	-1.28264	-1.31108	-1.38693	-1.60611	-1.89032	-1.6184	-1.27378	-1.33789	-1.43325	-1.46116	-1.31726	-1.46045	-1.57424
1376595_at	Pex1	peroxisome biogenesis factor 1	1	1	1	1	1	1	-1.54163	1	-1.35093	-1.61038	-1.72514	-1.83528	-1.58371	1	-1.3607	-1.84514	-1.70081	-1.43637	-1.92631
1397363_at	Pvrl3	Poliovirus receptor-related 3	1	-1.56945	-1.30832	1	1	1	-1.40378	-1.50268	-1.46028	-1.61763	1	-1.76728	-1.82962	-1.39536	-1.45197	-1.89355	-1.59975	1	-2.00591
1371639_at	Vps29	vacuolar protein sorting 29 (S. pombe)	1	1	1	1	1	1	1	1	1	1	-2.23082	1	1	1	-1.29955	-1.36683	-1.39437	-1.49534	-1.57533
1382048_at	Atp6v1a	ATPase, H+ transporting, lysosomal V1 subunit A	1	1	1	1	1	1	1	-1.40899	1	-2.01313	-3.59443	-1.56688	-1.97543	-1.61054	-1.35407	-1.24029	-1.3205	-1.31031	-1.45047
1372847_at	Acn9	ACN9 homolog (S. cerevisiae)	1	1	1	1	1	1	1	-1.81965	1	-1.78446	1	1	1	1	1	-1.54114	-1.47312	1	-1.65103
1375072_at	1375072_at		1	1	1	1	1	1	1	1	1	1	1	-1.60279	1	-1.75268	1	1	1	1	1
1374006_at	Kat3	kynurenine aminotransferase III	1	1	1	1	1	1	-1.63847	-1.57206	-1.6079	-2.09629	-1.86139	-1.63216	-2.13992	-1.45961	-1.27304	-1.33542	-1.63721	-1.20788	-1.5336
1372004_at	Hebp1	heme binding protein 1	1	1	1	1	1	1	-1.44803	-1.28574	-1.33072	-2.4824	-2.28537	-1.84304	-2.35909	-1.56799	-1.37686	-1.57057	-1.47029	-1.3442	-1.3387
1371035_at	Gtf3a	general transcription factor III A	1	1	1	1	1	1	1	1	1	1	1	-2.3762	1	1	1	-2.17123	1	1	1
1383094_at	Calm1		1	1	1	1	1	1.26533	-1.35507	-1.41073	-1.36973	-1.56306	-2.32156	-2.29019	-1.32375	-1.36371	-1.973	-1.53396	-1.56237	-1.39384	-1.53065
1382434_at	Entpd5	ectonucleoside triphosphate diphosphohydrolase 5	1	1	1	1	1	1	1	1	1	-2.10264	-1.99101	-2.55831	-2.22527	-1.36903	-1.74102	-1.49985	1	1	-1.98117
1370232_at	Ivd	isovaleryl coenzyme A dehydrogenase	1	1	-1.35353	-1.3632	1.45136	-1.35598	-1.8678	-1.43677	-2.01473	-1.62131	-2.8756	-1.60877	1	-1.84431	1	-1.47177	-1.94948	1	1
1369215_a_at	Cpd	carboxypeptidase D	1	1	1	1	1	-1.45067	-1.98797	-1.60026	-1.8139	-1.50087	-3.02983	-2.29963	1	-1.59394	1	-1.7747	1	1	-2.43783
1388300_at	Mgst3	microsomal glutathione S-transferase 3	-1.41079	1	1	1	1	1	-2.093	-1.88629	-2.88967	1	-2.83459	-1.51834	1	-1.62025	1	-1.94573	-2.05391	1	-2.28418
1368266_at	Arg1	arginase 1, liver	-1.15843	1	-1.35467	1.22367	1.22185	1	-1.77199	-1.70611	-1.62582	-1.84739	-2.07515	-1.77585	1	1	-1.28864	-1.2123	-1.61449	-1.34707	-2.12458
1383538_at	RGD1565257		1	-1.28367	1	1	1	1	-1.70511	-1.52471	-1.53374	-1.77786	-1.93217	-1.7187	1	-1.35043	-1.31666	-1.45728	-1.28085	-1.34145	-1.59032
1380975_at	RGD1564074_predicted		1	1	1	1	1	1	-1.56677	-1.45561	-1.40259	-1.55238	1	-1.53464	1	1	-1.35248	-1.30832	1	-1.28375	-1.66024
1373892_at	Fbxl17_predicted		1	1	1	1	1	1	-1.59934	-1.67402	1	-1.68363	-2.10568	1	1	1	-1.4125	-1.51809	-1.34088	-1.31845	-1.57493
1397698_at	Fbxl17_predicted		1	1	1	1	1	1	-1.82109	-1.91104	-1.65526	-1.77922	-2.04802	-1.95953	1	-1.73891	1	-1.53126	1	1	-1.66437
1382602_at	RGD1565257		1	-1.45947	1	-1.2309	1	1	-1.80109	-1.8376	-1.67547	-1.89773	-1.90857	-1.88244	1	-1.734	-1.47414	-1.48362	-1.33468	-1.47764	-1.58148
1390348_at	Folr2	folate receptor 2 (fetal)	1	1	1	1	1	1	-1.90309	-1.75142	1	-1.99965	1	-1.90902	1	1	1	1	1	1	1
1383332_at	Hipk2_predicted		1	1	1	1	1	1	-1.89057	1	1	1	1	-1.95026	1	1	1	1	1	1	1
1384164_at	1384164_at		1	1	1	1	1	1	-1.94695	-1.78843	-1.71787	-1.58275	1	-2.06379	-1.87157	1	1	-1.57491	1	1	-1.78204
1383462_at	Znf294	zinc finger protein 294	1	1	1	1	1	1	1	1	1	1	1	1	1	1	1	1	1	1	-1.74726
1386520_at	Irx3	Iroquois related homeobox 3 (Drosophila)	1	1	1	1	1	1	-3.79637	1	1	1	1	1	1	1	1	1	1	1	1
1372109_at	Pnkd		1	1	1	1	1	1	1	1	1	-3.20018	1	1	1	-2.22574	1	-1.803	1	1	1
1368079_at	Pdk1	pyruvate dehydrogenase kinase, isoenzyme 1	1	1	1	1	1	1	-2.09246	-1.7327	-1.72125	-1.8722	-1.80683	-1.47173	1	-1.49442	-1.38805	-1.76706	-1.40396	-1.48144	-1.43469
1376592_at	Mcee	methylmalonyl CoA epimerase	1	1	-1.33405	1	1	1	-1.87964	-1.88878	-1.94034	-1.68585	-1.64523	-1.60541	1	-1.4794	-1.37429	-1.53934	-1.7559	-1.62049	-1.59698
1387034_at	Pah	phenylalanine hydroxylase	1	1	-1.45072	1	1	1	-2.1197	-1.97633	-1.87496	-1.43001	-1.69176	-1.74997	-1.63752	-1.32263	-1.3068	-1.46486	-1.6719	-1.6146	-1.77
1387023_at	Gstm7	glutathione S-transferase, mu type 3	1	1	1	1	1	1	-2.32585	-2.24287	-1.97231	1	-1.64515	1	-1.43164	-1.84832	1	-1.55548	-1.74148	-1.34787	-1.66859
1385508_x_at	RGD1310656_predicted		1	1	1	1	1	1	-4.00204	1	1	1	1	1	-2.36299	1	1	1	1	-5.6016	1
1387511_at	Cyp2a1	cytochrome P450 IIA1 (hepatic steroid hydroxylase IIA1) gene	1	-1.2343	-1.26767	1	1	1	-1.57027	-1.24573	-1.48088	1	-1.4476	-1.21778	-2.21583	-1.37576	-1.74622	-1.34701	1	-1.28609	-1.57065
1387372_at	Slc6a13	solute carrier family 6 (neurotransmitter transporter, GABA), member 13	1	1	1	1	1	1.24887	-1.39023	-1.54698	-1.6075	1	1	1	-2.23211	1	-1.40734	-1.51154	-1.37083	-1.73982	-1.31047
1367737_at	Fuca1	fucosidase, alpha-L- 1, tissue	1	1	1	1	-1.17005	1	-1.49387	-1.31044	-1.49418	1	-1.57617	-1.15053	-1.80689	-1.47575	-1.47803	-1.42232	-1.49087	-1.49356	-1.40315
1379459_at	Pnpla8	patatin-like phospholipase domain containing 8	1	1	1	1	1	1	1	-1.85512	1	-1.41617	1	-1.39614	-1.72307	1	-1.63293	-1.5611	1	-1.70732	-1.54103
1387885_at	Fcgrt	Fc receptor, IgG, alpha chain transporter	1	1	1	1	1	1	-1.50818	-1.29374	1	1	1	1	-2.13249	-1.44431	-1.83759	-1.49113	-1.3641	-1.60041	-1.36174
1385842_at	Il1f8	interleukin 1 family, member 8	1	1	1	1	1	1	1	1	1	1	1	1	-2.15017	1	1	1	1	1	1
1372706_at	Hexb	hexosaminidase B	1	1	1	1	1	-1.42071	-1.87869	-1.61775	-1.40645	1	-1.60927	1	-1.67022	-1.44156	-1.8293	-1.36772	-1.60015	-1.59672	-1.67438
1372124_at	Eif4b	eukaryotic translation initiation factor 4B	1	1	1	1	1	-1.49594	-1.66404	-1.61774	-1.59549	1	1	1	1	-1.54306	-1.80557	-1.61256	-1.37974	-1.45259	-1.77069
1367929_at	Cd59	CD59b moleucle, complement regulatory protein	1	1	1	1	-1.18713	-1.22709	-1.82866	-2.2499	-1.70237	-1.28629	1	-1.21273	-1.25124	-1.50425	-1.42745	-1.53096	-1.42625	-1.70032	-1.38949
1382223_at	Zmym4	zinc finger, MYM-type 4	1	1	1	1	1	1	-1.73886	1	1	1	1	1	1	1	1	1	1	1	1
1377793_at	RGD1310651_predicted		1	1	1	1	1	1	1	1	1	1	1	1	1	1	1	-1.77502	1	1	1
1389123_at	Ccl6	chemokine (C-C motif) ligand 6	1	1	1	-1.93372	1	1	-1.79239	1	1	1	-1.60472	1	-1.75737	1	-1.86164	-1.57046	-1.34281	-1.41801	-1.31901
1393997_at	RGD1564257	similar to hypothetical protein FLJ32825	1	1	1	1	1	1	1	1	1	1	1	1	1	1	-1.94425	1	1	1	1
1370199_at	Nucb1	nucleobindin 1	1	1	1	1	1	1	-1.45176	1	1	1	1	1	-1.56283	-1.57227	-1.58344	-1.47734	1	-1.43719	-1.47
1383071_at	Mtpn	myotrophin	1	-1.37523	1	1	1	1	-1.51965	-1.24707	-1.34049	1	1	1	-1.39417	-1.38752	-1.47686	-1.50569	-1.42906	-1.38951	-1.45976
[truncated: 9,427 more rows]
